# Supplementary material for: Genome-wide analysis of mRNA abundance in two life-cycle stages of Trypanosoma brucei and identification of splicing and polyadenylation sites
Source: PubMed Central journal article supplement — Nucleic Acids Res. 2010 Apr 12;38(15):4946–57. doi: 10.1093/nar/gkq237 (PMC2926603; doi:10.1093/nar/gkq237), 2010-04-12
Supplement: gkq237_1.pdf [file gkq237_1.pdf]

## Supplementary Figure Legends

### Figure S1

Comparison of noise in technical replicates to Poisson distribution. Histogram of deviation from the mean, scaled by the expected standard deviation for four PF technical replicates. The expected mean was approximated as the weighted scaled count of the four replicates.

### Figure S2

Comparison of biological replicates. Histogram of the deviation of tag counts between pairs of biological replicates, averaged over technical replicates where possible, scaled by the expected standard deviation based on only technical noise (i.e. counting statistics). Magenta line: expected histogram based on only technical noise. Red line: Gaussian fit of histogram. A: Comparison of two wild-type BF replicates; B: comparison of the first wild-type BF replicate to the one SM BF run; C: comparison of the second “no marker” BF replicate to “Single marker” BF, D: comparison of two PF biological replicates. Specifically, we used the test quantity

$T_{ik} = (\tilde{X}_i - \tilde{X}_k) / \sqrt{\sigma_i^2 + \sigma_k^2}$ , with  $\sigma_i^2 = \left( \sum_j X_{ij} \right) / \sum_j a_j^{-2}$ . The peaks at  $T_{ik} = 0$  are caused by the discrete nature of the actual counts.

### Figure S3

Comparison of RNA-seq with results from Koumandou et al., 2008. N-fold regulation for a selection of genes as determined by Koumandou et al., 2008 using microarray (upper panel) and real time PCR (lower panel) was plotted against RNA-seq data.

### Figure S4

Alignment of sequenced tags that identify the location of introns in Tb927.3.3160 and Tb927.8.1510. Tag sequences in red are as sequenced: tag sequences in green are the reverse complement of the actual sequences.

**Figure S1**

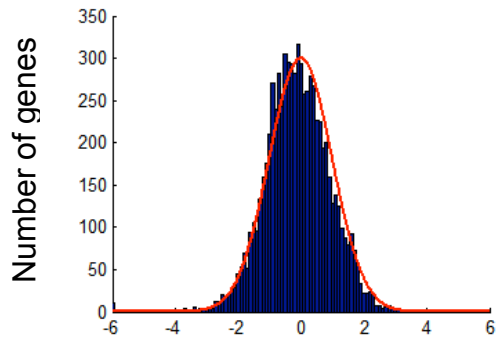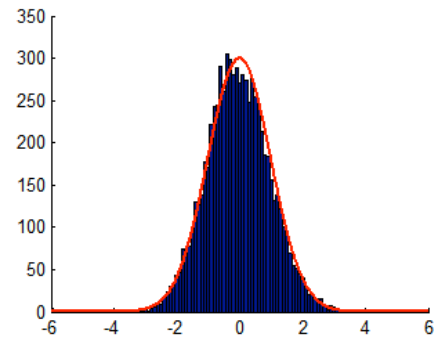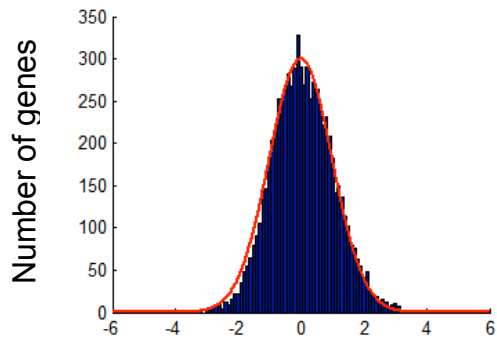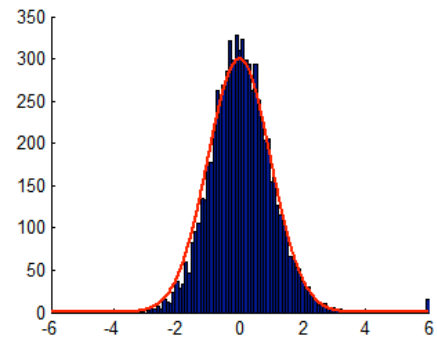

Normalized deviation from mean

Normalized deviation from mean

**Figure S2**

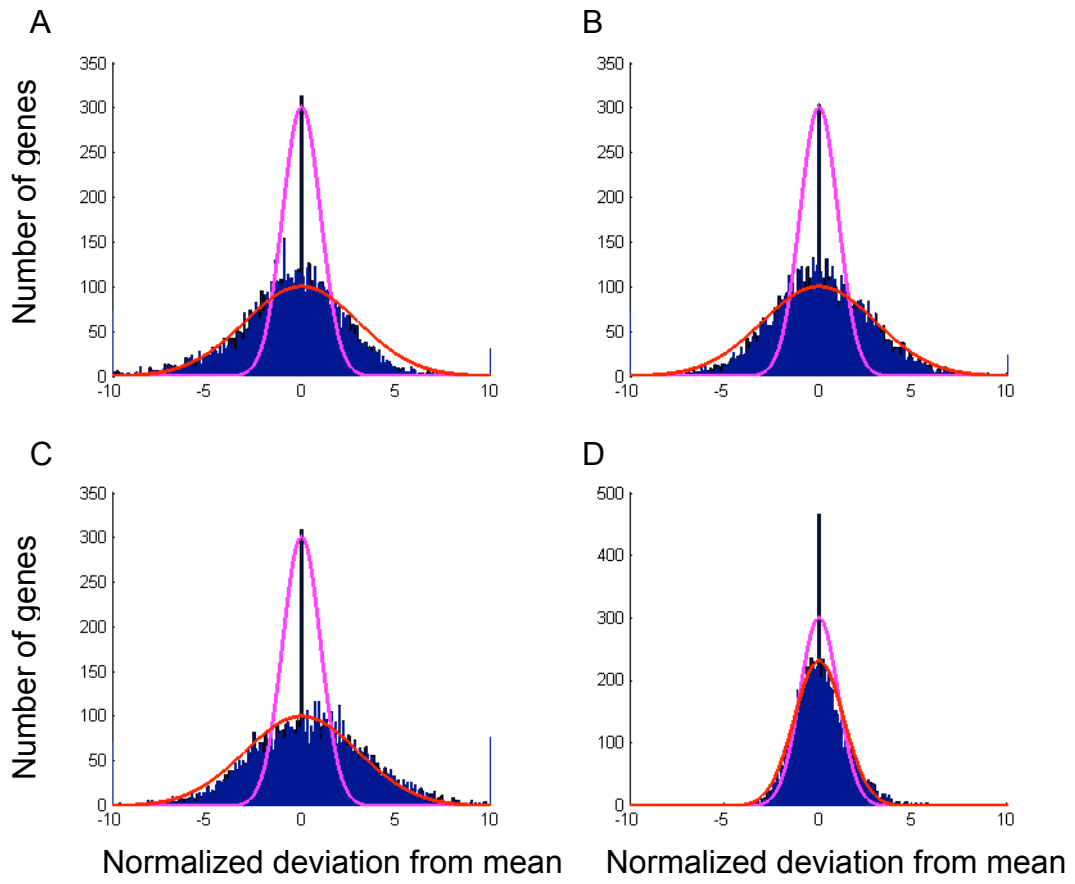

**FIGURE S3**

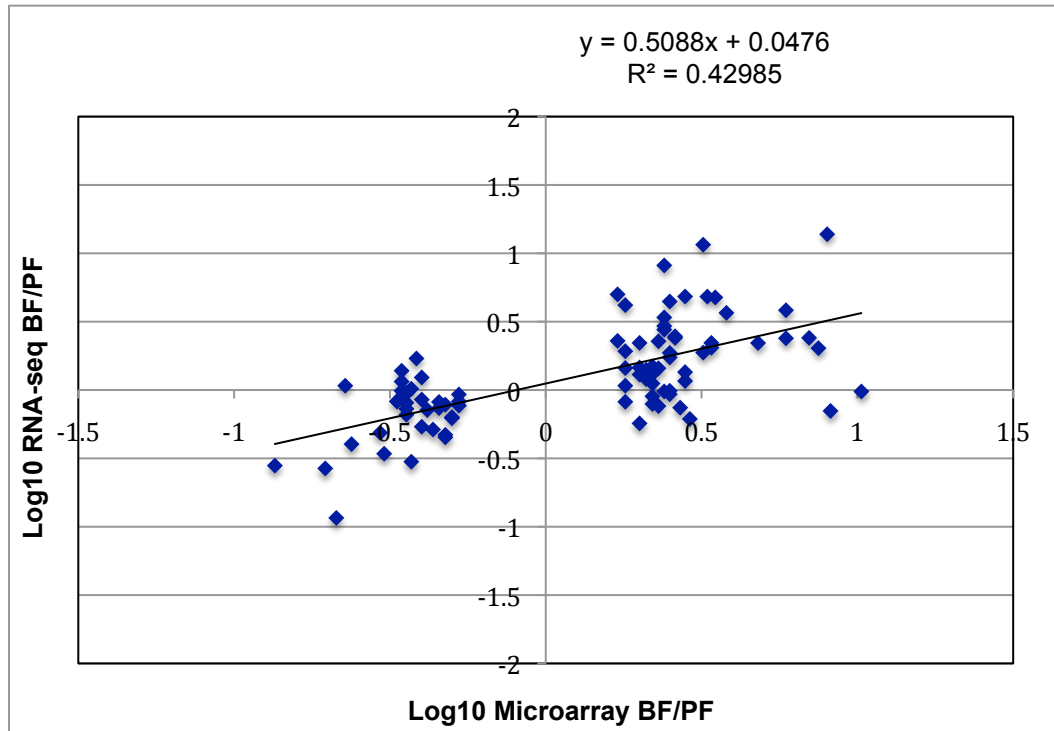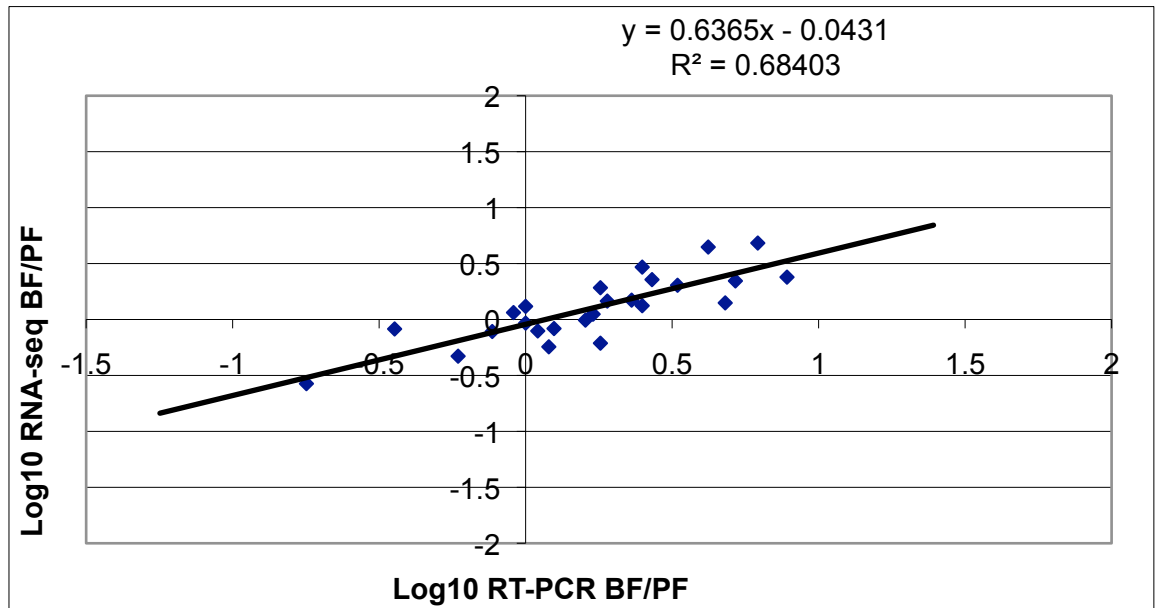

# FIGURE S4

Tb927.3.3160: EXON sequences are black, INTRON blue, TAG sequences red or green (reverse complement of actual tag sequences)

```
ATGGAGTGGATGTATGGCCCAACGAAACCACTAGAGGTTCCCGTCCACAAGACCATGACTACGACGAGTCTGAGATGCTTTACGGCGTGTGGCCGAAT
GCCCTTCCATTAGTCCCAATCCGGTTTTAACGCTAGTGGAGTCGATGGCGCTTCGCATTTGTGCAGCGGCACTCCCAAACACTCAGGAACAATGGGCACG
TGCC TACCCATTTGGTTCATGCGGTCTTTCCGCTFCAGTTGCAGAGAGTGATCTCGATGTgtatggtgagttccttccttaatccctcctttctactccc
      GTTGCAGAGAGTGATCTCGATGT-----
      TTTCCGCTGCAGTTGCAGAGAGTGATCTCGATGT-----
      CTTTCCGCTGCAGTTGCAGAGAGTGATCTCGATGT-----
TCATGCGGTCTTTCCGCTGCAGTTGCAGAGAGTGATCTCGATGT-----
      TTGCAGAGAGTGATCTCGATGT-----
      CGGTCTTTCCGCTGCAGTTGCAGAGAGTGATCTCGATGT-----
CATGCGGTCTTTCCGCTGCAGTTGCAGAGAGTGATCTCGATGT-----
      AGTTGCAGAGAGTGATCTCGATGT-----
      TTGCAGAGAGTGATCTCGATGT-----
      CGGTCTTTCCGCTGCAGTTGCAGAGAGTGATCTCGATGT-----
      CAGTTGCAGAGAGTGATCTCGATGT-----
      CGCTGCAGTTGCAGAGAGTGATCTCGATGT-----
      CATTGGTTCATGCGGTCTTTCCGCTGCAGTTGCAGAGAGTGATCTCGATGT-----
```

```
ttcttctttctcctctctttgtatgatgcactcctctcttctctctctttctttactattcttttcccttttgggtgtctgggctcttttcaattt
atgttgatcatgtgaacccttaaaggaacgtgcttctgctttacgtgtaactctttccctgctcttctcccgctcctctcttttcttccctcctcaca
tcgttccctgttccctgctttcacgtgcccgcactgccttctgcagctctggacgcttcaactcttgcctggtgtgogaacctctggtggtgatctgctg
ctgtttcgtttcactgtctatacatttggttatattccaacattgaccattgcttcttctctgtaataatgatgtgattatctaaatagcatatacat
gtataatcatatgtacacgtatacatttgggtatgtatatttgggtgatgtgagctgttctgctgctgctgacactcgtgaccgcacatggtac
tgacggcaaacacggatgctgattttccattttttttttgggtcaaaccccgcaaccatatttcaaccaacaacaatcacaaccggaattacgttga
atgtgtgaagCGCGCTGATTTGTCCATCTGTTTTAACGACTGATATCTTTTTTCGATGAGTTTCCGAGGTGTTTATATAACTCTGTGCGGTCCCGTGTCTGT
-----CGCGCTGATTTGTCCATCTGTTTTAACGACTGATATCTTTTTTCGATGAGTTTCC
-----CGCGCTGATTTGTCCATCTGTTTTAACGACTGATATCTTTTT
-----CGCGCTGATTTGTCCATCTGTTTTAACGACTGATATCTTTTT
-----CGCGCTGATTTGTCCATCTGTTTTAACGACTG
-----CGCGCTGATTTGTCCATCTGTTTTAACGACTGATATCTTTTTTCGATGAGTTTCC
-----CGCGCTGATTTGTCCATCTGTTTTAACGACTGAGATC
-----CGCGCTGATTTGTCCATCTGTTTTAACGACTGA
-----CGCGCTGATTTGTACATCTGTTTTAACGACTGATATCTTTTTTCGATGAGTTT
-----CGCGCTGATTTGTCCATCTGTTTTAACGACTGATATCTTTTTTCGATGAGTTTCC
-----CGCGCTGATTTGTCCATCTGTTTTAACGACTGATAT
-----CGCGCTGATTTGTCCATCTGTTTTAACGACTGATATCTTTTTTCGATGAGTT
-----CGCGCTGATTTGTCCATCTGTTTTAACGACTGATATCTTTTTTCGAT
-----CGCGCTGATTTGTCCATCTGTTTT
```

```
AGTCGCTGCCAGAGTTCCTGTTGTTAAATTTGAGTACAGAGGCACAGCTGTCGATGTTGTTGTTTCTGTTGGACTGCCACAGCCGCTACGGAGGAG
CAGATGCTGGATGATTCGTTTCTACTGAAGGTGGCTCGAGAAACCCGACCAGTGCGAACGGAATCCGTTTACGTTTGGAGATTAAGCGGCGACTTCCGG
TGCCGTACGATGCTTCACTGCCGTTTGAAGACAGTAAAGCTATGGGCGATGCGTCCGATGTTTACGGCAATGTCTACACGTATCCGAACGGCGCGGT
GCTTGCATCATGGTGGCTAGGGTTTGTGAGGTGCTTCCATCTTCTATCCCAGTACTTCTTCCGATTTTTCTTTCTTTTCTACACGCAATGGATGAGC
CGCCATGATCGTATTTACCCGTGATTTGACTGCGACTCTGGAGGGTCGCGTCCGATTTCCCGGGCTGCCAGACTCATGGAAGCCGTCGAAAGATAAAA
TTTGTCTGCGATTTGTTTCCGCTGATCAGTCCGGCCTATCCATATGTGAACGATGCAAGTAGCGTTGGGCGATGTGGGCTGGAGGCGCTTACAGCGAGAT
CACACGGGTGCAATGCATTTGACGGAGGCGGGACTCTCCGTTGGAAGAGATGTGGGAACCGTATAGAATAGAGGAAGAGTATTAACCTTTCTTGT
GTGGGTGTAAGTTGTGGGGCCACAGTATGGCGGAGACTGAGCAGGCGCTTCTGTGTGGAGTTCTATGTGGCCAGCAGGTTACGAATCCTCATATACT
CCATAGAGCGTACGACAGGCCGCTCCCTGTCCGCTAAGATAAAGGCCAAAAGGATAATCACGTGGGGGTTCTTTCATGTTTTTTGTCTGTCAATTT
CCTCATAGGTGTTAAGGCAAAGGAGGGGGTCCACCCACAGCCGCTCTCTGTTTACTGAGGCGTGTGGCGAGTTTACCACGCTGTGAAGGAGGATGT
AACAATGACTCCATTCGTTGTCATTTTCAGCGAATGATCGTGAATGCATTGGCCCCGTGTCAAATTTTAGAGGTGCATCAGGTGCTGCACCTGTTAC
AAGACCTGAAGTAA
```



-----GGCGTACCGGTCGTGCCGGGCAGGGTGGTGATGCTTCC  
-----GGCGTACCGGTCGTGCCGGGCAGCGTGGTGAT  
-----GGCGTACCGGTCGTGCCGGGCAGAGTGGTGAT  
-----GGCGTACCGGTCGTGCCGGGCAGCG  
-----GGCGTACCGGTCGTGCCGGGCAGCGTGGGATG  
-----GGCGTACCGGTCGTGCCGGGCAGCGTGGTGATG  
-----GGCGTACCGGTCGTGCCGGGCAGCGTGGTGATGCTTAC  
-----GGCGTACCGGTCGTGCCGGGCAGC  
-----GGCGTACCGGTCGTGCCGGGCAG  
-----GGCGTACCGGTCGTGCCGGGCAG  
-----GGCGTACCGGTCGTGCCGGGCAGCGTGGTGATG  
-----GGCGTACCGGTCGTGCCGGGCAGCGTGGTGATGCTTACACATTTGTT  
-----GGCGTACCGGTCGTGCCGGGCAGCGTGGTGATGCTTACACATTT  
-----GGCGTACCGGTCGTGCCGGGCAGCGTGGTGATGCTTACACATTT

GTGCCGATCCGTCCAAGACTGTTTCGTGACTTGATCGACATTCTTCGCCCGCCAATCAGGAGATTCCACCAGGGCTTCACTCGCTTGCTGGCCGCGGTGG  
CGGTGGCAGTGGCGGTGGCGGCTTCCGTGGGGCCGTCGCGGAGGGTACGGTGGGGCGGTGGCGGTTACGGCTACGGCCGCTCTGGTGCGCAGTACGGC  
TCTGGGCCACATACGGCAGGGATTACCGTGGCGCTCCATCCACCATCAATCGGGTATTCTGTGGTGGCAATACATCTGATGCCTATTGGAGAGGGG  
GAGCGCCACCGCTGGTCAACAGCCTTACTATCCGGTGTGCGGAGGTAATAAACGGACCCGTGAGGTGTCCGGCGGCTTTCACCTCAGATCCTCAGAACTC  
GTACCGTCAGCAACCGACGGGTGGTTCTTATTAG

Genes reported to be upregulated in PF (Brems, Guilbride, Gundlesdodjir-Planck, Busold, Luu, Schanne, Hoheisel & Clayton (2005) The transcriptomes of *Trypanosoma brucei* Lister 427 and TREU927 bloodstream and procyclic trypomastigotes. Mol Biochem Parasitol 139, 163-172.) are largely consistent with our RNA-seq data

Highlighted fields indicate genes for which our RNA-seq data are inconsistent the data reported by Brems et al.

| Group          | Old Gene ID       | New Gene ID                                            | Description                                                                       | RNA-seq BF/PF Ratio       | RNA-seq p Value | Comments |
|----------------|-------------------|--------------------------------------------------------|-----------------------------------------------------------------------------------|---------------------------|-----------------|----------|
| Membrane       | Tb10.6k15.3510    |                                                        | CRAM                                                                              | not analyzed (repetitive) |                 |          |
|                | Tb07.25D22.110    | Tb927.7.6850                                           | trans-sialidase                                                                   | 0.12                      | 0.00            |          |
|                | Tb08.29O9.350     | Tb927.8.1610                                           | major surface protease gp6                                                        | 0.39                      | 0.00            |          |
|                | Tb05.29K2.440     | Tb927.5.440                                            | trans-sialidase                                                                   | 0.1                       | 0.00            |          |
|                | Tb05.3C6.130      | Tb927.5.2170                                           | META1-like                                                                        | not analyzed (repetitive) |                 |          |
|                | Tb09.211.4070     |                                                        | GPI anchored protein                                                              | 0.39                      | 0.01            |          |
|                | Tb927.1.2310      |                                                        | Membrane protein                                                                  | 0.79                      | 0.16            |          |
|                | Tb927.2.5290      |                                                        | Mucin-like, 8 copies                                                              | not analyzed (repetitive) |                 |          |
|                | Tb05.29K2.440     | Tb927.5.440                                            | Trans-sialidase-like                                                              | 0.1                       | 0.00            |          |
|                | Tb11.0310         |                                                        | sequence orphan                                                                   |                           |                 |          |
| Transporter    | Tb03.6N20.700     | Tb927.3.590                                            | Adenosine transporter                                                             | 0.6                       | 0.08            |          |
|                | Tb04.3I12.190     | Tb927.4.4730                                           | Amino acid transporter                                                            | not analyzed (repetitive) |                 |          |
|                | Tb07.10C21.10/20  | Tb927.7.5940                                           | hypothetical protein                                                              | not analyzed (repetitive) |                 |          |
|                | Tb07.2F2.110-150  | Tb927.7.5970                                           | hypothetical protein                                                              | not analyzed (repetitive) |                 |          |
|                | Tb08.4A8.350      | Tb927.8.4700                                           | Amino acid transporter                                                            | 0.56                      | 0.00            |          |
|                | Tb10.6k15.1350    |                                                        | Pteridine transporter                                                             | 0.27                      | 0.00            |          |
|                | Tb09.160.5480     |                                                        | Nucleoside transporter                                                            | 0.12                      | 0.00            |          |
|                |                   |                                                        |                                                                                   |                           |                 |          |
| Glycosome      | Tb11.02.4150      |                                                        | pyruvate phosphate dikinase                                                       | 0.12                      | 0.00            |          |
|                | Tb10.61.0980      |                                                        | glycosomal malate dehydrogenase                                                   | 0.14                      | 0.00            |          |
|                | Tb927.2.4210      |                                                        | glycosomal phosphoenolpyruvate carboxykinase, glycosomal protein P60              | 0.28                      | 0.00            |          |
|                | Tb03.26J7.860     | Tb927.3.4500                                           | fumarate hydratase, putative                                                      | 0.24                      | 0.00            |          |
| Mitochondrion  | Tb07.30D13.350/6C | Tb927.7.7420                                           | ATP synthase alpha                                                                | 0.32                      | 0.00            |          |
|                | Tb03.1J15.500     | Tb927.3.1380                                           | ATP synthase beta                                                                 | 0.18                      | 0.00            |          |
|                | Tb09.160.4310     |                                                        | Glutamate dehydrogenase                                                           | 0.22                      | 0.00            |          |
|                | Tb09.160.1820     |                                                        | COX V cytochrome c oxidase subunit V                                              | 0.44                      | 0.10            |          |
|                | Tb03.1J15.440     | Tb927.3.1410                                           | COX VII cytochrome c oxidase subunit VII                                          | 0.41                      | 0.10            |          |
|                | Tb04.3I12.400     | Tb927.4.4620                                           | COX VIII cytochrome c oxidase subunit VIII                                        | 0.21                      | 0.00            |          |
|                | Tb11.01.4702      |                                                        | COX X cytochrome c oxidase subunit X                                              | not analyzed (repetitive) |                 |          |
|                | Tb08.26A17.490    | Tb927.8.2530                                           | Cytochrome c oxidase copper chaperon domain                                       | 1.32                      | 0.84            |          |
|                | Tb07.13M20.760    | Tb927.7.2700                                           | NADH-cytochrome b5 reductase                                                      | 0.38                      | 0.00            |          |
|                | Tb09.160.4380     |                                                        | Succinate dehydrogenase                                                           | 0.43                      | 0.02            |          |
|                | Tb09.211.4700     |                                                        | reiske iron-sulfur protein, mitochondrial precursor                               | 0.28                      | 0.00            |          |
|                | Tb09.244.2620     |                                                        | hypothetical protein, conserved                                                   | 0.7                       | 0.07            |          |
|                | Tb10.1650         | Tb10.61.2880                                           | Aconitase                                                                         | 0.24                      | 0.00            |          |
|                | Tb11.01.1740      |                                                        | 2-oxoglutarate dehydrogenase E1 component, putative                               | 0.4                       | 0.00            |          |
|                |                   |                                                        | 2-oxoglutarate dehydrogenase, E2 component, dihydroliipoamide                     |                           |                 |          |
|                | Tb11.01.3550      |                                                        | succinyltransferase, putative                                                     | 0.41                      | 0.00            |          |
|                |                   |                                                        | succinyl-coA:3-ketoacid-coenzyme A transferase, mitochondrial precursor, putative |                           |                 |          |
| Tb11.02.0290   |                   | precursor, putative                                    | 0.88                                                                              | 0.15                      |                 |          |
| Tb10.6k15.3250 |                   | succinyl-CoA ligase [GDP-forming] beta-chain, putative | 0.5                                                                               | 0.00                      |                 |          |



|                 |                 |              |                                                                                                      |                           |      |      |                     |
|-----------------|-----------------|--------------|------------------------------------------------------------------------------------------------------|---------------------------|------|------|---------------------|
|                 | Tb11.03.0870    |              | mitochondrial carrier protein, putative                                                              |                           | 0.7  | 0.10 |                     |
|                 | Tb05.28F8.230   | Tb927.5.1060 | mitochondrial processing peptidase, beta subunit,<br>putative,metallo-peptidase, Clan ME, Family M16 |                           | 0.20 | 0.00 |                     |
|                 | Tb927.1.1690    |              | RNA-editing complex protein,nuclease, putative,KREPB1                                                |                           | 0.81 | 0.15 |                     |
|                 | Tb07.27M11.900  | Tb927.7.1550 | RNA-editing complex protein,RNA-editing 3' terminal uridylyl<br>transferase 2,KRET2                  |                           | 0.65 | 0.05 |                     |
| Enzyme          | Tb11.03.0940    |              | elongation factor, putative                                                                          |                           | 0.73 | 0.04 |                     |
|                 | Tb11.02.2310    |              | Prostaglandin F synthase                                                                             |                           | 0.34 | 0.00 |                     |
|                 | Tb11.02.5410    |              | Ubiquitin activating enzyme                                                                          |                           | 0.95 | 0.44 |                     |
|                 | Tb927.1.2230    |              | Calpain-like fragment                                                                                | not analyzed (repetitive) |      |      |                     |
|                 | Tb07.26A24.1130 | Tb927.7.4390 | Threonine synthase                                                                                   |                           | 0.31 | 0.00 |                     |
|                 | Tb10.389.1480   |              | Metalloprotease                                                                                      |                           | 0.19 | 0.00 |                     |
|                 | Tb927.2.2500    |              | hypothetical protein, conserved                                                                      |                           | 0.71 | 0.13 |                     |
|                 | Tb927.2.2510    |              | hypothetical protein, conserved                                                                      |                           | 0.19 | 0.00 |                     |
|                 | Tb03.27F10.890  | Tb927.3.690  | Protein kinase                                                                                       |                           | 0.93 | 0.35 |                     |
| Cytoskeleton    | Tb04.1D20.740   | Tb927.4.3950 | CAP5.5                                                                                               | not analyzed (repetitive) |      |      |                     |
|                 | Tb08.10J17.170  | Tb927.8.4010 | FLA1 flagellar adhesion protein                                                                      | not analyzed (repetitive) |      |      |                     |
|                 | Tb07.22O10.840  | Tb927.7.2640 | Myosin-like                                                                                          | not analyzed (repetitive) |      |      |                     |
|                 | Tb10.406.0650   |              | Microtubule-associated                                                                               | not analyzed (repetitive) |      |      |                     |
|                 | Tb08.4A8.660    |              | Kinesin                                                                                              | not analyzed (repetitive) |      |      |                     |
|                 | Tb11.01.7880    |              | microtubule-associated protein,corset-associated protein 17                                          |                           | 0.34 | 0.00 |                     |
|                 | Tb04.5E12.340   | Tb927.4.1110 | hypothetical protein, conserved                                                                      |                           | 1.04 | 0.58 | Brems ("weak data") |
| Gene expression | Tb08.10J17.140  | Tb927.8.4040 | Endonuclease                                                                                         | not analyzed (repetitive) |      |      |                     |
|                 | Tb05.26K5.1010  | Tb927.5.2570 | Translation initiation factor                                                                        |                           | 0.58 | 0.01 |                     |
|                 | Tb10.70.4600    |              | Elongation factor                                                                                    |                           | 0.71 | 0.04 |                     |
|                 | Tb10.26.1080    |              | *HSP83                                                                                               |                           | 0.35 | 0.00 |                     |
|                 | Tb07.13M20.480  | Tb927.7.2970 | ATP-dependent DEAD/H RNA helicase, putative                                                          |                           | 1.23 | 0.93 | Brems ("weak data") |
|                 | Tb11.01.8290    |              | ATP-dependent DEAD/H RNA helicase, putative                                                          |                           | 1.22 | 0.80 | Brems ("weak data") |
|                 | Tb11.02.2930    |              | SNF2 DNA repair protein, putative,SNF2 family protein                                                |                           | 0.8  | 0.20 |                     |
| Other           | Tb07.27M11.780  | Tb927.7.1460 | Importin                                                                                             |                           | 0.87 | 0.20 |                     |
| Unknown         | Tb08.26N11.180  | Tb927.8.1790 | hypothetical protein, conserved                                                                      |                           | 0.61 | 0.04 |                     |
|                 | Tb03.1J15.550   | Tb927.3.1350 | hypothetical protein, conserved                                                                      |                           | 0.39 | 0.01 |                     |
|                 | Tb09.244.2660   |              | hypothetical protein, conserved                                                                      |                           | 0.57 | 0.01 |                     |
|                 | Tb07.21H15.100  | Tb927.7.7220 | hypothetical protein, conserved                                                                      |                           | 1.06 | 0.62 |                     |
|                 | Tb11.01.7880    |              | microtubule-associated protein,corset-associated protein 17                                          |                           | 0.34 | 0.00 |                     |
|                 | Tb07.22O10.800  | Tb927.7.2630 | hypothetical protein, conserved                                                                      |                           | 1.12 | 0.78 | Brems ("weak data") |
|                 | Tb927.1.2260    |              | calpain-like protein fragment, putative                                                              | not analyzed (repetitive) |      |      |                     |
|                 | Tb07.13M20.380  | Tb927.7.2980 | hypothetical protein, conserved                                                                      |                           | 0.38 | 0.00 |                     |
|                 | Tb05.3C6.130    | Tb927.5.2170 |                                                                                                      | not analyzed (repetitive) |      |      |                     |
|                 | Tb08.10J17.80   | Tb927.8.4050 | hypothetical protein, conserved                                                                      |                           | 0.24 | 0.00 |                     |

Genes reported to be upregulated in BF (Brems et al 2005) are largely consistent with our RNA-seq data

|          |              |  |                                                 |                           |  |  |
|----------|--------------|--|-------------------------------------------------|---------------------------|--|--|
| Membrane | Tb927.5.370  |  | 75 kDa invariant surface glycoprotein, putative | not analyzed (repetitive) |  |  |
|          | Tb927.2.3270 |  | 65 kDa invariant surface glycoprotein, putative | not analyzed (repetitive) |  |  |
|          | Tb11.0360    |  | could not identify gene                         |                           |  |  |

|                 |                    |              |                                                                   |                           |      |                     |
|-----------------|--------------------|--------------|-------------------------------------------------------------------|---------------------------|------|---------------------|
|                 | Tb11.33.0013       |              | could not identify gene                                           |                           |      |                     |
|                 | Tb927.2.6000       |              | glycosylphosphatidylinositol-specific phospholipase C, VSG lipase | 13                        | 1.00 |                     |
|                 | Tb11.01.3790       |              | Membrane protein                                                  | 1.2                       | 0.70 |                     |
| Transporter     | Tb11.01.0725-30    |              | Cation transporter                                                | not analyzed (repetitive) |      |                     |
|                 | Tb927.2.6150       |              | P1-type nucleoside transporter                                    | not analyzed (repetitive) |      |                     |
|                 | Tb03.26J7.120-160  | Tb927.3.4070 | 13 trans-membrane domains                                         | not analyzed (repetitive) |      |                     |
|                 | Tb04.3M17.20-69    |              | could not identify gene                                           |                           |      |                     |
|                 | Tb927.2.6200       |              | TbNT3 adenosine transporter 2                                     | not analyzed (repetitive) |      |                     |
| Glycosome       | Tb10.70.1370       |              | Aldolase                                                          | 5.03                      | 1.00 |                     |
|                 | Tb10.70.5800       |              | Hexokinase                                                        | 3.67                      | 1.00 |                     |
|                 | Tb03.3K10.320      | Tb927.3.3270 | ATP-dependent phosphofructokinase                                 | 5.13                      | 1.00 |                     |
|                 | Tb09.211.3540-3580 |              | Glycerol kinase                                                   | 0.99                      | 0.34 |                     |
|                 | Tb10.1550          |              | could not identify gene                                           |                           |      |                     |
|                 | Tb927.1.3830       |              | PGI glucose-6-phosphate isomerase                                 | 3                         | 1.00 |                     |
| Mitochondrion   | Tb10.6k15.3640     |              | Alternative oxidase                                               | 4.97                      | 1.00 |                     |
| Cytoskeleton    | Tb10.61.1750       |              | Kinesin                                                           | 5.26                      | 1.00 |                     |
|                 | Tb11.01.3805       |              | CAP15                                                             | not analyzed (repetitive) |      |                     |
| Gene expression | Tb927.2.3880       |              | HNRNPH                                                            | 2.57                      | 0.99 |                     |
|                 | Tb05.45E22.550     | Tb927.5.4250 | Histone H4                                                        | 0.87                      | 0.02 | Brems ("weak data") |
|                 | Tb07.8P12.500      | Tb927.7.320  | RBP8                                                              | 0.92                      | 0.36 |                     |
| Enzyme          | Tb07.5F10.450      | Tb927.7.4130 | Glycosyl hydrolase                                                | not analyzed (repetitive) |      |                     |
|                 | Tb10.70.5230       |              | Metacaspase MCA4                                                  | 1.01                      | 0.52 |                     |
|                 | Tb11.02.0730       |              | Metacaspase                                                       | 8.42                      | 1.00 |                     |
| Unknown         | Tb05.25N21.20      | Tb927.5.310  | hypothetical protein                                              | 11.57                     | 1.00 |                     |
|                 | Tb05.26C7.190,220  | Tb927.5.4570 | hypothetical protein                                              | not analyzed (repetitive) |      |                     |
|                 | Tb10.6k15.0940     |              | hypothetical protein                                              | 19.23                     | 1.00 |                     |
|                 | Tb11.01.3810       |              | hypothetical protein                                              | 0.45                      | 0.38 |                     |
|                 | Tb08.26A17.40      | Tb927.8.2260 | hypothetical protein                                              | not analyzed (repetitive) |      |                     |
|                 | Tb07.26A24.60      | Tb927.7.4920 | hypothetical protein                                              | 2.17                      | 1.00 |                     |
|                 | Tb10.70.3090       |              |                                                                   | 0.75                      | 0.03 | Brems ("weak data") |

# ALTERNATIVE CDS COORDINATES SUMMARY based on splice-site analyses

These summary data for revised ATG predictions are organized into three categories. The detailed data (XLSX files) can be obtained on request and will be available on the lab website soon. The last page has a short technical note on how the pdf file was made.

## CATEGORY 1

The tagging of a splice site downstream of the TrypDB-predicted ATG indicates that a downstream in-frame ATG must form the N-terminus of the protein. This situation could not have been predicted from the sequence alone. The number of sequence tag hits per gene overall ranges from 2 to 1,986. Data for genes with > 4 hits per gene or per SAS are considered highly reliable, but all the hits are unique for each sequenced tag, or quasi-unique where genes are present in multiple (usually but not always tandem) copies.

The table has been sorted first by the % of SAS hits that predict one specific internal ATG, then by chromosome and GeneID. In cases where there are only a few sequence tag hits per gene (or per SAS), the data should be viewed with caution and checked if it is an important gene for you.

There are 488 genes for which 609 SAS predict ORF start sites internal to the originally predicted ORF.

Of these 488, there are 321 genes where > 95% of the predicted SAS (2–1,986 sequence tag hits per gene) are inside the originally predicted ORF. Of these, 281 have more than 4 hits per gene, so are likely to be highly reliable. On the other hand, there could be other undetected SAS that are consistent with the originally predicted ATG, in which case there would be the potential for alternative forms of the protein with different initiation sites. This is the case for 167 of the genes (towards the bottom of the table) for which the first internal in-frame ATG is predicted but this does not account for 100% of the predictions: the others were consistent with the originally predicted ATG. There are 4 genes that have 2 entries in the table, where there are two predicted alternative internal ATGs. These are highlighted.

| Chr | Gene         | <u>TrypDB</u>                | <u>TriTrypDB</u>             | SAS<br>per<br>Gene | SAS %<br>for ATG | Hits<br>per<br>Gene | ATG<br>Diff | ORF<br>Length<br>True | ORF Start<br>True | Abbreviated Description from TrypDB      |
|-----|--------------|------------------------------|------------------------------|--------------------|------------------|---------------------|-------------|-----------------------|-------------------|------------------------------------------|
| 1   | Tb927.1.3810 | <a href="#">Tb927.1.3810</a> | <a href="#">Tb927.1.3810</a> | 1                  | 100              | 55                  | +96         | 363                   | 815129            | hypothetical protein, conserved          |
| 1   | Tb927.1.3840 | <a href="#">Tb927.1.3840</a> | <a href="#">Tb927.1.3840</a> | 1                  | 100              | 2                   | +141        | 1830                  | 818737            | hypothetical protein, conserved          |
| 1   | Tb927.1.5100 | <a href="#">Tb927.1.5100</a> | <a href="#">Tb927.1.5100</a> | 1                  | 100              | 6                   | +15         | 1362                  | 1018107           | expression site-associated gene 2protein |
| 1   | Tb927.1.880  | <a href="#">Tb927.1.880</a>  | <a href="#">Tb927.1.880</a>  | 1                  | 100              | 7                   | +24         | 13779                 | 278162            | hypothetical protein, conserved          |
| 2   | Tb927.2.2390 | <a href="#">Tb927.2.2390</a> | <a href="#">Tb927.2.2390</a> | 1                  | 100              | 74                  | +33         | 486                   | 469891            | hypothetical protein, conserved          |
| 2   | Tb927.2.2950 | <a href="#">Tb927.2.2950</a> | <a href="#">Tb927.2.2950</a> | 1                  | 100              | 4                   | +75         | 2868                  | 560909            | hypothetical protein, conserved          |
| 2   | Tb927.2.3400 | <a href="#">Tb927.2.3400</a> | <a href="#">Tb927.2.3400</a> | 1                  | 100              | 10                  | +147        | 1005                  | 629941            | hypothetical protein, conserved          |

|   |              |                              |                              |   |     |     |      |      |         |                                     |
|---|--------------|------------------------------|------------------------------|---|-----|-----|------|------|---------|-------------------------------------|
| 2 | Tb927.2.5080 | <a href="#">Tb927.2.5080</a> | <a href="#">Tb927.2.5080</a> | 1 | 100 | 10  | +138 | 1410 | 898797  | hypothetical protein, conserved     |
| 2 | Tb927.2.5220 | <a href="#">Tb927.2.5220</a> | <a href="#">Tb927.2.5220</a> | 1 | 100 | 14  | +108 | 1056 | 918441  | hypothetical protein, conserved     |
| 2 | Tb927.2.5900 | <a href="#">Tb927.2.5900</a> | <a href="#">Tb927.2.5900</a> | 2 | 100 | 14  | +78  | 3174 | 1073575 | hypothetical protein, conserved     |
| 2 | Tb927.2.6070 | <a href="#">Tb927.2.6070</a> | <a href="#">Tb927.2.6070</a> | 1 | 100 | 52  | +297 | 858  | 1096360 | hypothetical protein, conserved     |
| 3 | Tb927.3.1260 | <a href="#">Tb927.3.1260</a> | <a href="#">Tb927.3.1260</a> | 2 | 100 | 44  | +39  | 582  | 312271  | hypothetical protein, conserved     |
| 3 | Tb927.3.1280 | <a href="#">Tb927.3.1280</a> | <a href="#">Tb927.3.1280</a> | 1 | 100 | 4   | +276 | 1227 | 315296  | hypothetical protein, conserved     |
| 3 | Tb927.3.2130 | <a href="#">Tb927.3.2130</a> | <a href="#">Tb927.3.2130</a> | 1 | 100 | 14  | +246 | 2241 | 562629  | hypothetical protein, conserved     |
| 3 | Tb927.3.2850 | <a href="#">Tb927.3.2850</a> | <a href="#">Tb927.3.2850</a> | 1 | 100 | 3   | +222 | 615  | 737813  | hypothetical protein, conserved     |
| 3 | Tb927.3.3050 | <a href="#">Tb927.3.3050</a> | <a href="#">Tb927.3.3050</a> | 1 | 100 | 5   | +60  | 3036 | 781790  | hypothetical protein, conserved     |
| 3 | Tb927.3.3200 | <a href="#">Tb927.3.3200</a> | <a href="#">Tb927.3.3200</a> | 1 | 100 | 51  | +144 | 1053 | 828109  | hypothetical protein, conserved     |
| 3 | Tb927.3.3250 | <a href="#">Tb927.3.3250</a> | <a href="#">Tb927.3.3250</a> | 1 | 100 | 3   | +33  | 1011 | 837376  | hypothetical protein, conserved     |
| 3 | Tb927.3.3350 | <a href="#">Tb927.3.3350</a> | <a href="#">Tb927.3.3350</a> | 1 | 100 | 2   | +195 | 1557 | 860253  | hypothetical protein, conserved     |
| 3 | Tb927.3.3650 | <a href="#">Tb927.3.3650</a> | <a href="#">Tb927.3.3650</a> | 1 | 100 | 8   | +135 | 1674 | 1022896 | hypothetical protein, conserved     |
| 3 | Tb927.3.3860 | <a href="#">Tb927.3.3860</a> | <a href="#">Tb927.3.3860</a> | 1 | 100 | 20  | +99  | 3750 | 1071443 | lipase, ,triacylglycerol lipase     |
| 3 | Tb927.3.4030 | <a href="#">Tb927.3.4030</a> | <a href="#">Tb927.3.4030</a> | 1 | 100 | 29  | +15  | 3642 | 1139026 | hypothetical protein, conserved     |
| 3 | Tb927.3.4120 | <a href="#">Tb927.3.4120</a> | <a href="#">Tb927.3.4120</a> | 1 | 100 | 16  | +39  | 2034 | 1162824 | hypothetical protein, conserved     |
| 3 | Tb927.3.4190 | <a href="#">Tb927.3.4190</a> | <a href="#">Tb927.3.4190</a> | 1 | 100 | 12  | +252 | 1938 | 1178152 | endosomal integral membrane protein |
| 3 | Tb927.3.4210 | <a href="#">Tb927.3.4210</a> | <a href="#">Tb927.3.4210</a> | 1 | 100 | 10  | +117 | 5313 | 1185220 | hypothetical protein, conserved     |
| 3 | Tb927.3.4350 | <a href="#">Tb927.3.4350</a> | <a href="#">Tb927.3.4350</a> | 1 | 100 | 3   | +69  | 2325 | 1223193 | hypothetical protein, conserved     |
| 3 | Tb927.3.4400 | <a href="#">Tb927.3.4400</a> | <a href="#">Tb927.3.4400</a> | 1 | 100 | 6   | +81  | 1083 | 1240558 | hypothetical protein, conserved     |
| 3 | Tb927.3.5170 | <a href="#">Tb927.3.5170</a> | <a href="#">Tb927.3.5170</a> | 1 | 100 | 12  | +42  | 1242 | 1452148 | hypothetical protein, conserved     |
| 3 | Tb927.3.650  | <a href="#">Tb927.3.650</a>  | <a href="#">Tb927.3.650</a>  | 1 | 100 | 64  | +69  | 189  | 161942  | hypothetical protein, conserved     |
| 3 | Tb927.3.840  | <a href="#">Tb927.3.840</a>  | <a href="#">Tb927.3.840</a>  | 1 | 100 | 2   | +99  | 1068 | 196552  | hypothetical protein, conserved     |
| 4 | Tb927.4.1630 | <a href="#">Tb927.4.1630</a> | <a href="#">Tb927.4.1630</a> | 1 | 100 | 40  | +99  | 2112 | 418548  | ribosomal RNA processing protein 6  |
| 4 | Tb927.4.1790 | <a href="#">Tb927.4.1790</a> | <a href="#">Tb927.4.1790</a> | 1 | 100 | 966 | +153 | 1290 | 449754  | ribosomal protein L3,               |
| 4 | Tb927.4.1960 | <a href="#">Tb927.4.1960</a> | <a href="#">Tb927.4.1960</a> | 1 | 100 | 13  | +81  | 1044 | 496987  | hypothetical protein, conserved     |
| 4 | Tb927.4.2340 | <a href="#">Tb927.4.2340</a> | <a href="#">Tb927.4.2340</a> | 1 | 100 | 9   | +39  | 1539 | 606859  | hypothetical protein, conserved     |
| 4 | Tb927.4.2980 | <a href="#">Tb927.4.2980</a> | <a href="#">Tb927.4.2980</a> | 1 | 100 | 2   | +165 | 660  | 790179  | hypothetical protein, conserved     |

|   |              |                              |                              |   |     |     |      |      |         |                                            |
|---|--------------|------------------------------|------------------------------|---|-----|-----|------|------|---------|--------------------------------------------|
| 4 | Tb927.4.3500 | <a href="#">Tb927.4.3500</a> | <a href="#">Tb927.4.3500</a> | 3 | 100 | 144 | +198 | 531  | 905104  | hypothetical protein, conserved            |
| 4 | Tb927.4.3720 | <a href="#">Tb927.4.3720</a> | <a href="#">Tb927.4.3720</a> | 2 | 100 | 30  | +174 | 690  | 938762  | hypothetical protein, conserved            |
| 4 | Tb927.4.4160 | <a href="#">Tb927.4.4160</a> | <a href="#">Tb927.4.4160</a> | 1 | 100 | 14  | +57  | 2691 | 1103944 | hypothetical protein, conserved            |
| 4 | Tb927.4.4630 | <a href="#">Tb927.4.4630</a> | <a href="#">Tb927.4.4630</a> | 2 | 100 | 35  | +132 | 366  | 1278372 | hypothetical protein, conserved            |
| 4 | Tb927.4.4680 | <a href="#">Tb927.4.4680</a> | <a href="#">Tb927.4.4680</a> | 1 | 100 | 12  | +123 | 537  | 1291889 | hypothetical protein, conserved            |
| 4 | Tb927.4.4950 | <a href="#">Tb927.4.4950</a> | <a href="#">Tb927.4.4950</a> | 1 | 100 | 19  | +165 | 1713 | 1360338 | hypothetical protein, conserved            |
| 4 | Tb927.4.510  | <a href="#">Tb927.4.510</a>  | <a href="#">Tb927.4.510</a>  | 2 | 100 | 24  | +120 | 318  | 144483  | hypothetical protein, conserved            |
| 4 | Tb927.4.5360 | <a href="#">Tb927.4.5360</a> | <a href="#">Tb927.4.5360</a> | 1 | 100 | 6   | +75  | 531  | 1459777 | hypothetical protein, conserved            |
| 4 | Tb927.4.570  | <a href="#">Tb927.4.570</a>  | <a href="#">Tb927.4.570</a>  | 1 | 100 | 5   | +45  | 1752 | 166888  | hypothetical protein, conserved            |
| 4 | Tb927.4.720  | <a href="#">Tb927.4.720</a>  | <a href="#">Tb927.4.720</a>  | 1 | 100 | 107 | +192 | 318  | 203329  | hypothetical protein, conserved            |
| 4 | Tb927.4.830  | <a href="#">Tb927.4.830</a>  | <a href="#">Tb927.4.830</a>  | 2 | 100 | 47  | +192 | 291  | 233063  | hypothetical protein, conserved            |
| 5 | Tb927.5.1140 | <a href="#">Tb927.5.1140</a> | <a href="#">Tb927.5.1140</a> | 1 | 100 | 11  | +90  | 1887 | 388120  | choline/ethanolamine kinase,               |
| 5 | Tb927.5.120  | <a href="#">Tb927.5.120</a>  | <a href="#">Tb927.5.120</a>  | 1 | 100 | 3   | +102 | 774  | 12993   | expression site-associated gene 9          |
| 5 | Tb927.5.1900 | <a href="#">Tb927.5.1900</a> | <a href="#">Tb927.5.1900</a> | 3 | 100 | 35  | +216 | 1833 | 589244  | hypothetical protein, conserved            |
| 5 | Tb927.5.2580 | <a href="#">Tb927.5.2580</a> | <a href="#">Tb927.5.2580</a> | 1 | 100 | 15  | +276 | 888  | 828611  | hypothetical protein, conserved            |
| 5 | Tb927.5.2740 | <a href="#">Tb927.5.2740</a> | <a href="#">Tb927.5.2740</a> | 1 | 100 | 14  | +186 | 1440 | 865523  | hypothetical protein, conserved            |
| 5 | Tb927.5.3180 | <a href="#">Tb927.5.3180</a> | <a href="#">Tb927.5.3180</a> | 2 | 100 | 9   | +42  | 540  | 994488  | hypothetical protein, conserved            |
| 5 | Tb927.5.3680 | <a href="#">Tb927.5.3680</a> | <a href="#">Tb927.5.3680</a> | 1 | 100 | 3   | +291 | 771  | 1155314 | hypothetical protein, conserved            |
| 5 | Tb927.5.3700 | <a href="#">Tb927.5.3700</a> | <a href="#">Tb927.5.3700</a> | 1 | 100 | 46  | +87  | 879  | 1158374 | hypothetical protein, conserved            |
| 5 | Tb927.5.4100 | <a href="#">Tb927.5.4100</a> | <a href="#">Tb927.5.4100</a> | 1 | 100 | 6   | +102 | 1443 | 1257284 | hypothetical protein, conserved            |
| 5 | Tb927.5.4340 | <a href="#">Tb927.5.4340</a> | <a href="#">Tb927.5.4340</a> | 1 | 100 | 2   | +93  | 1758 | 1296030 | hypothetical protein, conserved            |
| 5 | Tb927.5.660  | <a href="#">Tb927.5.660</a>  | <a href="#">Tb927.5.660</a>  | 1 | 100 | 9   | +267 | 1206 | 230069  | hypothetical protein                       |
| 5 | Tb927.5.920  | <a href="#">Tb927.5.920</a>  | <a href="#">Tb927.5.920</a>  | 2 | 100 | 15  | +165 | 1350 | 307331  | hypothetical protein, conserved            |
| 6 | Tb927.6.1230 | <a href="#">Tb927.6.1230</a> | <a href="#">Tb927.6.1230</a> | 1 | 100 | 9   | +96  | 1251 | 467087  | kinetoplastid-specific phosphatase         |
| 6 | Tb927.6.1280 | <a href="#">Tb927.6.1280</a> | <a href="#">Tb927.6.1280</a> | 2 | 100 | 47  | +81  | 900  | 472687  | translation initiation factor eIF-2B alpha |
| 6 | Tb927.6.1420 | <a href="#">Tb927.6.1420</a> | <a href="#">Tb927.6.1420</a> | 1 | 100 | 47  | +315 | 432  | 508600  | hypothetical protein, conserved            |
| 6 | Tb927.6.1440 | <a href="#">Tb927.6.1440</a> | <a href="#">Tb927.6.1440</a> | 2 | 100 | 17  | +132 | 777  | 512568  | hypothetical protein, conserved            |
| 6 | Tb927.6.1680 | <a href="#">Tb927.6.1680</a> | <a href="#">Tb927.6.1680</a> | 1 | 100 | 11  | +99  | 1575 | 569285  | zinc finger protein,                       |

|   |              |                              |                              |   |     |    |      |      |         |                                            |
|---|--------------|------------------------------|------------------------------|---|-----|----|------|------|---------|--------------------------------------------|
| 6 | Tb927.6.1860 | <a href="#">Tb927.6.1860</a> | <a href="#">Tb927.6.1860</a> | 1 | 100 | 60 | +204 | 825  | 620391  | hypothetical protein, conserved            |
| 6 | Tb927.6.2150 | <a href="#">Tb927.6.2150</a> | <a href="#">Tb927.6.2150</a> | 1 | 100 | 17 | +156 | 1644 | 685795  | cell division cycle protein 16,            |
| 6 | Tb927.6.2480 | <a href="#">Tb927.6.2480</a> | <a href="#">Tb927.6.2480</a> | 1 | 100 | 52 | +123 | 1038 | 757526  | chaperone protein DNAJ,                    |
| 6 | Tb927.6.2580 | <a href="#">Tb927.6.2580</a> | <a href="#">Tb927.6.2580</a> | 1 | 100 | 5  | +279 | 1815 | 785293  | hypothetical protein, conserved            |
| 6 | Tb927.6.2730 | <a href="#">Tb927.6.2730</a> | <a href="#">Tb927.6.2730</a> | 1 | 100 | 14 | +177 | 5358 | 817710  | hypothetical protein, conserved            |
| 6 | Tb927.6.3200 | <a href="#">Tb927.6.3200</a> | <a href="#">Tb927.6.3200</a> | 1 | 100 | 29 | +252 | 336  | 951442  | hypothetical protein, conserved            |
| 6 | Tb927.6.3210 | <a href="#">Tb927.6.3210</a> | <a href="#">Tb927.6.3210</a> | 1 | 100 | 28 | +144 | 534  | 952233  | hypothetical protein, conserved            |
| 6 | Tb927.6.3620 | <a href="#">Tb927.6.3620</a> | <a href="#">Tb927.6.3620</a> | 1 | 100 | 4  | +42  | 1230 | 1081287 | zinc finger protein,                       |
| 6 | Tb927.6.3700 | <a href="#">Tb927.6.3700</a> | <a href="#">Tb927.6.3700</a> | 1 | 100 | 31 | +60  | 771  | 1104213 | hypothetical protein, conserved            |
| 6 | Tb927.6.4120 | <a href="#">Tb927.6.4120</a> | <a href="#">Tb927.6.4120</a> | 3 | 100 | 12 | +234 | 1182 | 1191616 | GTPase activating protein,                 |
| 6 | Tb927.6.4150 | <a href="#">Tb927.6.4150</a> | <a href="#">Tb927.6.4150</a> | 2 | 100 | 26 | +162 | 642  | 1197079 | hypothetical protein, conserved            |
| 6 | Tb927.6.4170 | <a href="#">Tb927.6.4170</a> | <a href="#">Tb927.6.4170</a> | 1 | 100 | 5  | +108 | 1194 | 1200553 | hypothetical protein, conserved            |
| 6 | Tb927.6.4190 | <a href="#">Tb927.6.4190</a> | <a href="#">Tb927.6.4190</a> | 1 | 100 | 3  | +9   | 1647 | 1204255 | hypothetical protein, conserved            |
| 6 | Tb927.6.4200 | <a href="#">Tb927.6.4200</a> | <a href="#">Tb927.6.4200</a> | 1 | 100 | 42 | +315 | 1335 | 1205935 | hypothetical protein, conserved            |
| 6 | Tb927.6.4330 | <a href="#">Tb927.6.4330</a> | <a href="#">Tb927.6.4330</a> | 2 | 100 | 39 | +99  | 543  | 1225722 | hypothetical protein, conserved            |
| 6 | Tb927.6.4350 | <a href="#">Tb927.6.4350</a> | <a href="#">Tb927.6.4350</a> | 2 | 100 | 17 | +114 | 864  | 1228040 | ribosomal RNA assembly protein,            |
| 6 | Tb927.6.4370 | <a href="#">Tb927.6.4370</a> | <a href="#">Tb927.6.4370</a> | 1 | 100 | 9  | +90  | 1521 | 1231363 | eukaryotic translation initiation factor 3 |
| 6 | Tb927.6.4600 | <a href="#">Tb927.6.4600</a> | <a href="#">Tb927.6.4600</a> | 1 | 100 | 19 | +129 | 2901 | 1287787 | pre-mRNA splicing RNA helicase             |
| 6 | Tb927.6.4960 | <a href="#">Tb927.6.4960</a> | <a href="#">Tb927.6.4960</a> | 1 | 100 | 34 | +156 | 786  | 1366188 | zinc finger-domain protein,                |
| 6 | Tb927.6.880  | <a href="#">Tb927.6.880</a>  | <a href="#">Tb927.6.880</a>  | 1 | 100 | 13 | +216 | 1395 | 379018  | hypothetical protein, conserved            |
| 7 | Tb927.7.1700 | <a href="#">Tb927.7.1700</a> | <a href="#">Tb927.7.1700</a> | 2 | 100 | 12 | +276 | 1659 | 423088  | hypothetical protein, conserved            |
| 7 | Tb927.7.1770 | <a href="#">Tb927.7.1770</a> | <a href="#">Tb927.7.1770</a> | 1 | 100 | 5  | +12  | 1818 | 434546  | hypothetical protein, conserved            |
| 7 | Tb927.7.190  | <a href="#">Tb927.7.190</a>  | <a href="#">Tb927.7.190</a>  | 2 | 100 | 26 | +174 | 2058 | 34206   | thimet oligopeptidase A, putativ           |
| 7 | Tb927.7.270  | <a href="#">Tb927.7.270</a>  | <a href="#">Tb927.7.270</a>  | 1 | 100 | 15 | +201 | 1113 | 47961   | ribosome biogenesis protein,               |
| 7 | Tb927.7.3310 | <a href="#">Tb927.7.3310</a> | <a href="#">Tb927.7.3310</a> | 1 | 100 | 5  | +84  | 987  | 854846  | hypothetical protein, conserved            |
| 7 | Tb927.7.340  | <a href="#">Tb927.7.340</a>  | <a href="#">Tb927.7.340</a>  | 1 | 100 | 2  | +105 | 984  | 62510   | hypothetical protein, conserved            |
| 7 | Tb927.7.3870 | <a href="#">Tb927.7.3870</a> | <a href="#">Tb927.7.3870</a> | 1 | 100 | 6  | +63  | 771  | 1010286 | hypothetical protein, conserved            |
| 7 | Tb927.7.4220 | <a href="#">Tb927.7.4220</a> | <a href="#">Tb927.7.4220</a> | 1 | 100 | 25 | +15  | 3318 | 1121347 | hypothetical protein, conserved            |

|   |              |                              |                              |   |     |     |      |      |         |                                                       |
|---|--------------|------------------------------|------------------------------|---|-----|-----|------|------|---------|-------------------------------------------------------|
| 7 | Tb927.7.4970 | <a href="#">Tb927.7.4970</a> | <a href="#">Tb927.7.4970</a> | 1 | 100 | 29  | +120 | 1146 | 1318106 | glutamine synthetase,                                 |
| 7 | Tb927.7.5700 | <a href="#">Tb927.7.5700</a> | <a href="#">Tb927.7.5700</a> | 1 | 100 | 28  | +255 | 963  | 1540476 | hypothetical protein, conserved                       |
| 7 | Tb927.7.5740 | <a href="#">Tb927.7.5740</a> | <a href="#">Tb927.7.5740</a> | 1 | 100 | 12  | +207 | 1500 | 1548341 | hypothetical protein, conserved                       |
| 7 | Tb927.7.5890 | <a href="#">Tb927.7.5890</a> | <a href="#">Tb927.7.5890</a> | 1 | 100 | 9   | +231 | 2001 | 1582960 | hypothetical protein, conserved                       |
| 7 | Tb927.7.720  | <a href="#">Tb927.7.720</a>  | <a href="#">Tb927.7.720</a>  | 1 | 100 | 10  | +165 | 5214 | 163998  | hypothetical protein, conserved                       |
| 8 | Tb927.8.1270 | <a href="#">Tb927.8.1270</a> | <a href="#">Tb927.8.1270</a> | 1 | 100 | 37  | +228 | 1461 | 402970  | hypothetical protein, conserved                       |
| 8 | Tb927.8.1730 | <a href="#">Tb927.8.1730</a> | <a href="#">Tb927.8.1730</a> | 1 | 100 | 27  | +69  | 384  | 572989  | hypothetical protein, conserved                       |
| 8 | Tb927.8.1800 | <a href="#">Tb927.8.1800</a> | <a href="#">Tb927.8.1800</a> | 1 | 100 | 15  | +243 | 1506 | 591487  | hypothetical protein, conserved                       |
| 8 | Tb927.8.2210 | <a href="#">Tb927.8.2210</a> | <a href="#">Tb927.8.2210</a> | 2 | 100 | 31  | +303 | 807  | 677937  | pteridine reductase                                   |
| 8 | Tb927.8.2230 | <a href="#">Tb927.8.2230</a> | <a href="#">Tb927.8.2230</a> | 1 | 100 | 19  | +114 | 1023 | 684928  | hypothetical protein, conserved                       |
| 8 | Tb927.8.2870 | <a href="#">Tb927.8.2870</a> | <a href="#">Tb927.8.2870</a> | 1 | 100 | 4   | +558 | 2247 | 870833  | hypothetical protein, conserved                       |
| 8 | Tb927.8.3100 | <a href="#">Tb927.8.3100</a> | <a href="#">Tb927.8.3100</a> | 3 | 100 | 58  | +72  | 1500 | 929087  | coronin,                                              |
| 8 | Tb927.8.3320 | <a href="#">Tb927.8.3320</a> | <a href="#">Tb927.8.3320</a> | 3 | 100 | 250 | +201 | 1209 | 997489  | hypothetical protein, conserved                       |
| 8 | Tb927.8.3860 | <a href="#">Tb927.8.3860</a> | <a href="#">Tb927.8.3860</a> | 1 | 100 | 15  | +24  | 1251 | 1151744 | hypothetical protein, conserved,WD-repeat             |
| 8 | Tb927.8.4030 | <a href="#">Tb927.8.4030</a> | <a href="#">Tb927.8.4030</a> | 1 | 100 | 33  | +60  | 639  | 1200385 | class I transcription factor A, subunit 5a (CITFA-5a) |
| 8 | Tb927.8.4080 | <a href="#">Tb927.8.4080</a> | <a href="#">Tb927.8.4080</a> | 1 | 100 | 28  | +60  | 639  | 1210003 | class I transcription factor A (CITFA-5a)             |
| 8 | Tb927.8.4130 | <a href="#">Tb927.8.4130</a> | <a href="#">Tb927.8.4130</a> | 1 | 100 | 33  | +60  | 636  | 1219615 | class I transcription factor A (CITFA-5b)             |
| 8 | Tb927.8.4140 | <a href="#">Tb927.8.4140</a> | <a href="#">Tb927.8.4140</a> | 2 | 100 | 4   | +33  | 1215 | 1221082 | hypothetical protein, conserved                       |
| 8 | Tb927.8.4490 | <a href="#">Tb927.8.4490</a> | <a href="#">Tb927.8.4490</a> | 1 | 100 | 10  | +90  | 1266 | 1328621 | hypothetical protein                                  |
| 8 | Tb927.8.5810 | <a href="#">Tb927.8.5810</a> | <a href="#">Tb927.8.5810</a> | 1 | 100 | 3   | +57  | 858  | 1710893 | mitochondrial carrier protein,                        |
| 8 | Tb927.8.5980 | <a href="#">Tb927.8.5980</a> | <a href="#">Tb927.8.5980</a> | 1 | 100 | 12  | +48  | 2412 | 1751038 | TFIIH complex helicase                                |
| 8 | Tb927.8.5990 | <a href="#">Tb927.8.5990</a> | <a href="#">Tb927.8.5990</a> | 1 | 100 | 26  | +342 | 1575 | 1753999 | hypothetical protein, conserved                       |
| 8 | Tb927.8.6960 | <a href="#">Tb927.8.6960</a> | <a href="#">Tb927.8.6960</a> | 1 | 100 | 8   | +75  | 1158 | 2006213 | hypothetical protein, conserved                       |
| 8 | Tb927.8.7010 | <a href="#">Tb927.8.7010</a> | <a href="#">Tb927.8.7010</a> | 1 | 100 | 38  | +84  | 609  | 2017120 | chaperone protein DNAJ,                               |
| 8 | Tb927.8.7190 | <a href="#">Tb927.8.7190</a> | <a href="#">Tb927.8.7190</a> | 1 | 100 | 10  | +153 | 939  | 2065377 | hypothetical protein                                  |
| 8 | Tb927.8.740  | <a href="#">Tb927.8.740</a>  | <a href="#">Tb927.8.740</a>  | 1 | 100 | 6   | +261 | 159  | 206277  | nucleolar RNA-binding protein, truncated              |
| 8 | Tb927.8.8070 | <a href="#">Tb927.8.8070</a> | <a href="#">Tb927.8.8070</a> | 2 | 100 | 10  | +72  | 1581 | 2388868 | hypothetical protein, conserved                       |

|   |               |                               |                               |   |     |    |      |      |         |                                          |
|---|---------------|-------------------------------|-------------------------------|---|-----|----|------|------|---------|------------------------------------------|
| 8 | Tb927.8.8110  | <a href="#">Tb927.8.8110</a>  | <a href="#">Tb927.8.8110</a>  | 2 | 100 | 11 | +72  | 1728 | 2396775 | hypothetical protein, conserved          |
| 8 | Tb927.8.920   | <a href="#">Tb927.8.920</a>   | <a href="#">Tb927.8.920</a>   | 1 | 100 | 29 | +36  | 483  | 286356  | ubiquitin-protein ligase                 |
| 9 | Tb09.160.0620 | <a href="#">Tb09.160.0620</a> | <a href="#">Tb09.160.0620</a> | 1 | 100 | 41 | +252 | 672  | 384124  | peroxisomal membrane protein 4,          |
| 9 | Tb09.160.0890 | <a href="#">Tb09.160.0890</a> | <a href="#">Tb09.160.0890</a> | 1 | 100 | 11 | +270 | 1245 | 469540  | hypothetical protein, conserved          |
| 9 | Tb09.160.1020 | <a href="#">Tb09.160.1020</a> | <a href="#">Tb09.160.1020</a> | 2 | 100 | 20 | +282 | 2190 | 498589  | hypothetical protein, conserved          |
| 9 | Tb09.160.2210 | <a href="#">Tb09.160.2210</a> | <a href="#">Tb09.160.2210</a> | 1 | 100 | 59 | +87  | 555  | 672585  | glutaredoxin-like protein                |
| 9 | Tb09.160.3490 | <a href="#">Tb09.160.3490</a> | <a href="#">Tb09.160.3490</a> | 1 | 100 | 7  | +51  | 669  | 842669  | hypothetical protein, conserved          |
| 9 | Tb09.160.3560 | <a href="#">Tb09.160.3560</a> | <a href="#">Tb09.160.3560</a> | 1 | 100 | 15 | +198 | 1158 | 850860  | hypothetical protein, conserved          |
| 9 | Tb09.160.3730 | <a href="#">Tb09.160.3730</a> | <a href="#">Tb09.160.3730</a> | 1 | 100 | 52 | +150 | 1734 | 867682  | glutaminyl-tRNA synthetase,              |
| 9 | Tb09.160.3910 | <a href="#">Tb09.160.3910</a> | <a href="#">Tb09.160.3910</a> | 3 | 100 | 16 | +51  | 657  | 888993  | hypothetical protein, conserved          |
| 9 | Tb09.160.4690 | <a href="#">Tb09.160.4690</a> | <a href="#">Tb09.160.4690</a> | 1 | 100 | 3  | +192 | 255  | 1007470 | hypothetical protein, conserved          |
| 9 | Tb09.160.5040 | <a href="#">Tb09.160.5040</a> | <a href="#">Tb09.160.5040</a> | 1 | 100 | 48 | +216 | 204  | 1078079 | hypothetical protein, conserved          |
| 9 | Tb09.160.5130 | <a href="#">Tb09.160.5130</a> | <a href="#">Tb09.160.5130</a> | 1 | 100 | 27 | +129 | 1485 | 1093818 | hypothetical protein, conserved          |
| 9 | Tb09.160.5180 | <a href="#">Tb09.160.5180</a> | <a href="#">Tb09.160.5180</a> | 2 | 100 | 12 | +246 | 1104 | 1098892 | hypothetical protein, conserved          |
| 9 | Tb09.160.5310 | <a href="#">Tb09.160.5310</a> | <a href="#">Tb09.160.5310</a> | 1 | 100 | 18 | +342 | 552  | 1124814 | hypothetical protein, conserved          |
| 9 | Tb09.211.0200 | <a href="#">Tb09.211.0200</a> | <a href="#">Tb09.211.0200</a> | 1 | 100 | 11 | +111 | 1497 | 1301035 | hypothetical protein, conserved          |
| 9 | Tb09.211.0210 | <a href="#">Tb09.211.0210</a> | <a href="#">Tb09.211.0210</a> | 1 | 100 | 4  | +150 | 1296 | 1302639 | atypical dual specificity phosphatase    |
| 9 | Tb09.211.0800 | <a href="#">Tb09.211.0800</a> | <a href="#">Tb09.211.0800</a> | 1 | 100 | 5  | +135 | 1146 | 1405571 | hypothetical protein, conserved          |
| 9 | Tb09.211.0990 | <a href="#">Tb09.211.0990</a> | <a href="#">Tb09.211.0990</a> | 1 | 100 | 23 | +150 | 774  | 1445866 | hypothetical protein, conserved          |
| 9 | Tb09.211.1270 | <a href="#">Tb09.211.1270</a> | <a href="#">Tb09.211.1270</a> | 1 | 100 | 19 | +81  | 705  | 1491509 | hypothetical protein, conserved          |
| 9 | Tb09.211.1600 | <a href="#">Tb09.211.1600</a> | <a href="#">Tb09.211.1600</a> | 1 | 100 | 58 | +81  | 867  | 1540043 | hypothetical protein, conserved          |
| 9 | Tb09.211.1820 | <a href="#">Tb09.211.1820</a> | <a href="#">Tb09.211.1820</a> | 1 | 100 | 14 | +18  | 6723 | 1587284 | DNA polymerase epsilon catalytic subunit |
| 9 | Tb09.211.1850 | <a href="#">Tb09.211.1850</a> | <a href="#">Tb09.211.1850</a> | 4 | 100 | 31 | +189 | 1032 | 1593590 | hypothetical protein, conserved          |
| 9 | Tb09.211.2300 | <a href="#">Tb09.211.2300</a> | <a href="#">Tb09.211.2300</a> | 1 | 100 | 35 | +282 | 2106 | 1678138 | ATP-dependent DEAD/H RNA helicase        |
| 9 | Tb09.211.2620 | <a href="#">Tb09.211.2620</a> | <a href="#">Tb09.211.2620</a> | 3 | 100 | 47 | +150 | 438  | 1737006 | hypothetical protein, conserved          |
| 9 | Tb09.211.2680 | <a href="#">Tb09.211.2680</a> | <a href="#">Tb09.211.2680</a> | 1 | 100 | 16 | +234 | 1773 | 1747431 | hypothetical protein, conserved          |
| 9 | Tb09.211.2810 | <a href="#">Tb09.211.2810</a> | <a href="#">Tb09.211.2810</a> | 1 | 100 | 68 | +150 | 612  | 1770240 | hypothetical protein, conserved          |
| 9 | Tb09.211.3290 | <a href="#">Tb09.211.3290</a> | <a href="#">Tb09.211.3290</a> | 1 | 100 | 2  | +207 | 399  | 1858531 | hypothetical protein, conserved          |



|    |                |                                |                                |   |     |     |      |      |         |                                   |
|----|----------------|--------------------------------|--------------------------------|---|-----|-----|------|------|---------|-----------------------------------|
| 9  | Tb09.211.3330  | <a href="#">Tb09.211.3330</a>  | <a href="#">Tb09.211.3330</a>  | 3 | 100 | 146 | +105 | 1233 | 1867992 | cystathione gamma lyase,          |
| 9  | Tb09.211.3730  | <a href="#">Tb09.211.3730</a>  | <a href="#">Tb09.211.3730</a>  | 2 | 100 | 15  | +138 | 3300 | 1962089 | hypothetical protein, conserved   |
| 9  | Tb09.211.4150  | <a href="#">Tb09.211.4150</a>  | <a href="#">Tb09.211.4150</a>  | 2 | 100 | 14  | +192 | 1389 | 2047339 | hypothetical protein, conserved   |
| 9  | Tb09.211.4290  | <a href="#">Tb09.211.4290</a>  | <a href="#">Tb09.211.4290</a>  | 1 | 100 | 11  | +357 | 459  | 2083049 | hypothetical protein, conserved   |
| 9  | Tb09.211.4360  | <a href="#">Tb09.211.4360</a>  | <a href="#">Tb09.211.4360</a>  | 1 | 100 | 27  | +93  | 2727 | 2097146 | hypothetical protein, conserved   |
| 9  | Tb09.211.4550  | <a href="#">Tb09.211.4550</a>  | <a href="#">Tb09.211.4550</a>  | 1 | 100 | 340 | +165 | 495  | 2136533 | 60S ribosomal protein L12,        |
| 10 | Tb10.05.0040   | <a href="#">Tb10.05.0040</a>   | <a href="#">Tb10.05.0040</a>   | 1 | 100 | 31  | +219 | 2832 | 3252326 | hypothetical protein, conserved,  |
| 10 | Tb10.100.0150  | <a href="#">Tb10.100.0150</a>  | <a href="#">Tb10.100.0150</a>  | 1 | 100 | 5   | +105 | 234  | 81558   | hypothetical protein, conserved   |
| 10 | Tb10.100.0190  | <a href="#">Tb10.100.0190</a>  | <a href="#">Tb10.100.0190</a>  | 1 | 100 | 35  | +81  | 1677 | 86582   | pumillio RNA binding protein,     |
| 10 | Tb10.100.0200  | <a href="#">Tb10.100.0200</a>  | <a href="#">Tb10.100.0200</a>  | 1 | 100 | 22  | +183 | 396  | 91041   | hypothetical protein, conserved   |
| 10 | Tb10.20.0130   | <a href="#">Tb10.20.0130</a>   | <a href="#">Tb10.20.0130</a>   | 1 | 100 | 6   | +75  | 885  | 2059677 | legume-like lectin,               |
| 10 | Tb10.26.0570   | <a href="#">Tb10.26.0570</a>   | <a href="#">Tb10.26.0570</a>   | 1 | 100 | 22  | +123 | 1173 | 2706162 | hypothetical protein, conserved   |
| 10 | Tb10.26.0910   | <a href="#">Tb10.26.0910</a>   | <a href="#">Tb10.26.0910</a>   | 2 | 100 | 12  | +66  | 2934 | 2651263 | hypothetical protein, conserved   |
| 10 | Tb10.389.0270  | <a href="#">Tb10.389.0270</a>  | <a href="#">Tb10.389.0270</a>  | 1 | 100 | 10  | +252 | 1158 | 3138542 | actin related protein 2/3 complex |
| 10 | Tb10.389.0610  | <a href="#">Tb10.389.0610</a>  | <a href="#">Tb10.389.0610</a>  | 1 | 100 | 3   | +24  | 2793 | 3067008 | hypothetical protein, conserved   |
| 10 | Tb10.389.1330  | <a href="#">Tb10.389.1330</a>  | <a href="#">Tb10.389.1330</a>  | 2 | 100 | 40  | +156 | 1449 | 2937200 | membrane transporter protein,     |
| 10 | Tb10.389.1340  | <a href="#">Tb10.389.1340</a>  | <a href="#">Tb10.389.1340</a>  | 2 | 100 | 52  | +321 | 777  | 2934377 | hypothetical protein, conserved   |
| 10 | Tb10.61.0100   | <a href="#">Tb10.61.0100</a>   | <a href="#">Tb10.61.0100</a>   | 2 | 100 | 25  | +117 | 903  | 3900722 | protein kinase,                   |
| 10 | Tb10.61.2720   | <a href="#">Tb10.61.2720</a>   | <a href="#">Tb10.61.2720</a>   | 1 | 100 | 68  | +228 | 360  | 3360517 | hypothetical protein, conserved   |
| 10 | Tb10.6k15.0120 | <a href="#">Tb10.6k15.0120</a> | <a href="#">Tb10.6k15.0120</a> | 1 | 100 | 2   | +510 | 867  | 2462539 | hypothetical protein, conserved   |
| 10 | Tb10.6k15.0290 | <a href="#">Tb10.6k15.0290</a> | <a href="#">Tb10.6k15.0290</a> | 2 | 100 | 27  | +258 | 606  | 2426357 | hypothetical protein, conserved   |
| 10 | Tb10.6k15.0300 | <a href="#">Tb10.6k15.0300</a> | <a href="#">Tb10.6k15.0300</a> | 2 | 100 | 14  | +240 | 1026 | 2425066 | hypothetical protein, conserved   |
| 10 | Tb10.6k15.1380 | <a href="#">Tb10.6k15.1380</a> | <a href="#">Tb10.6k15.1380</a> | 2 | 100 | 35  | +57  | 2001 | 2205911 | hypothetical protein, conserved   |
| 10 | Tb10.6k15.1910 | <a href="#">Tb10.6k15.1910</a> | <a href="#">Tb10.6k15.1910</a> | 1 | 100 | 63  | +96  | 768  | 2100023 | hypothetical protein, conserved   |
| 10 | Tb10.6k15.2360 | <a href="#">Tb10.6k15.2360</a> | <a href="#">Tb10.6k15.2360</a> | 2 | 100 | 34  | +51  | 324  | 2006431 | hypothetical protein, conserved   |
| 10 | Tb10.6k15.2390 | <a href="#">Tb10.6k15.2390</a> | <a href="#">Tb10.6k15.2390</a> | 2 | 100 | 28  | +213 | 1230 | 2003454 | hypothetical protein, conserved   |
| 10 | Tb10.6k15.3480 | <a href="#">Tb10.6k15.3480</a> | <a href="#">Tb10.6k15.3480</a> | 1 | 100 | 13  | +270 | 687  | 1794645 | hypothetical protein, conserved   |
| 10 | Tb10.6k15.3740 | <a href="#">Tb10.6k15.3740</a> | <a href="#">Tb10.6k15.3740</a> | 1 | 100 | 2   | +276 | 1641 | 1745095 | hypothetical protein, conserved   |

|    |                |                                |                                |   |     |    |      |      |         |                                           |
|----|----------------|--------------------------------|--------------------------------|---|-----|----|------|------|---------|-------------------------------------------|
| 10 | Tb10.6k15.3750 | <a href="#">Tb10.6k15.3750</a> | <a href="#">Tb10.6k15.3750</a> | 2 | 100 | 12 | +189 | 999  | 1743357 | hypothetical protein, conserved           |
| 10 | Tb10.70.0630   | <a href="#">Tb10.70.0630</a>   | <a href="#">Tb10.70.0630</a>   | 3 | 100 | 49 | +180 | 1512 | 1568080 | aldehyde dehydrogenase,                   |
| 10 | Tb10.70.0770   | <a href="#">Tb10.70.0770</a>   | <a href="#">Tb10.70.0770</a>   | 1 | 100 | 4  | +198 | 1308 | 1535568 | hypothetical protein, conserved           |
| 10 | Tb10.70.1070   | <a href="#">Tb10.70.1070</a>   | <a href="#">Tb10.70.1070</a>   | 1 | 100 | 9  | +66  | 1371 | 1469019 | hypothetical protein, conserved           |
| 10 | Tb10.70.1510   | <a href="#">Tb10.70.1510</a>   | <a href="#">Tb10.70.1510</a>   | 2 | 100 | 19 | +144 | 1695 | 1381318 | endonuclease/exonuclease/phosphatase      |
| 10 | Tb10.70.2260   | <a href="#">Tb10.70.2260</a>   | <a href="#">Tb10.70.2260</a>   | 2 | 100 | 58 | +99  | 1314 | 1229282 | serine/threonine protein kinase           |
| 10 | Tb10.70.2280   | <a href="#">Tb10.70.2280</a>   | <a href="#">Tb10.70.2280</a>   | 1 | 100 | 19 | +120 | 1341 | 1226497 | hypothetical protein, conserved           |
| 10 | Tb10.70.2720   | <a href="#">Tb10.70.2720</a>   | <a href="#">Tb10.70.2720</a>   | 1 | 100 | 44 | +36  | 939  | 1156708 | mRNA capping methyltransferase,           |
| 10 | Tb10.70.2750   | <a href="#">Tb10.70.2750</a>   | <a href="#">Tb10.70.2750</a>   | 1 | 100 | 18 | +210 | 3156 | 1149961 | hypothetical protein, conserved           |
| 10 | Tb10.70.2760   | <a href="#">Tb10.70.2760</a>   | <a href="#">Tb10.70.2760</a>   | 1 | 100 | 21 | +81  | 903  | 1146336 | leucine carboxyl methyltransferase,       |
| 10 | Tb10.70.3440   | <a href="#">Tb10.70.3440</a>   | <a href="#">Tb10.70.3440</a>   | 1 | 100 | 5  | +156 | 2520 | 1029654 | phosphatidylinositol-4-phosphate 5-kinase |
| 10 | Tb10.70.3840   | <a href="#">Tb10.70.3840</a>   | <a href="#">Tb10.70.3840</a>   | 1 | 100 | 41 | +210 | 975  | 926750  | hypothetical protein, conserved           |
| 10 | Tb10.70.3860   | <a href="#">Tb10.70.3860</a>   | <a href="#">Tb10.70.3860</a>   | 2 | 100 | 22 | +135 | 1170 | 921068  | arginine N-methyltransferase,             |
| 10 | Tb10.70.4150   | <a href="#">Tb10.70.4150</a>   | <a href="#">Tb10.70.4150</a>   | 1 | 100 | 9  | +195 | 822  | 847231  | hypothetical protein, conserved           |
| 10 | Tb10.70.4430   | <a href="#">Tb10.70.4430</a>   | <a href="#">Tb10.70.4430</a>   | 1 | 100 | 32 | +228 | 717  | 801615  | hypothetical protein, conserved           |
| 10 | Tb10.70.5350   | <a href="#">Tb10.70.5350</a>   | <a href="#">Tb10.70.5350</a>   | 1 | 100 | 5  | +423 | 2751 | 608536  | hypothetical protein, conserved           |
| 10 | Tb10.70.6150   | <a href="#">Tb10.70.6150</a>   | <a href="#">Tb10.70.6150</a>   | 1 | 100 | 20 | +105 | 729  | 463611  | hypothetical protein, conserved           |
| 10 | Tb10.70.6770   | <a href="#">Tb10.70.6770</a>   | <a href="#">Tb10.70.6770</a>   | 1 | 100 | 47 | +198 | 252  | 343784  | hypothetical protein, conserved           |
| 10 | Tb10.70.7500   | <a href="#">Tb10.70.7500</a>   | <a href="#">Tb10.70.7500</a>   | 1 | 100 | 13 | +39  | 861  | 180599  | hypothetical protein, conserved           |
| 11 | Tb11.01.0280   | <a href="#">Tb11.01.0280</a>   | <a href="#">Tb11.01.0280</a>   | 1 | 100 | 26 | +126 | 2292 | 2264498 | hypothetical protein, conserved           |
| 11 | Tb11.01.0780   | <a href="#">Tb11.01.0780</a>   | <a href="#">Tb11.01.0780</a>   | 1 | 100 | 8  | +24  | 342  | 2425298 | hypothetical protein, conserved           |
| 11 | Tb11.01.0890   | <a href="#">Tb11.01.0890</a>   | <a href="#">Tb11.01.0890</a>   | 1 | 100 | 5  | +273 | 5187 | 2451477 | hypothetical protein, conserved           |
| 11 | Tb11.01.1080   | <a href="#">Tb11.01.1080</a>   | <a href="#">Tb11.01.1080</a>   | 1 | 100 | 8  | +69  | 2703 | 2504312 | tRNA pseudouridine synthase,              |
| 11 | Tb11.01.1120   | <a href="#">Tb11.01.1120</a>   | <a href="#">Tb11.01.1120</a>   | 1 | 100 | 21 | +72  | 1194 | 2513538 | phosphonopyruvate decarboxylase-like      |
| 11 | Tb11.01.1620   | <a href="#">Tb11.01.1620</a>   | <a href="#">Tb11.01.1620</a>   | 1 | 100 | 22 | +129 | 363  | 2608128 | hypothetical protein, conserved           |
| 11 | Tb11.01.1880   | <a href="#">Tb11.01.1880</a>   | <a href="#">Tb11.01.1880</a>   | 2 | 100 | 28 | +189 | 2409 | 2656719 | hypothetical protein, conserved           |
| 11 | Tb11.01.2580   | <a href="#">Tb11.01.2580</a>   | <a href="#">Tb11.01.2580</a>   | 1 | 100 | 2  | +135 | 2541 | 2831958 | hypothetical protein, conserved           |
| 11 | Tb11.01.2640   | <a href="#">Tb11.01.2640</a>   | <a href="#">Tb11.01.2640</a>   | 1 | 100 | 4  | +123 | 729  | 2844911 | hypothetical protein, conserved           |

|    |              |                              |                              |   |     |    |      |      |         |                                                    |
|----|--------------|------------------------------|------------------------------|---|-----|----|------|------|---------|----------------------------------------------------|
| 11 | Tb11.01.2650 | <a href="#">Tb11.01.2650</a> | <a href="#">Tb11.01.2650</a> | 1 | 100 | 31 | +117 | 1296 | 2846764 | hypothetical protein, conserved                    |
| 11 | Tb11.01.2660 | <a href="#">Tb11.01.2660</a> | <a href="#">Tb11.01.2660</a> | 1 | 100 | 3  | +36  | 1293 | 2848978 | hypothetical protein, conserved                    |
| 11 | Tb11.01.3050 | <a href="#">Tb11.01.3050</a> | <a href="#">Tb11.01.3050</a> | 1 | 100 | 15 | +141 | 1341 | 2955686 | hypothetical protein, conserved                    |
| 11 | Tb11.01.3060 | <a href="#">Tb11.01.3060</a> | <a href="#">Tb11.01.3060</a> | 2 | 100 | 13 | +303 | 1407 | 2957542 | hypothetical protein, conserved                    |
| 11 | Tb11.01.3150 | <a href="#">Tb11.01.3150</a> | <a href="#">Tb11.01.3150</a> | 1 | 100 | 3  | +51  | 2349 | 2973329 | gamma-tubulin complex subunit                      |
| 11 | Tb11.01.3660 | <a href="#">Tb11.01.3660</a> | <a href="#">Tb11.01.3660</a> | 1 | 100 | 20 | +183 | 2256 | 3098123 | DNA helicase PIF1                                  |
| 11 | Tb11.01.3860 | <a href="#">Tb11.01.3860</a> | <a href="#">Tb11.01.3860</a> | 2 | 100 | 65 | +156 | 324  | 3157934 | hypothetical protein, conserved                    |
| 11 | Tb11.01.3890 | <a href="#">Tb11.01.3890</a> | <a href="#">Tb11.01.3890</a> | 2 | 100 | 28 | +60  | 876  | 3162417 | hypothetical protein, conserved                    |
| 11 | Tb11.01.4280 | <a href="#">Tb11.01.4280</a> | <a href="#">Tb11.01.4280</a> | 2 | 100 | 73 | +39  | 1185 | 3263627 | hypothetical protein, conserved                    |
| 11 | Tb11.01.4450 | <a href="#">Tb11.01.4450</a> | <a href="#">Tb11.01.4450</a> | 1 | 100 | 13 | +162 | 1005 | 3312088 | cyclin 1,serine peptidase family S51, peptidase E, |
| 11 | Tb11.01.4530 | <a href="#">Tb11.01.4530</a> | <a href="#">Tb11.01.4530</a> | 1 | 100 | 8  | +72  | 1056 | 3330430 | hypothetical protein, conserved                    |
| 11 | Tb11.01.4950 | <a href="#">Tb11.01.4950</a> | <a href="#">Tb11.01.4950</a> | 1 | 100 | 22 | +84  | 849  | 3525361 | hypothetical protein, conserved                    |
| 11 | Tb11.01.4990 | <a href="#">Tb11.01.4990</a> | <a href="#">Tb11.01.4990</a> | 2 | 100 | 31 | +90  | 504  | 3533932 | hypothetical protein, conserved                    |
| 11 | Tb11.01.5160 | <a href="#">Tb11.01.5160</a> | <a href="#">Tb11.01.5160</a> | 1 | 100 | 14 | +171 | 1635 | 3566678 | hypothetical protein, conserved                    |
| 11 | Tb11.01.5180 | <a href="#">Tb11.01.5180</a> | <a href="#">Tb11.01.5180</a> | 2 | 100 | 23 | +285 | 750  | 3569102 | ubiquinone biosynthesis protein-like protein       |
| 11 | Tb11.01.5190 | <a href="#">Tb11.01.5190</a> | <a href="#">Tb11.01.5190</a> | 1 | 100 | 41 | +177 | 1065 | 3571842 | hypothetical protein, conserved                    |
| 11 | Tb11.01.5400 | <a href="#">Tb11.01.5400</a> | <a href="#">Tb11.01.5400</a> | 1 | 100 | 6  | +75  | 2088 | 3622015 | hypothetical protein, conserved                    |
| 11 | Tb11.01.5560 | <a href="#">Tb11.01.5560</a> | <a href="#">Tb11.01.5560</a> | 1 | 100 | 2  | +117 | 960  | 3648605 | GDP-L-fucose synthetase,                           |
| 11 | Tb11.01.5800 | <a href="#">Tb11.01.5800</a> | <a href="#">Tb11.01.5800</a> | 1 | 100 | 6  | +144 | 4371 | 3707260 | calpain-like cysteine peptidase                    |
| 11 | Tb11.01.5850 | <a href="#">Tb11.01.5850</a> | <a href="#">Tb11.01.5850</a> | 1 | 100 | 3  | +225 | 2961 | 3730467 | hypothetical protein, conserved                    |
| 11 | Tb11.01.6210 | <a href="#">Tb11.01.6210</a> | <a href="#">Tb11.01.6210</a> | 1 | 100 | 2  | +42  | 1212 | 3818943 | procyclin-associated gene 2-like protein           |
| 11 | Tb11.01.6230 | <a href="#">Tb11.01.6230</a> | <a href="#">Tb11.01.6230</a> | 1 | 100 | 8  | +90  | 1377 | 3821496 | expression site-associated gene 2                  |
| 11 | Tb11.01.6290 | <a href="#">Tb11.01.6290</a> | <a href="#">Tb11.01.6290</a> | 1 | 100 | 13 | +174 | 489  | 3839485 | hypothetical protein, conserved                    |
| 11 | Tb11.01.6310 | <a href="#">Tb11.01.6310</a> | <a href="#">Tb11.01.6310</a> | 1 | 100 | 11 | +207 | 813  | 3849673 | hypothetical protein, conserved                    |
| 11 | Tb11.01.6440 | <a href="#">Tb11.01.6440</a> | <a href="#">Tb11.01.6440</a> | 1 | 100 | 3  | +207 | 735  | 3877601 | hypothetical protein, conserved                    |
| 11 | Tb11.01.6760 | <a href="#">Tb11.01.6760</a> | <a href="#">Tb11.01.6760</a> | 1 | 100 | 11 | +66  | 1722 | 3960320 | hypothetical protein, conserved                    |
| 11 | Tb11.01.6940 | <a href="#">Tb11.01.6940</a> | <a href="#">Tb11.01.6940</a> | 1 | 100 | 3  | +24  | 801  | 3995831 | hypothetical protein, conserved                    |

|    |              |                              |                              |   |     |    |      |      |         |                                                   |
|----|--------------|------------------------------|------------------------------|---|-----|----|------|------|---------|---------------------------------------------------|
| 11 | Tb11.01.7540 | <a href="#">Tb11.01.7540</a> | <a href="#">Tb11.01.7540</a> | 1 | 100 | 4  | +246 | 2865 | 4150293 | hypothetical protein, conserved                   |
| 11 | Tb11.01.7710 | <a href="#">Tb11.01.7710</a> | <a href="#">Tb11.01.7710</a> | 1 | 100 | 31 | +63  | 1809 | 4192006 | hypothetical protein, conserved                   |
| 11 | Tb11.01.7930 | <a href="#">Tb11.01.7930</a> | <a href="#">Tb11.01.7930</a> | 1 | 100 | 23 | +126 | 1695 | 4243849 | hypothetical protein, conserved                   |
| 11 | Tb11.02.0351 | <a href="#">Tb11.02.0351</a> | <a href="#">Tb11.02.0351</a> | 2 | 100 | 51 | +120 | 1071 | 789777  | hypothetical protein, conserved                   |
| 11 | Tb11.02.0540 | <a href="#">Tb11.02.0540</a> | <a href="#">Tb11.02.0540</a> | 2 | 100 | 46 | +162 | 231  | 856145  | hypothetical protein                              |
| 11 | Tb11.02.0650 | <a href="#">Tb11.02.0650</a> | <a href="#">Tb11.02.0650</a> | 1 | 100 | 3  | +123 | 1131 | 877607  | hypothetical protein, conserved                   |
| 11 | Tb11.02.0940 | <a href="#">Tb11.02.0940</a> | <a href="#">Tb11.02.0940</a> | 1 | 100 | 43 | +120 | 2070 | 1001530 | hypothetical protein, conserved                   |
| 11 | Tb11.02.1180 | <a href="#">Tb11.02.1180</a> | <a href="#">Tb11.02.1180</a> | 1 | 100 | 36 | +90  | 1650 | 1066728 | hypothetical protein, conserved                   |
| 11 | Tb11.02.1390 | <a href="#">Tb11.02.1390</a> | <a href="#">Tb11.02.1390</a> | 1 | 100 | 6  | +234 | 2175 | 1119315 | dimethylguanosine tRNA methyltransferase          |
| 11 | Tb11.02.1400 | <a href="#">Tb11.02.1400</a> | <a href="#">Tb11.02.1400</a> | 1 | 100 | 38 | +246 | 828  | 1121828 | glycosyltransferase family-like protein           |
| 11 | Tb11.02.1610 | <a href="#">Tb11.02.1610</a> | <a href="#">Tb11.02.1610</a> | 1 | 100 | 2  | +210 | 432  | 1185881 | hypothetical protein, conserved                   |
| 11 | Tb11.02.1710 | <a href="#">Tb11.02.1710</a> | <a href="#">Tb11.02.1710</a> | 1 | 100 | 17 | +66  | 1350 | 1212458 | hypothetical protein, conserved                   |
| 11 | Tb11.02.1890 | <a href="#">Tb11.02.1890</a> | <a href="#">Tb11.02.1890</a> | 1 | 100 | 5  | +105 | 2673 | 1237079 | hypothetical protein, conserved                   |
| 11 | Tb11.02.1910 | <a href="#">Tb11.02.1910</a> | <a href="#">Tb11.02.1910</a> | 2 | 100 | 23 | +180 | 774  | 1241438 | hypothetical protein, conserved                   |
| 11 | Tb11.02.1930 | <a href="#">Tb11.02.1930</a> | <a href="#">Tb11.02.1930</a> | 1 | 100 | 8  | +135 | 6456 | 1249296 | DEAD/DEAH box RNA helicase,                       |
| 11 | Tb11.02.2050 | <a href="#">Tb11.02.2050</a> | <a href="#">Tb11.02.2050</a> | 1 | 100 | 8  | +72  | 3270 | 1269391 | threonine protein kinase                          |
| 11 | Tb11.02.2760 | <a href="#">Tb11.02.2760</a> | <a href="#">Tb11.02.2760</a> | 3 | 100 | 6  | +207 | 2694 | 1433590 | hypothetical protein, conserved                   |
| 11 | Tb11.02.3900 | <a href="#">Tb11.02.3900</a> | <a href="#">Tb11.02.3900</a> | 1 | 100 | 16 | +153 | 1155 | 1692776 | hypothetical protein, conserved                   |
| 11 | Tb11.02.4205 | <a href="#">Tb11.02.4205</a> | <a href="#">Tb11.02.4205</a> | 1 | 100 | 30 | +189 | 1203 | 1760476 | hypothetical protein, conserved                   |
| 11 | Tb11.02.4460 | <a href="#">Tb11.02.4460</a> | <a href="#">Tb11.02.4460</a> | 1 | 100 | 26 | +90  | 1095 | 1843591 | hypothetical protein, conserved                   |
| 11 | Tb11.02.4540 | <a href="#">Tb11.02.4540</a> | <a href="#">Tb11.02.4540</a> | 1 | 100 | 27 | +51  | 1146 | 1869516 | hypothetical protein, conserved                   |
| 11 | Tb11.02.5210 | <a href="#">Tb11.02.5210</a> | <a href="#">Tb11.02.5210</a> | 1 | 100 | 26 | +84  | 801  | 2040018 | RNA binding protein,                              |
| 11 | Tb11.02.5340 | <a href="#">Tb11.02.5340</a> | <a href="#">Tb11.02.5340</a> | 1 | 100 | 27 | +60  | 579  | 2068694 | hypothetical protein, conserved                   |
| 11 | Tb11.02.5440 | <a href="#">Tb11.02.5440</a> | <a href="#">Tb11.02.5440</a> | 1 | 100 | 12 | +102 | 1614 | 2093187 | hypothetical protein, conserved                   |
| 11 | Tb11.03.0060 | <a href="#">Tb11.03.0060</a> | <a href="#">Tb11.03.0060</a> | 1 | 100 | 19 | +147 | 1563 | 267369  | hypothetical protein, conserved                   |
| 11 | Tb11.03.0470 | <a href="#">Tb11.03.0470</a> | <a href="#">Tb11.03.0470</a> | 1 | 100 | 14 | +75  | 996  | 149244  | hypothetical protein, conserved                   |
| 11 | Tb11.03.0500 | <a href="#">Tb11.03.0500</a> | <a href="#">Tb11.03.0500</a> | 3 | 100 | 20 | +33  | 549  | 145098  | lipid-like atypical dual specificity phosphatase, |

|    |                |                                |                                |   |     |      |      |      |         |                                                          |
|----|----------------|--------------------------------|--------------------------------|---|-----|------|------|------|---------|----------------------------------------------------------|
| 11 | Tb11.03.0940   | <a href="#">Tb11.03.0940</a>   | <a href="#">Tb11.03.0940</a>   | 1 | 100 | 54   | +18  | 1944 | 45067   | elongation factor,                                       |
| 11 | Tb11.12.0005   | <a href="#">Tb11.12.0005</a>   | <a href="#">Tb11.12.0005</a>   | 1 | 100 | 3    | +135 | 1398 | 2346997 | hypothetical protein, conserved                          |
| 11 | Tb11.12.0006   | <a href="#">Tb11.12.0006</a>   | <a href="#">Tb11.12.0006</a>   | 1 | 100 | 2    | +273 | 1581 | 2348916 | major surface protease gp63, ,surface protease homologue |
| 11 | Tb11.12.0007   | <a href="#">Tb11.12.0007</a>   | <a href="#">Tb11.12.0007</a>   | 1 | 100 | 15   | +144 | 1959 | 2351823 | S. cerevisiae CDC 48 homolog                             |
| 11 | Tb11.12.0015   | <a href="#">Tb11.12.0015</a>   | <a href="#">Tb11.12.0015</a>   | 1 | 100 | 33   | +132 | 1338 | 2365787 | hypothetical protein, conserved                          |
| 11 | Tb11.18.0006   | <a href="#">Tb11.18.0006</a>   | <a href="#">Tb11.18.0006</a>   | 1 | 100 | 59   | +93  | 2214 | 610570  | carnitine O-acetyltransferase,                           |
| 11 | Tb11.46.0011   | <a href="#">Tb11.46.0011</a>   | <a href="#">Tb11.46.0011</a>   | 1 | 100 | 33   | +69  | 1179 | 551428  | leucine-rich repeat protein (LRRP),                      |
| 11 | Tb11.47.0005   | <a href="#">Tb11.47.0005</a>   | <a href="#">Tb11.47.0005</a>   | 1 | 100 | 51   | +147 | 507  | 417979  | hypothetical protein, conserved                          |
| 11 | Tb11.47.0019   | <a href="#">Tb11.47.0019</a>   | <a href="#">Tb11.47.0019</a>   | 2 | 100 | 26   | +381 | 1083 | 372953  | hypothetical protein, conserved                          |
| 11 | Tb11.55.0005   | <a href="#">Tb11.55.0005</a>   | <a href="#">Tb11.55.0005</a>   | 1 | 100 | 34   | +261 | 984  | 510408  | hypothetical protein, conserved                          |
| 11 | Tb11.55.0014   | <a href="#">Tb11.55.0014</a>   | <a href="#">Tb11.55.0014</a>   | 1 | 100 | 3    | +132 | 1989 | 490984  | vesicular transport protein (CDC48),                     |
| 11 | Tb11.55.0020   | <a href="#">Tb11.55.0020</a>   | <a href="#">Tb11.55.0020</a>   | 1 | 100 | 39   | +90  | 1065 | 477940  | tatD related deoxyribonuclease,                          |
| 7  | Tb927.7.230    | <a href="#">Tb927.7.230</a>    | <a href="#">Tb927.7.230</a>    | 2 | 99  | 1110 | +18  | 294  | 43411   | 40S ribosomal protein S33,                               |
| 7  | Tb927.7.240    | <a href="#">Tb927.7.240</a>    | <a href="#">Tb927.7.240</a>    | 2 | 99  | 1131 | +18  | 294  | 43937   | 40S ribosomal protein S33,                               |
| 8  | Tb927.8.2000   | <a href="#">Tb927.8.2000</a>   | <a href="#">Tb927.8.2000</a>   | 2 | 99  | 100  | +117 | 789  | 635332  | cyclophilin type peptidyl-prolyl isomerase               |
| 8  | Tb927.8.4700   | <a href="#">Tb927.8.4700</a>   | <a href="#">Tb927.8.4700</a>   | 2 | 99  | 172  | +222 | 1377 | 1381499 | amino acid transporter,                                  |
| 9  | Tb09.160.4450  | <a href="#">Tb09.160.4450</a>  | <a href="#">Tb09.160.4450</a>  | 4 | 99  | 1021 | +156 | 645  | 957413  | 40S ribosomal protein S3,                                |
| 9  | Tb09.244.2720  | <a href="#">Tb09.244.2720</a>  | <a href="#">Tb09.244.2720</a>  | 3 | 99  | 736  | +51  | 615  | 2308692 | ribosomal protein L15,                                   |
| 10 | Tb10.6k15.1480 | <a href="#">Tb10.6k15.1480</a> | <a href="#">Tb10.6k15.1480</a> | 2 | 99  | 192  | +180 | 381  | 2184558 | kinetoplast DNA-associated protein                       |
| 10 | Tb10.6k15.3250 | <a href="#">Tb10.6k15.3250</a> | <a href="#">Tb10.6k15.3250</a> | 2 | 99  | 235  | +261 | 1260 | 1850142 | succinyl-CoA ligase [GDP-forming] beta                   |
| 10 | Tb10.70.3160   | <a href="#">Tb10.70.3160</a>   | <a href="#">Tb10.70.3160</a>   | 7 | 99  | 1986 | +27  | 318  | 1082221 | 60S ribosomal protein L30                                |
| 11 | Tb11.01.2680   | <a href="#">Tb11.01.2680</a>   | <a href="#">Tb11.01.2680</a>   | 2 | 99  | 1294 | +99  | 735  | 2853626 | 40S ribosomal protein SA,                                |
| 11 | Tb11.01.5280   | <a href="#">Tb11.01.5280</a>   | <a href="#">Tb11.01.5280</a>   | 2 | 99  | 173  | +81  | 558  | 3591959 | hypothetical protein, conserved                          |
| 11 | Tb11.02.2730   | <a href="#">Tb11.02.2730</a>   | <a href="#">Tb11.02.2730</a>   | 2 | 99  | 73   | +360 | 243  | 1427806 | hypothetical protein, conserved                          |
| 2  | Tb927.2.1560   | <a href="#">Tb927.2.1560</a>   | <a href="#">Tb927.2.1560</a>   | 3 | 98  | 294  | +234 | 591  | 305260  | cyclophilin type peptidyl-prolyl isomerase               |
| 3  | Tb927.3.3310   | <a href="#">Tb927.3.3310</a>   | <a href="#">Tb927.3.3310</a>   | 4 | 98  | 990  | +33  | 657  | 851554  | 60S ribosomal protein L13,                               |
| 3  | Tb927.3.5130   | <a href="#">Tb927.3.5130</a>   | <a href="#">Tb927.3.5130</a>   | 3 | 98  | 40   | +222 | 1137 | 1438364 | hypothetical protein, conserved                          |

|    |               |                               |                               |   |    |      |      |      |         |                                         |
|----|---------------|-------------------------------|-------------------------------|---|----|------|------|------|---------|-----------------------------------------|
| 4  | Tb927.4.1420  | <a href="#">Tb927.4.1420</a>  | <a href="#">Tb927.4.1420</a>  | 2 | 98 | 53   | +300 | 405  | 368344  | hypothetical protein, conserved         |
| 6  | Tb927.6.2000  | <a href="#">Tb927.6.2000</a>  | <a href="#">Tb927.6.2000</a>  | 3 | 98 | 43   | +63  | 1371 | 653078  | spliceosome-associated protein,         |
| 6  | Tb927.6.4620  | <a href="#">Tb927.6.4620</a>  | <a href="#">Tb927.6.4620</a>  | 3 | 98 | 54   | +144 | 468  | 1292504 | hypothetical protein, conserved         |
| 6  | Tb927.6.660   | <a href="#">Tb927.6.660</a>   | <a href="#">Tb927.6.660</a>   | 2 | 98 | 41   | +258 | 1812 | 281044  | hypothetical protein, conserved         |
| 7  | Tb927.7.1740  | <a href="#">Tb927.7.1740</a>  | <a href="#">Tb927.7.1740</a>  | 5 | 98 | 792  | +45  | 729  | 430058  | 60S ribosomal protein L7,               |
| 7  | Tb927.7.1750  | <a href="#">Tb927.7.1750</a>  | <a href="#">Tb927.7.1750</a>  | 5 | 98 | 703  | +45  | 729  | 431071  | 60S ribosomal protein L7,               |
| 7  | Tb927.7.7380  | <a href="#">Tb927.7.7380</a>  | <a href="#">Tb927.7.7380</a>  | 2 | 98 | 47   | +30  | 246  | 2123051 | U6 snRNA-associated Sm-like protein     |
| 7  | Tb927.7.930   | <a href="#">Tb927.7.930</a>   | <a href="#">Tb927.7.930</a>   | 3 | 98 | 58   | +159 | 1233 | 235926  | hypothetical protein, conserved, zinc   |
| 10 | Tb10.70.1640  | <a href="#">Tb10.70.1640</a>  | <a href="#">Tb10.70.1640</a>  | 2 | 98 | 42   | +120 | 1725 | 1359094 | hypothetical protein, conserved         |
| 11 | Tb11.01.1990  | <a href="#">Tb11.01.1990</a>  | <a href="#">Tb11.01.1990</a>  | 2 | 98 | 58   | +90  | 1086 | 2681686 | hypothetical protein, conserved         |
| 11 | Tb11.02.0530  | <a href="#">Tb11.02.0530</a>  | <a href="#">Tb11.02.0530</a>  | 2 | 98 | 134  | +255 | 1071 | 854842  | phosphoribosylpyrophosphate synthetase, |
| 11 | Tb11.02.3770  | <a href="#">Tb11.02.3770</a>  | <a href="#">Tb11.02.3770</a>  | 4 | 98 | 338  | +105 | 324  | 1668423 | hypothetical protein, conserved         |
| 2  | Tb927.2.5160  | <a href="#">Tb927.2.5160</a>  | <a href="#">Tb927.2.5160</a>  | 4 | 97 | 265  | +12  | 1203 | 910854  | chaperone protein DnaJ,                 |
| 4  | Tb927.4.2310  | <a href="#">Tb927.4.2310</a>  | <a href="#">Tb927.4.2310</a>  | 3 | 97 | 69   | +237 | 2004 | 601242  | asparaginyl-tRNA synthetase,            |
| 4  | Tb927.4.3570  | <a href="#">Tb927.4.3570</a>  | <a href="#">Tb927.4.3570</a>  | 3 | 97 | 770  | +105 | 681  | 915785  | translation elongation factor 1-beta,   |
| 4  | Tb927.4.3590  | <a href="#">Tb927.4.3590</a>  | <a href="#">Tb927.4.3590</a>  | 3 | 97 | 839  | +105 | 681  | 917842  | translation elongation factor 1-beta    |
| 7  | Tb927.7.2370  | <a href="#">Tb927.7.2370</a>  | <a href="#">Tb927.7.2370</a>  | 2 | 97 | 682  | +60  | 459  | 611752  | 40S ribosomal protein S15,              |
| 8  | Tb927.8.1610  | <a href="#">Tb927.8.1610</a>  | <a href="#">Tb927.8.1610</a>  | 2 | 97 | 263  | +81  | 1665 | 537142  | major surface protease gp63             |
| 8  | Tb927.8.1630  | <a href="#">Tb927.8.1630</a>  | <a href="#">Tb927.8.1630</a>  | 2 | 97 | 293  | +99  | 1665 | 541528  | major surface protease gp63             |
| 8  | Tb927.8.1640  | <a href="#">Tb927.8.1640</a>  | <a href="#">Tb927.8.1640</a>  | 2 | 97 | 259  | +99  | 1665 | 543721  | major surface protease gp63             |
| 8  | Tb927.8.7700  | <a href="#">Tb927.8.7700</a>  | <a href="#">Tb927.8.7700</a>  | 3 | 97 | 132  | +177 | 1464 | 2216565 | amino acid transporter,                 |
| 9  | Tb09.160.3820 | <a href="#">Tb09.160.3820</a> | <a href="#">Tb09.160.3820</a> | 2 | 97 | 59   | +222 | 1284 | 878846  | nucleolar RNA binding protein,          |
| 9  | Tb09.211.1670 | <a href="#">Tb09.211.1670</a> | <a href="#">Tb09.211.1670</a> | 2 | 97 | 33   | +99  | 2022 | 1556615 | hypothetical protein, conserved         |
| 10 | Tb10.70.1690  | <a href="#">Tb10.70.1690</a>  | <a href="#">Tb10.70.1690</a>  | 5 | 97 | 1095 | +141 | 519  | 1347452 | 40S ribosomal protein S10,              |
| 11 | Tb11.01.4750  | <a href="#">Tb11.01.4750</a>  | <a href="#">Tb11.01.4750</a>  | 4 | 97 | 690  | +384 | 1215 | 3479979 | elongation factor 1 gamma,              |
| 11 | Tb11.01.5300  | <a href="#">Tb11.01.5300</a>  | <a href="#">Tb11.01.5300</a>  | 2 | 97 | 118  | +66  | 1272 | 3596349 | ornithine decarboxylase                 |
| 11 | Tb11.03.0475  | <a href="#">Tb11.03.0475</a>  | <a href="#">Tb11.03.0475</a>  | 3 | 97 | 254  | +42  | 279  | 147240  | hypothetical protein, conserved         |
| 4  | Tb927.4.3550  | <a href="#">Tb927.4.3550</a>  | <a href="#">Tb927.4.3550</a>  | 6 | 96 | 711  | +360 | 669  | 912419  | 60S ribosomal protein L13a,             |

|    |               |                               |                               |   |    |     |      |      |         |                                                    |
|----|---------------|-------------------------------|-------------------------------|---|----|-----|------|------|---------|----------------------------------------------------|
| 6  | Tb927.6.1070  | <a href="#">Tb927.6.1070</a>  | <a href="#">Tb927.6.1070</a>  | 2 | 96 | 23  | +204 | 2592 | 427443  | hypothetical protein, conserved                    |
| 7  | Tb927.7.5180  | <a href="#">Tb927.7.5180</a>  | <a href="#">Tb927.7.5180</a>  | 4 | 96 | 318 | +168 | 495  | 1364071 | 60S ribosomal protein L23a,                        |
| 8  | Tb927.8.1620  | <a href="#">Tb927.8.1620</a>  | <a href="#">Tb927.8.1620</a>  | 2 | 96 | 250 | +99  | 1665 | 539335  | major surface protease gp63                        |
| 8  | Tb927.8.1930  | <a href="#">Tb927.8.1930</a>  | <a href="#">Tb927.8.1930</a>  | 2 | 96 | 23  | +45  | 786  | 621931  | hypothetical protein, conserved                    |
| 9  | Tb09.160.0400 | <a href="#">Tb09.160.0400</a> | <a href="#">Tb09.160.0400</a> | 2 | 96 | 27  | +135 | 1842 | 339615  | hypothetical protein, conserved                    |
| 9  | Tb09.160.3060 | <a href="#">Tb09.160.3060</a> | <a href="#">Tb09.160.3060</a> | 2 | 96 | 25  | +195 | 1971 | 779001  | hypothetical protein                               |
| 9  | Tb09.211.0530 | <a href="#">Tb09.211.0530</a> | <a href="#">Tb09.211.0530</a> | 3 | 96 | 46  | +288 | 510  | 1353390 | hypothetical protein, conserved                    |
| 10 | Tb10.406.0290 | <a href="#">Tb10.406.0290</a> | <a href="#">Tb10.406.0290</a> | 2 | 96 | 92  | +111 | 690  | 2543623 | protein tyrosine phosphatase,                      |
| 11 | Tb11.02.0580  | <a href="#">Tb11.02.0580</a>  | <a href="#">Tb11.02.0580</a>  | 2 | 96 | 70  | +132 | 615  | 862920  | vesicular protein trafficking mediator             |
| 11 | Tb11.03.0700  | <a href="#">Tb11.03.0700</a>  | <a href="#">Tb11.03.0700</a>  | 2 | 96 | 109 | +207 | 882  | 98820   | hypothetical protein, conserved                    |
| 1  | Tb927.1.3950  | <a href="#">Tb927.1.3950</a>  | <a href="#">Tb927.1.3950</a>  | 2 | 95 | 43  | +195 | 1515 | 840877  | alanine aminotransferase,                          |
| 2  | Tb927.2.4460  | <a href="#">Tb927.2.4460</a>  | <a href="#">Tb927.2.4460</a>  | 3 | 95 | 18  | +180 | 1791 | 790729  | hypothetical protein, conserved                    |
| 3  | Tb927.3.3370  | <a href="#">Tb927.3.3370</a>  | <a href="#">Tb927.3.3370</a>  | 3 | 95 | 41  | +177 | 1173 | 863609  | hypothetical protein, conserved                    |
| 4  | Tb927.4.4820  | <a href="#">Tb927.4.4820</a>  | <a href="#">Tb927.4.4820</a>  | 3 | 95 | 61  | +51  | 1422 | 1320642 | amino acid transporter 10,                         |
| 4  | Tb927.4.4840  | <a href="#">Tb927.4.4840</a>  | <a href="#">Tb927.4.4840</a>  | 3 | 95 | 62  | +51  | 1422 | 1324631 | amino acid transporter 7,                          |
| 4  | Tb927.4.4890  | <a href="#">Tb927.4.4890</a>  | <a href="#">Tb927.4.4890</a>  | 3 | 95 | 20  | +72  | 1584 | 1339222 | hypothetical protein, conserved                    |
| 5  | Tb927.5.2640  | <a href="#">Tb927.5.2640</a>  | <a href="#">Tb927.5.2640</a>  | 4 | 95 | 21  | +231 | 834  | 845231  | hypothetical protein, conserved                    |
| 6  | Tb927.6.4630  | <a href="#">Tb927.6.4630</a>  | <a href="#">Tb927.6.4630</a>  | 5 | 95 | 35  | +234 | 1101 | 1293226 | kinetoplastid-specific phospho-protein phosphatase |
| 8  | Tb927.8.6520  | <a href="#">Tb927.8.6520</a>  | <a href="#">Tb927.8.6520</a>  | 2 | 95 | 19  | +60  | 1245 | 1884528 | hypothetical protein, conserved                    |
| 10 | Tb10.389.0150 | <a href="#">Tb10.389.0150</a> | <a href="#">Tb10.389.0150</a> | 3 | 95 | 17  | +135 | 7821 | 3174532 | hypothetical protein, conserved                    |
| 11 | Tb11.01.2700  | <a href="#">Tb11.01.2700</a>  | <a href="#">Tb11.01.2700</a>  | 2 | 95 | 19  | +249 | 852  | 2859744 | hypothetical protein, conserved                    |
| 11 | Tb11.01.8620  | <a href="#">Tb11.01.8620</a>  | <a href="#">Tb11.01.8620</a>  | 3 | 95 | 37  | +330 | 1449 | 4434141 | hypothetical protein, conserved                    |
| 1  | Tb927.1.1990  | <a href="#">Tb927.1.1990</a>  | <a href="#">Tb927.1.1990</a>  | 2 | 94 | 16  | +81  | 597  | 517835  | hypothetical protein, conserved                    |
| 1  | Tb927.1.3280  | <a href="#">Tb927.1.3280</a>  | <a href="#">Tb927.1.3280</a>  | 2 | 94 | 18  | +102 | 756  | 712980  | septum formation protein MAF homologue,            |
| 3  | Tb927.3.2010  | <a href="#">Tb927.3.2010</a>  | <a href="#">Tb927.3.2010</a>  | 2 | 94 | 16  | +84  | 1665 | 524249  | hypothetical protein, conserved                    |
| 4  | Tb927.4.930   | <a href="#">Tb927.4.930</a>   | <a href="#">Tb927.4.930</a>   | 3 | 94 | 35  | +84  | 570  | 260957  | 50S ribosomal protein L14,                         |
| 5  | Tb927.5.2260  | <a href="#">Tb927.5.2260</a>  | <a href="#">Tb927.5.2260</a>  | 3 | 94 | 642 | +54  | 351  | 704880  | hypothetical protein, conserved                    |

|    |                      |                                      |                                      |          |           |           |            |             |               |                                              |
|----|----------------------|--------------------------------------|--------------------------------------|----------|-----------|-----------|------------|-------------|---------------|----------------------------------------------|
| 8  | Tb927.8.7680         | <a href="#">Tb927.8.7680</a>         | <a href="#">Tb927.8.7680</a>         | 3        | 94        | 137       | +177       | 1464        | 2212523       | amino acid transporter,                      |
| 10 | Tb10.70.6320         | <a href="#">Tb10.70.6320</a>         | <a href="#">Tb10.70.6320</a>         | 2        | 94        | 17        | +57        | 1074        | 435699        | hypothetical protein, conserved              |
| 11 | Tb11.01.3530         | <a href="#">Tb11.01.3530</a>         | <a href="#">Tb11.01.3530</a>         | 2        | 94        | 18        | +165       | 1089        | 3065417       | hypothetical protein, conserved              |
| 11 | Tb11.01.3700         | <a href="#">Tb11.01.3700</a>         | <a href="#">Tb11.01.3700</a>         | 4        | 94        | 38        | +54        | 2094        | 3111754       | leucine-rich repeat protein (LRRP),          |
| 11 | Tb11.03.0840         | <a href="#">Tb11.03.0840</a>         | <a href="#">Tb11.03.0840</a>         | 2        | 94        | 31        | +66        | 555         | 68409         | hypothetical protein, conserved              |
| 4  | Tb927.4.3820         | <a href="#">Tb927.4.3820</a>         | <a href="#">Tb927.4.3820</a>         | 3        | 93        | 14        | +69        | 1281        | 1000983       | hypothetical protein, conserved              |
| 5  | Tb927.5.2160         | <a href="#">Tb927.5.2160</a>         | <a href="#">Tb927.5.2160</a>         | 4        | 93        | 605       | +54        | 351         | 690857        | hypothetical protein, conserved              |
| 5  | Tb927.5.2170         | <a href="#">Tb927.5.2170</a>         | <a href="#">Tb927.5.2170</a>         | 5        | 93        | 630       | +54        | 351         | 692334        | hypothetical protein, conserved              |
| 5  | Tb927.5.2230         | <a href="#">Tb927.5.2230</a>         | <a href="#">Tb927.5.2230</a>         | 3        | 93        | 616       | +54        | 351         | 700698        | hypothetical protein, conserved              |
| 6  | Tb927.6.4780         | <a href="#">Tb927.6.4780</a>         | <a href="#">Tb927.6.4780</a>         | 2        | 93        | 45        | +141       | 2100        | 1334045       | DNA ligase I,                                |
| 9  | <b>Tb09.160.1780</b> | <b><a href="#">Tb09.160.1780</a></b> | <b><a href="#">Tb09.160.1780</a></b> | <b>2</b> | <b>93</b> | <b>27</b> | <b>+30</b> | <b>3042</b> | <b>630408</b> | <b>protein kinase,</b>                       |
| 10 | Tb10.6k15.2770       | <a href="#">Tb10.6k15.2770</a>       | <a href="#">Tb10.6k15.2770</a>       | 3        | 93        | 14        | +177       | 1164        | 1935472       | COP9 signalosome subunit                     |
| 10 | Tb10.70.1550         | <a href="#">Tb10.70.1550</a>         | <a href="#">Tb10.70.1550</a>         | 2        | 93        | 29        | +24        | 1413        | 1374453       | hypothetical protein, conserved              |
| 11 | Tb11.01.0710         | <a href="#">Tb11.01.0710</a>         | <a href="#">Tb11.01.0710</a>         | 3        | 93        | 14        | +21        | 2454        | 2409775       | elongation factor G2-like protein            |
| 3  | Tb927.3.3530         | <a href="#">Tb927.3.3530</a>         | <a href="#">Tb927.3.3530</a>         | 2        | 92        | 12        | +210       | 1143        | 993469        | hypothetical protein, conserved              |
| 5  | Tb927.5.2200         | <a href="#">Tb927.5.2200</a>         | <a href="#">Tb927.5.2200</a>         | 3        | 92        | 559       | +54        | 351         | 696516        | hypothetical protein, conserved              |
| 8  | Tb927.8.1370         | <a href="#">Tb927.8.1370</a>         | <a href="#">Tb927.8.1370</a>         | 2        | 92        | 13        | +45        | 462         | 445512        | hypothetical protein, conserved              |
| 9  | Tb09.160.1030        | <a href="#">Tb09.160.1030</a>        | <a href="#">Tb09.160.1030</a>        | 2        | 92        | 75        | +81        | 300         | 499249        | hypothetical protein, conserved              |
| 9  | Tb09.211.2080        | <a href="#">Tb09.211.2080</a>        | <a href="#">Tb09.211.2080</a>        | 2        | 92        | 13        | +36        | 1794        | 1639853       | hypothetical protein, conserved              |
| 10 | Tb10.389.0630        | <a href="#">Tb10.389.0630</a>        | <a href="#">Tb10.389.0630</a>        | 4        | 92        | 179       | +279       | 2148        | 3062948       | bifunctional aminoacyl-tRNA synthetase       |
| 10 | Tb10.70.0930         | <a href="#">Tb10.70.0930</a>         | <a href="#">Tb10.70.0930</a>         | 2        | 92        | 13        | +48        | 1701        | 1497177       | hypothetical protein, conserved zinc fi nger |
| 10 | Tb10.70.2400         | <a href="#">Tb10.70.2400</a>         | <a href="#">Tb10.70.2400</a>         | 2        | 92        | 12        | +171       | 1746        | 1205830       | hypothetical protein, conserved              |
| 11 | Tb11.01.3340         | <a href="#">Tb11.01.3340</a>         | <a href="#">Tb11.01.3340</a>         | 3        | 92        | 26        | +141       | 2103        | 3021928       | phosphoglycerate mutase-like protein         |
| 10 | Tb10.6k15.3700       | <a href="#">Tb10.6k15.3700</a>       | <a href="#">Tb10.6k15.3700</a>       | 2        | 91        | 11        | +33        | 1380        | 1751040       | hypothetical protein, conserved              |
| 10 | Tb10.70.2620         | <a href="#">Tb10.70.2620</a>         | <a href="#">Tb10.70.2620</a>         | 2        | 91        | 11        | +27        | 1374        | 1173547       | hypothetical protein, SET domain             |
| 11 | Tb11.01.0170         | <a href="#">Tb11.01.0170</a>         | <a href="#">Tb11.01.0170</a>         | 2        | 91        | 43        | +18        | 1890        | 2290595       | NADPH--cytochrome P450 reductase             |
| 11 | Tb11.v4.0008         | <a href="#">Tb11.v4.0008</a>         | <a href="#">Tb11.v4.0008</a>         | 2        | 91        | 11        | +207       | 1866        | 4003354       | hypothetical protein                         |
| 2  | Tb927.2.4150         | <a href="#">Tb927.2.4150</a>         | <a href="#">Tb927.2.4150</a>         | 5        | 90        | 29        | +147       | 960         | 730121        | hypothetical protein, conserved              |



|    |                      |                                      |                                      |          |           |           |             |             |                |                                        |
|----|----------------------|--------------------------------------|--------------------------------------|----------|-----------|-----------|-------------|-------------|----------------|----------------------------------------|
| 2  | Tb927.2.4390         | <a href="#">Tb927.2.4390</a>         | <a href="#">Tb927.2.4390</a>         | 2        | 90        | 10        | +33         | 2259        | 777424         | endo/exonuclease Mre11                 |
| 3  | Tb927.3.1710         | <a href="#">Tb927.3.1710</a>         | <a href="#">Tb927.3.1710</a>         | 2        | 90        | 20        | +102        | 1137        | 449751         | hypothetical protein, conserved        |
| 6  | Tb927.6.2980         | <a href="#">Tb927.6.2980</a>         | <a href="#">Tb927.6.2980</a>         | 2        | 90        | 10        | +39         | 3078        | 887744         | protein kinase,                        |
| 8  | Tb927.8.7540         | <a href="#">Tb927.8.7540</a>         | <a href="#">Tb927.8.7540</a>         | 2        | 90        | 10        | +138        | 3330        | 2169925        | hypothetical protein                   |
| 6  | Tb927.6.4590         | <a href="#">Tb927.6.4590</a>         | <a href="#">Tb927.6.4590</a>         | 3        | 89        | 44        | +78         | 1746        | 1285659        | glutamyl-tRNA synthetase,              |
| 11 | <b>Tb11.03.0370</b>  | <b><a href="#">Tb11.03.0370</a></b>  | <b><a href="#">Tb11.03.0370</a></b>  | <b>2</b> | <b>89</b> | <b>18</b> | <b>+300</b> | <b>738</b>  | <b>192839</b>  | <b>hypothetical protein, conserved</b> |
| 11 | Tb11.03.0540         | <a href="#">Tb11.03.0540</a>         | <a href="#">Tb11.03.0540</a>         | 2        | 89        | 18        | +78         | 1998        | 137442         | ABC transporter,                       |
| 1  | Tb927.1.1720         | <a href="#">Tb927.1.1720</a>         | <a href="#">Tb927.1.1720</a>         | 5        | 88        | 33        | +66         | 1227        | 436940         | hypothetical protein, conserved        |
| 2  | Tb927.2.5440         | <a href="#">Tb927.2.5440</a>         | <a href="#">Tb927.2.5440</a>         | 4        | 87        | 24        | +246        | 2643        | 971330         | hypothetical protein, conserved        |
| 5  | Tb927.5.940          | <a href="#">Tb927.5.940</a>          | <a href="#">Tb927.5.940</a>          | 4        | 86        | 15        | +198        | 2436        | 314335         | NADH-dependent fumarate reductase      |
| 7  | Tb927.7.3890         | <a href="#">Tb927.7.3890</a>         | <a href="#">Tb927.7.3890</a>         | 3        | 86        | 7         | +78         | 843         | 1019389        | hypothetical protein, conserved        |
| 7  | Tb927.7.4590         | <a href="#">Tb927.7.4590</a>         | <a href="#">Tb927.7.4590</a>         | 2        | 86        | 7         | +111        | 1530        | 1220705        | chaperone protein DNAJ,                |
| 8  | Tb927.8.3020         | <a href="#">Tb927.8.3020</a>         | <a href="#">Tb927.8.3020</a>         | 2        | 86        | 14        | +225        | 1812        | 907278         | hypothetical protein, conserved        |
| 8  | Tb927.8.3330         | <a href="#">Tb927.8.3330</a>         | <a href="#">Tb927.8.3330</a>         | 2        | 86        | 7         | +99         | 924         | 999073         | mitochondrial carrier protein,         |
| 10 | Tb10.6k15.3720       | <a href="#">Tb10.6k15.3720</a>       | <a href="#">Tb10.6k15.3720</a>       | 3        | 86        | 35        | +24         | 1284        | 1747266        | acid phosphatase,                      |
| 7  | Tb927.7.4670         | <a href="#">Tb927.7.4670</a>         | <a href="#">Tb927.7.4670</a>         | 2        | 85        | 71        | +69         | 906         | 1238373        | exosome complex exonuclease            |
| 10 | Tb10.61.0480         | <a href="#">Tb10.61.0480</a>         | <a href="#">Tb10.61.0480</a>         | 3        | 85        | 14        | +30         | 795         | 3834968        | hypothetical protein, conserved        |
| 6  | Tb927.6.4160         | <a href="#">Tb927.6.4160</a>         | <a href="#">Tb927.6.4160</a>         | 4        | 84        | 62        | +225        | 1089        | 1198438        | hypothetical protein, conserved        |
| 8  | Tb927.8.3900         | <a href="#">Tb927.8.3900</a>         | <a href="#">Tb927.8.3900</a>         | 3        | 84        | 58        | +186        | 927         | 1163808        | hypothetical protein, conserved        |
| 11 | Tb11.01.6700         | <a href="#">Tb11.01.6700</a>         | <a href="#">Tb11.01.6700</a>         | 5        | 84        | 88        | +18         | 381         | 3945507        | hypothetical protein, conserved        |
| 6  | Tb927.6.2490         | <a href="#">Tb927.6.2490</a>         | <a href="#">Tb927.6.2490</a>         | 3        | 83        | 6         | +153        | 723         | 759002         | hypothetical protein, conserved        |
| 10 | Tb10.70.5630         | <a href="#">Tb10.70.5630</a>         | <a href="#">Tb10.70.5630</a>         | 2        | 83        | 6         | +204        | 2526        | 551388         | hypothetical protein, conserved        |
| 8  | Tb927.8.2390         | <a href="#">Tb927.8.2390</a>         | <a href="#">Tb927.8.2390</a>         | 2        | 82        | 11        | +198        | 4398        | 717543         | hypothetical protein, conserved        |
| 9  | <b>Tb09.211.2460</b> | <b><a href="#">Tb09.211.2460</a></b> | <b><a href="#">Tb09.211.2460</a></b> | <b>2</b> | <b>82</b> | <b>11</b> | <b>+222</b> | <b>2424</b> | <b>1717653</b> | <b>hypothetical protein, conserved</b> |
| 1  | Tb927.1.290          | <a href="#">Tb927.1.290</a>          | <a href="#">Tb927.1.290</a>          | 2        | 80        | 10        | +165        | 4182        | 113137         | leucine-rich repeat protein (LRRP),    |
| 2  | Tb927.2.2410         | <a href="#">Tb927.2.2410</a>         | <a href="#">Tb927.2.2410</a>         | 2        | 80        | 5         | +192        | 1944        | 475894         | hypothetical protein, conserved        |
| 3  | Tb927.3.1070         | <a href="#">Tb927.3.1070</a>         | <a href="#">Tb927.3.1070</a>         | 2        | 80        | 15        | +45         | 1335        | 263824         | peptide chain release factor 1,        |
| 3  | Tb927.3.1460         | <a href="#">Tb927.3.1460</a>         | <a href="#">Tb927.3.1460</a>         | 6        | 80        | 45        | +126        | 375         | 372975         | hypothetical protein                   |

|    |                |                                |                                |   |    |     |       |      |         |                                                          |
|----|----------------|--------------------------------|--------------------------------|---|----|-----|-------|------|---------|----------------------------------------------------------|
| 9  | Tb09.160.4290  | <a href="#">Tb09.160.4290</a>  | <a href="#">Tb09.160.4290</a>  | 3 | 78 | 18  | +276  | 1377 | 940660  | hypothetical protein, conserved                          |
| 9  | Tb09.211.1030  | <a href="#">Tb09.211.1030</a>  | <a href="#">Tb09.211.1030</a>  | 3 | 78 | 111 | +54   | 1014 | 1454758 | phosphatidylcholine:ceramide cholinephosphotransferase 2 |
| 10 | Tb10.05.0090   | <a href="#">Tb10.05.0090</a>   | <a href="#">Tb10.05.0090</a>   | 4 | 78 | 50  | +210  | 1371 | 3263167 | hypothetical protein, conserved                          |
| 5  | Tb927.5.1990   | <a href="#">Tb927.5.1990</a>   | <a href="#">Tb927.5.1990</a>   | 2 | 75 | 12  | +210  | 795  | 616011  | hypothetical protein, conserved                          |
| 8  | Tb927.8.7600   | <a href="#">Tb927.8.7600</a>   | <a href="#">Tb927.8.7600</a>   | 4 | 75 | 165 | +216  | 1404 | 2194319 | amino acid transporter,                                  |
| 11 | Tb11.01.0210   | <a href="#">Tb11.01.0210</a>   | <a href="#">Tb11.01.0210</a>   | 2 | 75 | 4   | +54   | 444  | 2283676 | hypothetical protein                                     |
| 11 | Tb11.01.3760   | <a href="#">Tb11.01.3760</a>   | <a href="#">Tb11.01.3760</a>   | 3 | 73 | 41  | +129  | 423  | 3128917 | hypothetical protein, conserved                          |
| 8  | Tb927.8.2690   | <a href="#">Tb927.8.2690</a>   | <a href="#">Tb927.8.2690</a>   | 3 | 71 | 14  | +90   | 1110 | 800889  | hypothetical protein, conserved                          |
| 10 | Tb10.6k15.3370 | <a href="#">Tb10.6k15.3370</a> | <a href="#">Tb10.6k15.3370</a> | 2 | 71 | 7   | +186  | 2484 | 1827592 | terminal uridylyltransferase 3,                          |
| 4  | Tb927.4.4010   | <a href="#">Tb927.4.4010</a>   | <a href="#">Tb927.4.4010</a>   | 4 | 70 | 46  | +84   | 1371 | 1067782 | amino acid transporter,                                  |
| 11 | Tb11.52.0004   | <a href="#">Tb11.52.0004</a>   | <a href="#">Tb11.52.0004</a>   | 4 | 70 | 23  | +201  | 708  | 3384321 | hypothetical protein, conserved                          |
| 11 | Tb11.02.2250   | <a href="#">Tb11.02.2250</a>   | <a href="#">Tb11.02.2250</a>   | 4 | 69 | 16  | +3789 | 780  | 1319085 | hypothetical protein, conserved                          |
| 4  | Tb927.4.4000   | <a href="#">Tb927.4.4000</a>   | <a href="#">Tb927.4.4000</a>   | 4 | 68 | 47  | +84   | 1371 | 1064468 | amino acid transporter,                                  |
| 9  | Tb09.211.1000  | <a href="#">Tb09.211.1000</a>  | <a href="#">Tb09.211.1000</a>  | 6 | 68 | 110 | +54   | 1044 | 1447601 | phosphatidylcholine:ceramide cholinephosphotransferase 2 |
| 10 | Tb10.6k15.3100 | <a href="#">Tb10.6k15.3100</a> | <a href="#">Tb10.6k15.3100</a> | 3 | 68 | 22  | +48   | 1623 | 1880531 | hypothetical protein, conserved                          |
| 7  | Tb927.7.6410   | <a href="#">Tb927.7.6410</a>   | <a href="#">Tb927.7.6410</a>   | 2 | 67 | 3   | +2451 | 1920 | 1739255 | hypothetical protein, conserved                          |
| 10 | Tb10.406.0140  | <a href="#">Tb10.406.0140</a>  | <a href="#">Tb10.406.0140</a>  | 2 | 67 | 3   | +231  | 1704 | 2568891 | hypothetical protein, conserved                          |
| 11 | Tb11.02.0280   | <a href="#">Tb11.02.0280</a>   | <a href="#">Tb11.02.0280</a>   | 2 | 67 | 3   | +420  | 2097 | 767487  | hypothetical protein, conserved                          |
| 11 | Tb11.02.2550   | <a href="#">Tb11.02.2550</a>   | <a href="#">Tb11.02.2550</a>   | 2 | 67 | 3   | +60   | 1572 | 1383708 | AAA ATPase,                                              |
| 11 | Tb11.02.1020   | <a href="#">Tb11.02.1020</a>   | <a href="#">Tb11.02.1020</a>   | 4 | 65 | 31  | +135  | 543  | 1024046 | hypothetical protein, conserved                          |
| 4  | Tb927.4.3990   | <a href="#">Tb927.4.3990</a>   | <a href="#">Tb927.4.3990</a>   | 4 | 63 | 40  | +84   | 1371 | 1061159 | amino acid transporter,                                  |
| 6  | Tb927.6.2180   | <a href="#">Tb927.6.2180</a>   | <a href="#">Tb927.6.2180</a>   | 4 | 63 | 76  | +222  | 519  | 695798  | hypothetical protein, conserved                          |
| 9  | Tb09.244.2830  | <a href="#">Tb09.244.2830</a>  | <a href="#">Tb09.244.2830</a>  | 5 | 63 | 24  | +156  | 885  | 2292299 | hypothetical protein, conserved                          |
| 10 | Tb10.70.6030   | <a href="#">Tb10.70.6030</a>   | <a href="#">Tb10.70.6030</a>   | 2 | 63 | 19  | +108  | 795  | 476970  | hypothetical protein, conserved                          |
| 8  | Tb927.8.1700   | <a href="#">Tb927.8.1700</a>   | <a href="#">Tb927.8.1700</a>   | 3 | 62 | 13  | +246  | 2010 | 566789  | hypothetical protein, conserved                          |
| 11 | Tb11.03.0300   | <a href="#">Tb11.03.0300</a>   | <a href="#">Tb11.03.0300</a>   | 6 | 62 | 58  | +126  | 2280 | 214244  | hypothetical protein, conserved                          |
| 8  | Tb927.8.3880   | <a href="#">Tb927.8.3880</a>   | <a href="#">Tb927.8.3880</a>   | 5 | 61 | 83  | +186  | 726  | 1158421 | hypothetical protein, conserved                          |

|    |                |                                |                                |   |    |     |       |      |         |                                          |
|----|----------------|--------------------------------|--------------------------------|---|----|-----|-------|------|---------|------------------------------------------|
| 1  | Tb927.1.480    | <a href="#">Tb927.1.480</a>    | <a href="#">Tb927.1.480</a>    | 2 | 60 | 10  | +165  | 4185 | 181845  | leucine-rich repeat protein (LRRP)       |
| 4  | Tb927.4.910    | <a href="#">Tb927.4.910</a>    | <a href="#">Tb927.4.910</a>    | 3 | 60 | 10  | +141  | 777  | 258442  | hypothetical protein, conserved          |
| 11 | Tb11.01.8600   | <a href="#">Tb11.01.8600</a>   | <a href="#">Tb11.01.8600</a>   | 2 | 60 | 5   | +30   | 2733 | 4428642 | hypothetical protein, conserved          |
| 8  | Tb927.8.3890   | <a href="#">Tb927.8.3890</a>   | <a href="#">Tb927.8.3890</a>   | 5 | 59 | 78  | +186  | 792  | 1161047 | hypothetical protein, conserved          |
| 11 | Tb11.01.1340   | <a href="#">Tb11.01.1340</a>   | <a href="#">Tb11.01.1340</a>   | 2 | 59 | 44  | +36   | 396  | 2556159 | hypothetical protein, conserved          |
| 7  | Tb927.7.3390   | <a href="#">Tb927.7.3390</a>   | <a href="#">Tb927.7.3390</a>   | 4 | 58 | 26  | +135  | 1047 | 884821  | hypothetical protein, conserved          |
| 8  | Tb927.8.5610   | <a href="#">Tb927.8.5610</a>   | <a href="#">Tb927.8.5610</a>   | 3 | 58 | 31  | +81   | 1416 | 1665119 | hypothetical protein, conserved          |
| 10 | Tb10.70.5970   | <a href="#">Tb10.70.5970</a>   | <a href="#">Tb10.70.5970</a>   | 8 | 58 | 91  | +90   | 456  | 486205  | hypothetical protein, conserved          |
| 10 | Tb10.6k15.1220 | <a href="#">Tb10.6k15.1220</a> | <a href="#">Tb10.6k15.1220</a> | 4 | 55 | 87  | +198  | 3234 | 2236267 | isoleucyl-tRNA synthetase,               |
| 5  | Tb927.5.1150   | <a href="#">Tb927.5.1150</a>   | <a href="#">Tb927.5.1150</a>   | 5 | 54 | 62  | +39   | 2169 | 393097  | pre-mRNA RNA helicase                    |
| 10 | Tb10.61.2130   | <a href="#">Tb10.61.2130</a>   | <a href="#">Tb10.61.2130</a>   | 3 | 54 | 35  | +126  | 1857 | 3495367 | ATP-dependent DEAD/H RNA helicase        |
| 11 | Tb11.01.4290   | <a href="#">Tb11.01.4290</a>   | <a href="#">Tb11.01.4290</a>   | 4 | 53 | 15  | +72   | 1635 | 3266377 | hypothetical protein, conserved          |
| 11 | Tb11.02.4890   | <a href="#">Tb11.02.4890</a>   | <a href="#">Tb11.02.4890</a>   | 4 | 53 | 98  | +33   | 342  | 1956475 | pterin-4-alpha-carbinolamine dehydratase |
| 4  | Tb927.4.4810   | <a href="#">Tb927.4.4810</a>   | <a href="#">Tb927.4.4810</a>   | 2 | 52 | 61  | +399  | 696  | 1315998 | hypothetical protein, conserved          |
| 1  | Tb927.1.370    | <a href="#">Tb927.1.370</a>    | <a href="#">Tb927.1.370</a>    | 2 | 50 | 4   | +165  | 4182 | 144395  | leucine-rich repeat protein (LRRP),      |
| 9  | Tb09.160.0920  | <a href="#">Tb09.160.0920</a>  | <a href="#">Tb09.160.0920</a>  | 3 | 50 | 12  | +3273 | 1005 | 473133  | hypothetical protein, conserved          |
| 9  | Tb09.211.3760  | <a href="#">Tb09.211.3760</a>  | <a href="#">Tb09.211.3760</a>  | 2 | 50 | 4   | +735  | 861  | 1974713 | poly(ADP-ribose) glycohydrolase,         |
| 11 | Tb11.01.1380   | <a href="#">Tb11.01.1380</a>   | <a href="#">Tb11.01.1380</a>   | 2 | 50 | 30  | +42   | 2253 | 2564020 | hypothetical protein, conserved          |
| 11 | Tb11.02.0820   | <a href="#">Tb11.02.0820</a>   | <a href="#">Tb11.02.0820</a>   | 4 | 50 | 34  | +156  | 1068 | 951987  | ras-family member, GTP-binding protein   |
| 11 | Tb11.22.0011   | <a href="#">Tb11.22.0011</a>   | <a href="#">Tb11.22.0011</a>   | 4 | 50 | 20  | +78   | 3066 | 639451  | hypothetical protein, conserved          |
| 11 | Tb11.02.5470   | <a href="#">Tb11.02.5470</a>   | <a href="#">Tb11.02.5470</a>   | 4 | 48 | 100 | +159  | 600  | 2098252 | vacuolar type H+ ATPase subunit,         |
| 10 | Tb10.70.5830   | <a href="#">Tb10.70.5830</a>   | <a href="#">Tb10.70.5830</a>   | 2 | 47 | 15  | +147  | 1530 | 523989  | actin-like protein,                      |
| 10 | Tb10.6k15.2300 | <a href="#">Tb10.6k15.2300</a> | <a href="#">Tb10.6k15.2300</a> | 4 | 45 | 62  | +132  | 390  | 2020822 | hypothetical protein, conserved          |
| 7  | Tb927.7.6620   | <a href="#">Tb927.7.6620</a>   | <a href="#">Tb927.7.6620</a>   | 4 | 44 | 120 | +141  | 1482 | 1810332 | hypothetical protein, conserved          |
| 8  | Tb927.8.4470   | <a href="#">Tb927.8.4470</a>   | <a href="#">Tb927.8.4470</a>   | 4 | 44 | 9   | +57   | 657  | 1325310 | chaperone protein DNAJ,                  |
| 7  | Tb927.7.7510   | <a href="#">Tb927.7.7510</a>   | <a href="#">Tb927.7.7510</a>   | 3 | 43 | 54  | +39   | 699  | 2176343 | hypothetical protein                     |
| 10 | Tb10.70.7170   | <a href="#">Tb10.70.7170</a>   | <a href="#">Tb10.70.7170</a>   | 3 | 43 | 19  | +123  | 1821 | 267401  | hypothetical protein, conserved          |
| 3  | Tb927.3.2510   | <a href="#">Tb927.3.2510</a>   | <a href="#">Tb927.3.2510</a>   | 2 | 40 | 5   | +345  | 1026 | 633857  | expression site-associated gene 2,       |

|    |                     |                                     |                                     |          |           |           |            |            |                |                                        |
|----|---------------------|-------------------------------------|-------------------------------------|----------|-----------|-----------|------------|------------|----------------|----------------------------------------|
| 3  | Tb927.3.920         | <a href="#">Tb927.3.920</a>         | <a href="#">Tb927.3.920</a>         | 3        | 40        | 5         | +342       | 3468       | 213287         | hypothetical protein, conserved        |
| 4  | Tb927.4.2900        | <a href="#">Tb927.4.2900</a>        | <a href="#">Tb927.4.2900</a>        | 2        | 40        | 5         | +159       | 2757       | 768136         | hypothetical protein, conserved        |
| 10 | Tb10.70.5230        | <a href="#">Tb10.70.5230</a>        | <a href="#">Tb10.70.5230</a>        | 4        | 39        | 18        | +183       | 1971       | 637485         | hypothetical protein, conserved        |
| 11 | Tb11.01.4590        | <a href="#">Tb11.01.4590</a>        | <a href="#">Tb11.01.4590</a>        | 3        | 39        | 18        | +90        | 960        | 3344853        | hypothetical protein, conserved        |
| 11 | Tb11.01.4840        | <a href="#">Tb11.01.4840</a>        | <a href="#">Tb11.01.4840</a>        | 3        | 38        | 8         | +72        | 933        | 3496954        | hypothetical protein, conserved        |
| 10 | Tb10.26.0050        | <a href="#">Tb10.26.0050</a>        | <a href="#">Tb10.26.0050</a>        | 2        | 36        | 22        | +207       | 798        | 2817908        | hypothetical protein, conserved        |
| 1  | Tb927.1.2980        | <a href="#">Tb927.1.2980</a>        | <a href="#">Tb927.1.2980</a>        | 5        | 34        | 29        | +123       | 3417       | 658938         | hypothetical protein, conserved        |
| 10 | Tb10.61.0370        | <a href="#">Tb10.61.0370</a>        | <a href="#">Tb10.61.0370</a>        | 2        | 33        | 21        | +135       | 384        | 3853890        | hypothetical protein, conserved        |
| 7  | Tb927.7.450         | <a href="#">Tb927.7.450</a>         | <a href="#">Tb927.7.450</a>         | 2        | 30        | 23        | +1383      | 930        | 80862          | hypothetical protein, conserved        |
| 1  | Tb927.1.4220        | <a href="#">Tb927.1.4220</a>        | <a href="#">Tb927.1.4220</a>        | 5        | 29        | 118       | +87        | 1200       | 871865         | hypothetical protein, conserved        |
| 3  | Tb927.3.4810        | <a href="#">Tb927.3.4810</a>        | <a href="#">Tb927.3.4810</a>        | 4        | 29        | 28        | +42        | 810        | 1355759        | hypothetical protein, conserved        |
| 10 | Tb10.6k15.2630      | <a href="#">Tb10.6k15.2630</a>      | <a href="#">Tb10.6k15.2630</a>      | 5        | 29        | 137       | +93        | 600        | 1958565        | hypothetical protein, conserved        |
| 1  | Tb927.1.3410        | <a href="#">Tb927.1.3410</a>        | <a href="#">Tb927.1.3410</a>        | 3        | 28        | 50        | +183       | 1314       | 735770         | hypothetical protein, conserved        |
| 3  | Tb927.3.4870        | <a href="#">Tb927.3.4870</a>        | <a href="#">Tb927.3.4870</a>        | 3        | 25        | 40        | +69        | 972        | 1370695        | hypothetical protein, conserved        |
| 10 | Tb10.100.0045       | <a href="#">Tb10.100.0045</a>       | <a href="#">Tb10.100.0045</a>       | 6        | 25        | 12        | +78        | 525        | 67786          | hypothetical protein, conserved        |
| 11 | Tb11.01.0120        | <a href="#">Tb11.01.0120</a>        | <a href="#">Tb11.01.0120</a>        | 4        | 25        | 8         | +27        | 837        | 2304863        | haloacid dehalogenase-like hydrolase,  |
| 11 | Tb11.01.3900        | <a href="#">Tb11.01.3900</a>        | <a href="#">Tb11.01.3900</a>        | 3        | 25        | 12        | +138       | 621        | 3163689        | N-acetylglucosaminyl PI deacetylase    |
| 4  | Tb927.4.3980        | <a href="#">Tb927.4.3980</a>        | <a href="#">Tb927.4.3980</a>        | 2        | 23        | 43        | +27        | 1461       | 1058059        | chaperone protein DNAJ,                |
| 7  | Tb927.7.7110        | <a href="#">Tb927.7.7110</a>        | <a href="#">Tb927.7.7110</a>        | 2        | 23        | 74        | +294       | 1938       | 2035069        | leucine-rich repeat protein 1 (LRRP1)  |
| 4  | Tb927.4.730         | <a href="#">Tb927.4.730</a>         | <a href="#">Tb927.4.730</a>         | 3        | 22        | 9         | +246       | 1233       | 204893         | hypothetical protein, conserved        |
| 11 | Tb11.02.0353        | <a href="#">Tb11.02.0353</a>        | <a href="#">Tb11.02.0353</a>        | 5        | 22        | 43        | +858       | 1128       | 792927         | hypothetical protein, conserved        |
| 3  | Tb927.3.3160        | <a href="#">Tb927.3.3160</a>        | <a href="#">Tb927.3.3160</a>        | 2        | 20        | 15        | +1103      | 1011       | 814216         | poly(A) polymerase                     |
| 7  | Tb927.7.6470        | <a href="#">Tb927.7.6470</a>        | <a href="#">Tb927.7.6470</a>        | 4        | 20        | 20        | +105       | 1119       | 1756990        | O-sialoglycoprotein endopeptidase      |
| 7  | Tb927.7.790         | <a href="#">Tb927.7.790</a>         | <a href="#">Tb927.7.790</a>         | 3        | 19        | 16        | +96        | 1608       | 180728         | hypothetical protein, conserved        |
| 3  | Tb927.3.4700        | <a href="#">Tb927.3.4700</a>        | <a href="#">Tb927.3.4700</a>        | 4        | 18        | 11        | +36        | 1152       | 1328737        | hypothetical protein, conserved        |
| 4  | Tb927.4.4370        | <a href="#">Tb927.4.4370</a>        | <a href="#">Tb927.4.4370</a>        | 5        | 18        | 76        | +120       | 1653       | 1153147        | hypothetical protein, conserved        |
| 8  | Tb927.8.2140        | <a href="#">Tb927.8.2140</a>        | <a href="#">Tb927.8.2140</a>        | 2        | 18        | 17        | +81        | 618        | 665195         | hypothetical protein, conserved        |
| 8  | <b>Tb927.8.4760</b> | <b><a href="#">Tb927.8.4760</a></b> | <b><a href="#">Tb927.8.4760</a></b> | <b>4</b> | <b>18</b> | <b>65</b> | <b>+63</b> | <b>735</b> | <b>1397151</b> | <b>hypothetical protein, conserved</b> |

|    |                                |                                |                                |   |    |     |      |      |         |                                     |
|----|--------------------------------|--------------------------------|--------------------------------|---|----|-----|------|------|---------|-------------------------------------|
| 9  | <a href="#">Tb09.211.2460</a>  | <a href="#">Tb09.211.2460</a>  | <a href="#">Tb09.211.2460</a>  | 2 | 18 | 11  | +360 | 2286 | 1717515 | hypothetical protein, conserved     |
| 3  | <a href="#">Tb927.3.2620</a>   | <a href="#">Tb927.3.2620</a>   | <a href="#">Tb927.3.2620</a>   | 3 | 15 | 82  | +204 | 5850 | 668683  | hypothetical protein, conserved     |
| 2  | <a href="#">Tb927.2.4420</a>   | <a href="#">Tb927.2.4420</a>   | <a href="#">Tb927.2.4420</a>   | 2 | 14 | 14  | +246 | 888  | 785863  | hypothetical protein, conserved     |
| 11 | <a href="#">Tb11.01.5260</a>   | <a href="#">Tb11.01.5260</a>   | <a href="#">Tb11.01.5260</a>   | 6 | 13 | 63  | +81  | 510  | 3587767 | radial spoke protein RSP11,         |
| 11 | <a href="#">Tb11.02.3060</a>   | <a href="#">Tb11.02.3060</a>   | <a href="#">Tb11.02.3060</a>   | 2 | 13 | 30  | +303 | 546  | 1509398 | hypothetical protein, conserved     |
| 9  | <a href="#">Tb09.244.2840</a>  | <a href="#">Tb09.244.2840</a>  | <a href="#">Tb09.244.2840</a>  | 2 | 11 | 65  | +147 | 468  | 2290563 | hypothetical protein, conserved     |
| 11 | <a href="#">Tb11.03.0370</a>   | <a href="#">Tb11.03.0370</a>   | <a href="#">Tb11.03.0370</a>   | 2 | 11 | 18  | +63  | 975  | 192602  | hypothetical protein, conserved     |
| 3  | <a href="#">Tb927.3.2170</a>   | <a href="#">Tb927.3.2170</a>   | <a href="#">Tb927.3.2170</a>   | 3 | 10 | 20  | +765 | 1908 | 571964  | translation elongation factor EF-2, |
| 10 | <a href="#">Tb10.6k15.2130</a> | <a href="#">Tb10.6k15.2130</a> | <a href="#">Tb10.6k15.2130</a> | 2 | 10 | 20  | +90  | 1440 | 2044045 | ribonuclease,                       |
| 3  | <a href="#">Tb927.3.2030</a>   | <a href="#">Tb927.3.2030</a>   | <a href="#">Tb927.3.2030</a>   | 4 | 9  | 33  | +51  | 282  | 528128  | acylphosphatase,                    |
| 7  | <a href="#">Tb927.7.6760</a>   | <a href="#">Tb927.7.6760</a>   | <a href="#">Tb927.7.6760</a>   | 3 | 8  | 26  | +306 | 3405 | 1871025 | hypothetical protein, conserved     |
| 9  | <a href="#">Tb09.211.3610</a>  | <a href="#">Tb09.211.3610</a>  | <a href="#">Tb09.211.3610</a>  | 7 | 8  | 305 | +138 | 3507 | 1935292 | ubiquitin-activating enzyme E1,     |
| 3  | <a href="#">Tb927.3.5430</a>   | <a href="#">Tb927.3.5430</a>   | <a href="#">Tb927.3.5430</a>   | 2 | 7  | 28  | +21  | 795  | 1519786 | hypothetical protein, conserved     |
| 9  | <a href="#">Tb09.160.1780</a>  | <a href="#">Tb09.160.1780</a>  | <a href="#">Tb09.160.1780</a>  | 2 | 7  | 27  | +105 | 2967 | 630333  | protein kinase,                     |
| 8  | <a href="#">Tb927.8.4760</a>   | <a href="#">Tb927.8.4760</a>   | <a href="#">Tb927.8.4760</a>   | 4 | 5  | 65  | +162 | 636  | 1397052 | hypothetical protein, conserved     |

## CATEGORY 2

There are 178 genes where my analysis of splice-site data indicates that the ORF assigned in TrypDB is incorrect. For > 90% of the tagged splice sites, there is an upstream in-frame ATG that would be expected to encode the start of the protein.

For an additional 23 genes, where between 25 and 88% of the predicted SAS precede an upstream ATG, alternative splicing could produce different versions of the protein. I do not know why the gene-prediction algorithms did not predict the longest ORF from the first in-frame ATG. The table lists the newly predicted ATG (relative to the original prediction), ORF start and ORF length.

The table has been sorted first by the % of SAS hits that predict one specific upstream ATG, then by chromosome and GeneID. In cases where there are only a few sequence tag hits per gene (or per SAS), the data should be viewed with caution and checked if it is an important gene for you.

| Chr | GeneID       | TrypDB                       | TriTrypDB                    | SAS<br>per<br>Gene | SAS<br>% for<br>ATG | Hits<br>per<br>Gene | ATG Diff | ORF<br>Length<br>True | ORF Start<br>True | Abbreviated Description from TrypDB |
|-----|--------------|------------------------------|------------------------------|--------------------|---------------------|---------------------|----------|-----------------------|-------------------|-------------------------------------|
| 2   | Tb927.2.2550 | <a href="#">Tb927.2.2550</a> | <a href="#">Tb927.2.2550</a> | 1                  | 100                 | 7                   | -183     | 1728                  | 503563            | hypothetical protein, conserved     |
| 2   | Tb927.2.2880 | <a href="#">Tb927.2.2880</a> | <a href="#">Tb927.2.2880</a> | 3                  | 100                 | 4                   | -9       | 1302                  | 551545            | hypothetical protein, conserved     |
| 2   | Tb927.2.5200 | <a href="#">Tb927.2.5200</a> | <a href="#">Tb927.2.5200</a> | 3                  | 100                 | 12                  | -114     | 2142                  | 915057            | hypothetical protein, conserved     |
| 2   | Tb927.2.940  | <a href="#">Tb927.2.940</a>  | <a href="#">Tb927.2.940</a>  | 3                  | 100                 | 6                   | -66      | 363                   | 158095            | hypothetical protein                |
| 3   | Tb927.3.1620 | <a href="#">Tb927.3.1620</a> | <a href="#">Tb927.3.1620</a> | 1                  | 100                 | 10                  | -96      | 4896                  | 428061            | hypothetical protein, conserved     |
| 3   | Tb927.3.1680 | <a href="#">Tb927.3.1680</a> | <a href="#">Tb927.3.1680</a> | 2                  | 100                 | 144                 | -60      | 1017                  | 444390            | hypothetical protein, conserved     |
| 3   | Tb927.3.1820 | <a href="#">Tb927.3.1820</a> | <a href="#">Tb927.3.1820</a> | 1                  | 100                 | 5                   | -132     | 870                   | 473676            | hypothetical protein, conserved     |
| 3   | Tb927.3.2610 | <a href="#">Tb927.3.2610</a> | <a href="#">Tb927.3.2610</a> | 1                  | 100                 | 7                   | -102     | 2448                  | 662234            | hypothetical protein, conserved     |
| 3   | Tb927.3.2720 | <a href="#">Tb927.3.2720</a> | <a href="#">Tb927.3.2720</a> | 1                  | 100                 | 4                   | -363     | 1305                  | 695060            | hypothetical protein                |
| 3   | Tb927.3.4070 | <a href="#">Tb927.3.4070</a> | <a href="#">Tb927.3.4070</a> | 1                  | 100                 | 257                 | -30      | 1788                  | 1150052           | hypothetical protein, conserved     |
| 3   | Tb927.3.4080 | <a href="#">Tb927.3.4080</a> | <a href="#">Tb927.3.4080</a> | 1                  | 100                 | 252                 | -36      | 1752                  | 1152313           | hypothetical protein, conserved     |
| 3   | Tb927.3.4090 | <a href="#">Tb927.3.4090</a> | <a href="#">Tb927.3.4090</a> | 1                  | 100                 | 222                 | -36      | 1788                  | 1154649           | hypothetical protein, conserved     |
| 3   | Tb927.3.4100 | <a href="#">Tb927.3.4100</a> | <a href="#">Tb927.3.4100</a> | 1                  | 100                 | 252                 | -30      | 1758                  | 1156968           | hypothetical protein, conserved     |
| 3   | Tb927.3.4280 | <a href="#">Tb927.3.4280</a> | <a href="#">Tb927.3.4280</a> | 1                  | 100                 | 18                  | -174     | 2373                  | 1208542           | mismatch repair protein MSH5,       |
| 3   | Tb927.3.4360 | <a href="#">Tb927.3.4360</a> | <a href="#">Tb927.3.4360</a> | 3                  | 100                 | 793                 | -120     | 393                   | 1223845           | 40S ribosomal protein S15a,         |
| 3   | Tb927.3.4570 | <a href="#">Tb927.3.4570</a> | <a href="#">Tb927.3.4570</a> | 1                  | 100                 | 15                  | -27      | 2190                  | 1279149           | N-acetylglucosaminyltransferase,    |

|   |              |                              |                              |   |     |    |      |       |         |                                             |
|---|--------------|------------------------------|------------------------------|---|-----|----|------|-------|---------|---------------------------------------------|
| 3 | Tb927.3.4950 | <a href="#">Tb927.3.4950</a> | <a href="#">Tb927.3.4950</a> | 3 | 100 | 27 | -75  | 1500  | 1387003 | hypothetical protein, conserved             |
| 3 | Tb927.3.5030 | <a href="#">Tb927.3.5030</a> | <a href="#">Tb927.3.5030</a> | 1 | 100 | 12 | -24  | 2238  | 1412962 | KU70 protein                                |
| 3 | Tb927.3.5150 | <a href="#">Tb927.3.5150</a> | <a href="#">Tb927.3.5150</a> | 1 | 100 | 43 | -114 | 990   | 1445889 | exonuclease,                                |
| 3 | Tb927.3.5320 | <a href="#">Tb927.3.5320</a> | <a href="#">Tb927.3.5320</a> | 5 | 100 | 6  | -27  | 1212  | 1496089 | hypothetical protein, conserved             |
| 3 | Tb927.3.990  | <a href="#">Tb927.3.990</a>  | <a href="#">Tb927.3.990</a>  | 1 | 100 | 32 | -132 | 1572  | 243247  | hypothetical protein, conserved             |
| 4 | Tb927.4.1230 | <a href="#">Tb927.4.1230</a> | <a href="#">Tb927.4.1230</a> | 1 | 100 | 30 | -207 | 996   | 330303  | hypothetical protein                        |
| 4 | Tb927.4.1310 | <a href="#">Tb927.4.1310</a> | <a href="#">Tb927.4.1310</a> | 2 | 100 | 25 | -165 | 1416  | 344695  | hypothetical protein, conserved, ZFP family |
| 4 | Tb927.4.1350 | <a href="#">Tb927.4.1350</a> | <a href="#">Tb927.4.1350</a> | 2 | 100 | 14 | -441 | 1434  | 356010  | glyoxalase                                  |
| 4 | Tb927.4.1980 | <a href="#">Tb927.4.1980</a> | <a href="#">Tb927.4.1980</a> | 1 | 100 | 3  | -51  | 2547  | 502463  | hypothetical protein, conserved             |
| 4 | Tb927.4.2710 | <a href="#">Tb927.4.2710</a> | <a href="#">Tb927.4.2710</a> | 1 | 100 | 38 | -15  | 492   | 715143  | ubiquitin-conjugating enzyme E2             |
| 4 | Tb927.4.3530 | <a href="#">Tb927.4.3530</a> | <a href="#">Tb927.4.3530</a> | 2 | 100 | 19 | -132 | 2265  | 909546  | hypothetical protein, conserved             |
| 4 | Tb927.4.3710 | <a href="#">Tb927.4.3710</a> | <a href="#">Tb927.4.3710</a> | 1 | 100 | 22 | -156 | 510   | 937775  | hypothetical protein, conserved             |
| 4 | Tb927.4.3840 | <a href="#">Tb927.4.3840</a> | <a href="#">Tb927.4.3840</a> | 4 | 100 | 57 | -162 | 1740  | 1003799 | nucleolar protein,                          |
| 4 | Tb927.4.4300 | <a href="#">Tb927.4.4300</a> | <a href="#">Tb927.4.4300</a> | 1 | 100 | 3  | -159 | 1851  | 1139536 | hypothetical protein, conserved             |
| 4 | Tb927.4.4740 | <a href="#">Tb927.4.4740</a> | <a href="#">Tb927.4.4740</a> | 1 | 100 | 35 | -24  | 1203  | 1304917 | hypothetical protein, conserved             |
| 4 | Tb927.4.4920 | <a href="#">Tb927.4.4920</a> | <a href="#">Tb927.4.4920</a> | 1 | 100 | 76 | -90  | 777   | 1347976 | hypothetical protein, conserved             |
| 4 | Tb927.4.5170 | <a href="#">Tb927.4.5170</a> | <a href="#">Tb927.4.5170</a> | 1 | 100 | 8  | -138 | 642   | 1413846 | ribosomal protein L7/L12,                   |
| 4 | Tb927.4.870  | <a href="#">Tb927.4.870</a>  | <a href="#">Tb927.4.870</a>  | 1 | 100 | 3  | -453 | 13800 | 252137  | dynein heavy chain,                         |
| 4 | Tb927.4.970  | <a href="#">Tb927.4.970</a>  | <a href="#">Tb927.4.970</a>  | 2 | 100 | 23 | -105 | 669   | 267912  | hypothetical protein, conserved             |
| 5 | Tb927.5.1380 | <a href="#">Tb927.5.1380</a> | <a href="#">Tb927.5.1380</a> | 1 | 100 | 2  | -282 | 858   | 444039  | hypothetical protein                        |
| 5 | Tb927.5.1980 | <a href="#">Tb927.5.1980</a> | <a href="#">Tb927.5.1980</a> | 2 | 100 | 16 | -234 | 1950  | 611407  | hypothetical protein, conserved             |
| 5 | Tb927.5.2360 | <a href="#">Tb927.5.2360</a> | <a href="#">Tb927.5.2360</a> | 2 | 100 | 4  | -156 | 2262  | 749008  | hypothetical protein, conserved             |
| 5 | Tb927.5.3170 | <a href="#">Tb927.5.3170</a> | <a href="#">Tb927.5.3170</a> | 1 | 100 | 2  | -888 | 1962  | 992910  | ribose-phosphate pyrophosphokinase          |
| 5 | Tb927.5.3300 | <a href="#">Tb927.5.3300</a> | <a href="#">Tb927.5.3300</a> | 2 | 100 | 80 | -156 | 648   | 1038903 | hypothetical protein, conserved             |
| 5 | Tb927.5.3780 | <a href="#">Tb927.5.3780</a> | <a href="#">Tb927.5.3780</a> | 1 | 100 | 3  | -90  | 1254  | 1175492 | hypothetical protein, conserved             |
| 5 | Tb927.5.650  | <a href="#">Tb927.5.650</a>  | <a href="#">Tb927.5.650</a>  | 4 | 100 | 9  | -96  | 3846  | 223645  | receptor-type adenylate cyclase GRESAG 4    |
| 5 | Tb927.5.820  | <a href="#">Tb927.5.820</a>  | <a href="#">Tb927.5.820</a>  | 3 | 100 | 7  | -408 | 1035  | 282974  | hypothetical protein, conserved             |
| 6 | Tb927.6.1590 | <a href="#">Tb927.6.1590</a> | <a href="#">Tb927.6.1590</a> | 1 | 100 | 24 | -141 | 1545  | 548029  | hypothetical protein, conserved             |

|   |              |                              |                              |   |     |    |      |      |         |                                       |
|---|--------------|------------------------------|------------------------------|---|-----|----|------|------|---------|---------------------------------------|
| 6 | Tb927.6.2550 | <a href="#">Tb927.6.2550</a> | <a href="#">Tb927.6.2550</a> | 2 | 100 | 27 | -93  | 2268 | 771666  | RNA-binding protein,                  |
| 6 | Tb927.6.2660 | <a href="#">Tb927.6.2660</a> | <a href="#">Tb927.6.2660</a> | 2 | 100 | 11 | -177 | 3327 | 800724  | hypothetical protein, conserved       |
| 6 | Tb927.6.2690 | <a href="#">Tb927.6.2690</a> | <a href="#">Tb927.6.2690</a> | 1 | 100 | 5  | -123 | 2043 | 807701  | ubiquitin carboxyl-terminal hydrolase |
| 6 | Tb927.6.2920 | <a href="#">Tb927.6.2920</a> | <a href="#">Tb927.6.2920</a> | 1 | 100 | 6  | -294 | 2253 | 874885  | hypothetical protein, conserved       |
| 6 | Tb927.6.3060 | <a href="#">Tb927.6.3060</a> | <a href="#">Tb927.6.3060</a> | 2 | 100 | 33 | -150 | 711  | 907031  | hypothetical protein, conserved       |
| 6 | Tb927.6.3130 | <a href="#">Tb927.6.3130</a> | <a href="#">Tb927.6.3130</a> | 1 | 100 | 10 | -120 | 1344 | 923896  | queuine tRNA-ribosyltransferase       |
| 6 | Tb927.6.3350 | <a href="#">Tb927.6.3350</a> | <a href="#">Tb927.6.3350</a> | 1 | 100 | 4  | -183 | 1596 | 982414  | hypothetical protein, conserved       |
| 6 | Tb927.6.4360 | <a href="#">Tb927.6.4360</a> | <a href="#">Tb927.6.4360</a> | 3 | 100 | 29 | -21  | 405  | 1229188 | hypothetical protein, conserved       |
| 6 | Tb927.6.4550 | <a href="#">Tb927.6.4550</a> | <a href="#">Tb927.6.4550</a> | 2 | 100 | 5  | -132 | 2406 | 1275264 | hypothetical protein, conserved       |
| 6 | Tb927.6.4950 | <a href="#">Tb927.6.4950</a> | <a href="#">Tb927.6.4950</a> | 3 | 100 | 40 | -60  | 504  | 1365428 | mago nashi-like protein,              |
| 6 | Tb927.6.570  | <a href="#">Tb927.6.570</a>  | <a href="#">Tb927.6.570</a>  | 1 | 100 | 81 | -51  | 366  | 239804  | hypothetical protein, conserved       |
| 7 | Tb927.7.1030 | <a href="#">Tb927.7.1030</a> | <a href="#">Tb927.7.1030</a> | 2 | 100 | 27 | -99  | 2613 | 265231  | heat shock 70 kDa protein,            |
| 7 | Tb927.7.1090 | <a href="#">Tb927.7.1090</a> | <a href="#">Tb927.7.1090</a> | 4 | 100 | 12 | -213 | 4839 | 277535  | hypothetical protein, conserved       |
| 7 | Tb927.7.1610 | <a href="#">Tb927.7.1610</a> | <a href="#">Tb927.7.1610</a> | 1 | 100 | 18 | -15  | 1962 | 404547  | 6-phosphofructo-2-kinase              |
| 7 | Tb927.7.2610 | <a href="#">Tb927.7.2610</a> | <a href="#">Tb927.7.2610</a> | 1 | 100 | 2  | -291 | 1179 | 670966  | hypothetical protein, conserved       |
| 7 | Tb927.7.2630 | <a href="#">Tb927.7.2630</a> | <a href="#">Tb927.7.2630</a> | 1 | 100 | 14 | -63  | 2766 | 675448  | hypothetical protein, conserved       |
| 7 | Tb927.7.3280 | <a href="#">Tb927.7.3280</a> | <a href="#">Tb927.7.3280</a> | 3 | 100 | 14 | -198 | 2364 | 846746  | translation initiation factor IF-2,   |
| 7 | Tb927.7.3340 | <a href="#">Tb927.7.3340</a> | <a href="#">Tb927.7.3340</a> | 1 | 100 | 6  | -249 | 1782 | 874847  | hypothetical protein, conserved       |
| 7 | Tb927.7.3970 | <a href="#">Tb927.7.3970</a> | <a href="#">Tb927.7.3970</a> | 1 | 100 | 13 | -90  | 963  | 1039338 | hypothetical protein, conserved       |
| 7 | Tb927.7.4110 | <a href="#">Tb927.7.4110</a> | <a href="#">Tb927.7.4110</a> | 2 | 100 | 11 | -21  | 2706 | 1088478 | kinesin,                              |
| 7 | Tb927.7.4310 | <a href="#">Tb927.7.4310</a> | <a href="#">Tb927.7.4310</a> | 1 | 100 | 2  | -108 | 1542 | 1144820 | hypothetical protein, conserved       |
| 7 | Tb927.7.5280 | <a href="#">Tb927.7.5280</a> | <a href="#">Tb927.7.5280</a> | 1 | 100 | 8  | -177 | 6207 | 1395554 | hypothetical protein, conserved       |
| 7 | Tb927.7.6270 | <a href="#">Tb927.7.6270</a> | <a href="#">Tb927.7.6270</a> | 2 | 100 | 6  | -42  | 1263 | 1698787 | peptidase T,                          |
| 7 | Tb927.7.6690 | <a href="#">Tb927.7.6690</a> | <a href="#">Tb927.7.6690</a> | 1 | 100 | 10 | -258 | 1467 | 1849254 | hypothetical protein                  |
| 7 | Tb927.7.6750 | <a href="#">Tb927.7.6750</a> | <a href="#">Tb927.7.6750</a> | 2 | 100 | 6  | -501 | 2187 | 1866795 | hypothetical protein, conserved       |
| 7 | Tb927.7.7050 | <a href="#">Tb927.7.7050</a> | <a href="#">Tb927.7.7050</a> | 1 | 100 | 39 | -165 | 2898 | 2017419 | hypothetical protein, conserved       |
| 7 | Tb927.7.7440 | <a href="#">Tb927.7.7440</a> | <a href="#">Tb927.7.7440</a> | 4 | 100 | 84 | -48  | 420  | 2137654 | hypothetical protein, conserved       |
| 8 | Tb927.8.1770 | <a href="#">Tb927.8.1770</a> | <a href="#">Tb927.8.1770</a> | 1 | 100 | 8  | -18  | 1581 | 581271  | hypothetical protein, conserved       |



|    |               |                               |                               |   |     |    |      |      |         |                                            |
|----|---------------|-------------------------------|-------------------------------|---|-----|----|------|------|---------|--------------------------------------------|
| 8  | Tb927.8.3600  | <a href="#">Tb927.8.3600</a>  | <a href="#">Tb927.8.3600</a>  | 4 | 100 | 32 | -72  | 339  | 1081815 | hypothetical protein, conserved            |
| 8  | Tb927.8.4250  | <a href="#">Tb927.8.4250</a>  | <a href="#">Tb927.8.4250</a>  | 1 | 100 | 24 | -168 | 1401 | 1264723 | hypothetical protein, conserved            |
| 8  | Tb927.8.5230  | <a href="#">Tb927.8.5230</a>  | <a href="#">Tb927.8.5230</a>  | 1 | 100 | 15 | -117 | 849  | 1563400 | cyclophilin-type peptidyl-prolyl isomerase |
| 8  | Tb927.8.850   | <a href="#">Tb927.8.850</a>   | <a href="#">Tb927.8.850</a>   | 2 | 100 | 18 | -69  | 2337 | 249641  | hypothetical protein, conserved            |
| 9  | Tb09.160.0360 | <a href="#">Tb09.160.0360</a> | <a href="#">Tb09.160.0360</a> | 8 | 100 | 7  | -399 | 1014 | 332395  | hypothetical protein, conserved            |
| 9  | Tb09.160.0460 | <a href="#">Tb09.160.0460</a> | <a href="#">Tb09.160.0460</a> | 3 | 100 | 23 | -345 | 1494 | 350355  | hypothetical protein, conserved            |
| 9  | Tb09.160.0780 | <a href="#">Tb09.160.0780</a> | <a href="#">Tb09.160.0780</a> | 1 | 100 | 15 | -3   | 1929 | 437909  | syntaxin binding protein 1,                |
| 9  | Tb09.160.0790 | <a href="#">Tb09.160.0790</a> | <a href="#">Tb09.160.0790</a> | 1 | 100 | 52 | -36  | 2115 | 440569  | hypothetical protein, conserved            |
| 9  | Tb09.160.0810 | <a href="#">Tb09.160.0810</a> | <a href="#">Tb09.160.0810</a> | 1 | 100 | 26 | -84  | 1392 | 444222  | kynureninase,                              |
| 9  | Tb09.160.0840 | <a href="#">Tb09.160.0840</a> | <a href="#">Tb09.160.0840</a> | 3 | 100 | 33 | -171 | 1251 | 450997  | membrane protein YIP1,                     |
| 9  | Tb09.160.2110 | <a href="#">Tb09.160.2110</a> | <a href="#">Tb09.160.2110</a> | 1 | 100 | 26 | -120 | 552  | 663196  | hypothetical protein, conserved            |
| 9  | Tb09.160.4770 | <a href="#">Tb09.160.4770</a> | <a href="#">Tb09.160.4770</a> | 1 | 100 | 3  | -102 | 2181 | 1026509 | protein kinase,                            |
| 9  | Tb09.160.5670 | <a href="#">Tb09.160.5670</a> | <a href="#">Tb09.160.5670</a> | 1 | 100 | 2  | -33  | 4089 | 1218037 | hypothetical protein, conserved            |
| 9  | Tb09.211.0590 | <a href="#">Tb09.211.0590</a> | <a href="#">Tb09.211.0590</a> | 1 | 100 | 16 | -255 | 1581 | 1369056 | tRNA nucleotidyltransferase,               |
| 9  | Tb09.211.1150 | <a href="#">Tb09.211.1150</a> | <a href="#">Tb09.211.1150</a> | 1 | 100 | 48 | -105 | 639  | 1471782 | hypothetical protein, conserved            |
| 9  | Tb09.211.1190 | <a href="#">Tb09.211.1190</a> | <a href="#">Tb09.211.1190</a> | 1 | 100 | 5  | -36  | 2322 | 1478511 | minichromosome maintenance complex         |
| 9  | Tb09.211.1330 | <a href="#">Tb09.211.1330</a> | <a href="#">Tb09.211.1330</a> | 2 | 100 | 45 | -48  | 684  | 1503481 | membrane-trafficking protein,              |
| 9  | Tb09.211.2160 | <a href="#">Tb09.211.2160</a> | <a href="#">Tb09.211.2160</a> | 1 | 100 | 14 | -315 | 918  | 1654887 | hypothetical protein                       |
| 9  | Tb09.211.2960 | <a href="#">Tb09.211.2960</a> | <a href="#">Tb09.211.2960</a> | 1 | 100 | 40 | -51  | 654  | 1795318 | hypothetical protein, conserved            |
| 9  | Tb09.244.2670 | <a href="#">Tb09.244.2670</a> | <a href="#">Tb09.244.2670</a> | 2 | 100 | 14 | -24  | 1632 | 2315907 | hypothetical protein, conserved            |
| 10 | Tb10.26.0040  | <a href="#">Tb10.26.0040</a>  | <a href="#">Tb10.26.0040</a>  | 2 | 100 | 8  | -186 | 1233 | 2819675 | hypothetical protein, conserved            |
| 10 | Tb10.26.0200  | <a href="#">Tb10.26.0200</a>  | <a href="#">Tb10.26.0200</a>  | 2 | 100 | 39 | -84  | 621  | 2789465 | guanylate kinase,                          |
| 10 | Tb10.26.0220  | <a href="#">Tb10.26.0220</a>  | <a href="#">Tb10.26.0220</a>  | 1 | 100 | 18 | -132 | 2958 | 2783540 | chloride channel protein,                  |
| 10 | Tb10.26.0300  | <a href="#">Tb10.26.0300</a>  | <a href="#">Tb10.26.0300</a>  | 1 | 100 | 37 | -273 | 690  | 2763123 | hypothetical protein, conserved            |
| 10 | Tb10.26.0330  | <a href="#">Tb10.26.0330</a>  | <a href="#">Tb10.26.0330</a>  | 2 | 100 | 9  | -102 | 5094 | 2751262 | hypothetical protein, conserved, WD40      |
| 10 | Tb10.26.0340  | <a href="#">Tb10.26.0340</a>  | <a href="#">Tb10.26.0340</a>  | 1 | 100 | 11 | -42  | 2202 | 2748627 | hypothetical protein, conserved            |
| 10 | Tb10.26.0350  | <a href="#">Tb10.26.0350</a>  | <a href="#">Tb10.26.0350</a>  | 1 | 100 | 4  | -33  | 1233 | 2747020 | hypothetical protein, conserved            |
| 10 | Tb10.26.0400  | <a href="#">Tb10.26.0400</a>  | <a href="#">Tb10.26.0400</a>  | 2 | 100 | 10 | -210 | 1281 | 2738398 | hypothetical protein, conserved            |

|    |               |                               |                               |   |     |    |      |      |         |                                            |
|----|---------------|-------------------------------|-------------------------------|---|-----|----|------|------|---------|--------------------------------------------|
| 10 | Tb10.26.0410  | <a href="#">Tb10.26.0410</a>  | <a href="#">Tb10.26.0410</a>  | 1 | 100 | 4  | -366 | 1014 | 2736441 | hypothetical protein, conserved            |
| 10 | Tb10.26.0430  | <a href="#">Tb10.26.0430</a>  | <a href="#">Tb10.26.0430</a>  | 1 | 100 | 11 | -90  | 1914 | 2733779 | hypothetical protein, conserved            |
| 10 | Tb10.26.0520  | <a href="#">Tb10.26.0520</a>  | <a href="#">Tb10.26.0520</a>  | 1 | 100 | 4  | -81  | 1002 | 2716545 | hypothetical protein, conserved            |
| 10 | Tb10.26.0550  | <a href="#">Tb10.26.0550</a>  | <a href="#">Tb10.26.0550</a>  | 2 | 100 | 15 | -279 | 1518 | 2708676 | hypothetical protein, conserved            |
| 10 | Tb10.26.0590  | <a href="#">Tb10.26.0590</a>  | <a href="#">Tb10.26.0590</a>  | 1 | 100 | 18 | -336 | 2034 | 2702920 | protein phosphatase 2a regulatory subunit  |
| 10 | Tb10.26.0600  | <a href="#">Tb10.26.0600</a>  | <a href="#">Tb10.26.0600</a>  | 4 | 100 | 35 | -60  | 462  | 2701792 | hypothetical protein, conserved            |
| 10 | Tb10.26.0690  | <a href="#">Tb10.26.0690</a>  | <a href="#">Tb10.26.0690</a>  | 1 | 100 | 4  | -258 | 1302 | 2689136 | hypothetical protein, conserved            |
| 10 | Tb10.26.0770  | <a href="#">Tb10.26.0770</a>  | <a href="#">Tb10.26.0770</a>  | 3 | 100 | 31 | -93  | 1287 | 2679398 | hypothetical protein, conserved            |
| 10 | Tb10.26.0860  | <a href="#">Tb10.26.0860</a>  | <a href="#">Tb10.26.0860</a>  | 1 | 100 | 27 | -282 | 1014 | 2661341 | HIRA-interacting protein 5,                |
| 10 | Tb10.26.0930  | <a href="#">Tb10.26.0930</a>  | <a href="#">Tb10.26.0930</a>  | 2 | 100 | 28 | -216 | 2538 | 2646857 | hypothetical protein, conserved            |
| 10 | Tb10.26.1000  | <a href="#">Tb10.26.1000</a>  | <a href="#">Tb10.26.1000</a>  | 2 | 100 | 11 | -6   | 945  | 2628693 | hypothetical protein, conserved            |
| 10 | Tb10.389.0210 | <a href="#">Tb10.389.0210</a> | <a href="#">Tb10.389.0210</a> | 1 | 100 | 7  | -72  | 1860 | 3151841 | hypothetical protein, conserved            |
| 10 | Tb10.389.0340 | <a href="#">Tb10.389.0340</a> | <a href="#">Tb10.389.0340</a> | 3 | 100 | 12 | -171 | 1206 | 3122346 | mitochondrial carrier protein              |
| 10 | Tb10.389.1270 | <a href="#">Tb10.389.1270</a> | <a href="#">Tb10.389.1270</a> | 1 | 100 | 9  | -105 | 2604 | 2944462 | kinesin,                                   |
| 10 | Tb10.389.1400 | <a href="#">Tb10.389.1400</a> | <a href="#">Tb10.389.1400</a> | 2 | 100 | 5  | -33  | 2712 | 2924574 | hypothetical protein, conserved            |
| 10 | Tb10.389.1770 | <a href="#">Tb10.389.1770</a> | <a href="#">Tb10.389.1770</a> | 2 | 100 | 25 | -30  | 1170 | 2850529 | hypothetical protein, conserved            |
| 10 | Tb10.389.1780 | <a href="#">Tb10.389.1780</a> | <a href="#">Tb10.389.1780</a> | 2 | 100 | 19 | -36  | 432  | 2849589 | hypothetical protein, conserved            |
| 10 | Tb10.389.1870 | <a href="#">Tb10.389.1870</a> | <a href="#">Tb10.389.1870</a> | 1 | 100 | 3  | -153 | 1455 | 2833645 | hypothetical protein, conserved            |
| 10 | Tb10.406.0190 | <a href="#">Tb10.406.0190</a> | <a href="#">Tb10.406.0190</a> | 2 | 100 | 41 | -54  | 1128 | 2559577 | hypothetical protein, conserved            |
| 10 | Tb10.61.0260  | <a href="#">Tb10.61.0260</a>  | <a href="#">Tb10.61.0260</a>  | 1 | 100 | 2  | -120 | 1062 | 3876192 | hypothetical protein, conserved            |
| 10 | Tb10.61.0340  | <a href="#">Tb10.61.0340</a>  | <a href="#">Tb10.61.0340</a>  | 1 | 100 | 29 | -315 | 1416 | 3857674 | cation transporter,                        |
| 10 | Tb10.61.0690  | <a href="#">Tb10.61.0690</a>  | <a href="#">Tb10.61.0690</a>  | 1 | 100 | 13 | -27  | 1767 | 3765055 | tRNA pseudouridine synthase A-like protein |
| 10 | Tb10.61.0860  | <a href="#">Tb10.61.0860</a>  | <a href="#">Tb10.61.0860</a>  | 1 | 100 | 39 | -153 | 759  | 3735051 | hypothetical protein, conserved            |
| 10 | Tb10.61.2510  | <a href="#">Tb10.61.2510</a>  | <a href="#">Tb10.61.2510</a>  | 1 | 100 | 10 | -342 | 912  | 3400076 | mitochondrial carrier protein,             |
| 10 | Tb10.61.2900  | <a href="#">Tb10.61.2900</a>  | <a href="#">Tb10.61.2900</a>  | 1 | 100 | 42 | -6   | 627  | 3334072 | hypothetical protein, conserved            |
| 10 | Tb10.61.3020  | <a href="#">Tb10.61.3020</a>  | <a href="#">Tb10.61.3020</a>  | 2 | 100 | 8  | -12  | 1824 | 3320463 | hypothetical protein, conserved            |
| 10 | Tb10.61.3120  | <a href="#">Tb10.61.3120</a>  | <a href="#">Tb10.61.3120</a>  | 4 | 100 | 64 | -324 | 1296 | 3302533 | hypothetical protein, conserved            |
| 10 | Tb10.61.3160  | <a href="#">Tb10.61.3160</a>  | <a href="#">Tb10.61.3160</a>  | 2 | 100 | 38 | -141 | 654  | 3288731 | hypothetical protein, conserved            |

|    |               |                               |                               |   |     |     |      |      |         |                                            |
|----|---------------|-------------------------------|-------------------------------|---|-----|-----|------|------|---------|--------------------------------------------|
| 10 | Tb10.70.4940  | <a href="#">Tb10.70.4940</a>  | <a href="#">Tb10.70.4940</a>  | 1 | 100 | 19  | -516 | 1722 | 698117  | hypothetical protein, conserved            |
| 10 | Tb10.70.5020  | <a href="#">Tb10.70.5020</a>  | <a href="#">Tb10.70.5020</a>  | 1 | 100 | 22  | -84  | 2307 | 680402  | intraflagellar transport protein IFT81     |
| 10 | Tb10.70.7450  | <a href="#">Tb10.70.7450</a>  | <a href="#">Tb10.70.7450</a>  | 2 | 100 | 13  | -234 | 1059 | 196401  | hypothetical protein, conserved            |
| 10 | Tb10.70.7880  | <a href="#">Tb10.70.7880</a>  | <a href="#">Tb10.70.7880</a>  | 2 | 100 | 240 | -168 | 1926 | 115804  | hypothetical protein, conserved            |
| 11 | Tb11.01.2270  | <a href="#">Tb11.01.2270</a>  | <a href="#">Tb11.01.2270</a>  | 1 | 100 | 6   | -297 | 1590 | 2741474 | hypothetical protein, conserved            |
| 11 | Tb11.01.2820  | <a href="#">Tb11.01.2820</a>  | <a href="#">Tb11.01.2820</a>  | 1 | 100 | 17  | -15  | 699  | 2893573 | exosome-associated protein 4               |
| 11 | Tb11.01.3410  | <a href="#">Tb11.01.3410</a>  | <a href="#">Tb11.01.3410</a>  | 2 | 100 | 24  | -39  | 1263 | 3042341 | hypothetical protein, conserved            |
| 11 | Tb11.01.7050  | <a href="#">Tb11.01.7050</a>  | <a href="#">Tb11.01.7050</a>  | 2 | 100 | 53  | -15  | 3657 | 4033627 | hypothetical protein, conserved            |
| 11 | Tb11.01.7060  | <a href="#">Tb11.01.7060</a>  | <a href="#">Tb11.01.7060</a>  | 1 | 100 | 12  | -21  | 1029 | 4035771 | hypothetical protein, conserved            |
| 11 | Tb11.01.8510  | <a href="#">Tb11.01.8510</a>  | <a href="#">Tb11.01.8510</a>  | 2 | 100 | 129 | -141 | 1659 | 4400935 | t-complex protein 1, alpha subunit         |
| 11 | Tb11.02.1660  | <a href="#">Tb11.02.1660</a>  | <a href="#">Tb11.02.1660</a>  | 1 | 100 | 23  | -90  | 1524 | 1199825 | hypothetical protein, conserved            |
| 11 | Tb11.02.3350  | <a href="#">Tb11.02.3350</a>  | <a href="#">Tb11.02.3350</a>  | 1 | 100 | 4   | -99  | 2874 | 1568974 | hypothetical protein, conserved            |
| 11 | Tb11.12.0010  | <a href="#">Tb11.12.0010</a>  | <a href="#">Tb11.12.0010</a>  | 1 | 100 | 12  | -279 | 1863 | 2355969 | hypothetical protein, conserved            |
| 11 | Tb11.18.0007  | <a href="#">Tb11.18.0007</a>  | <a href="#">Tb11.18.0007</a>  | 1 | 100 | 9   | -135 | 1338 | 608977  | hypothetical protein, conserved            |
| 11 | Tb11.18.0010  | <a href="#">Tb11.18.0010</a>  | <a href="#">Tb11.18.0010</a>  | 1 | 100 | 31  | -3   | 1269 | 595624  | hypothetical protein, conserved            |
| 11 | Tb11.22.0004  | <a href="#">Tb11.22.0004</a>  | <a href="#">Tb11.22.0004</a>  | 3 | 100 | 173 | -174 | 1728 | 660345  | hypothetical protein, conserved            |
| 11 | Tb11.55.0023  | <a href="#">Tb11.55.0023</a>  | <a href="#">Tb11.55.0023</a>  | 2 | 100 | 26  | -432 | 1419 | 471227  | hypothetical protein, conserved            |
| 6  | Tb927.6.2020  | <a href="#">Tb927.6.2020</a>  | <a href="#">Tb927.6.2020</a>  | 3 | 99  | 9   | -27  | 2238 | 658099  | intergrin alpha chain protein,             |
| 3  | Tb927.3.4170  | <a href="#">Tb927.3.4170</a>  | <a href="#">Tb927.3.4170</a>  | 2 | 98  | 43  | -54  | 414  | 1172073 | hypothetical protein, conserved            |
| 3  | Tb927.3.5620  | <a href="#">Tb927.3.5620</a>  | <a href="#">Tb927.3.5620</a>  | 3 | 98  | 248 | -30  | 3069 | 1568735 | hypothetical protein, conserved            |
| 4  | Tb927.4.2450  | <a href="#">Tb927.4.2450</a>  | <a href="#">Tb927.4.2450</a>  | 3 | 98  | 54  | -6   | 1242 | 636840  | thioredoxin,                               |
| 4  | Tb927.4.2660  | <a href="#">Tb927.4.2660</a>  | <a href="#">Tb927.4.2660</a>  | 2 | 98  | 65  | -39  | 309  | 706596  | hypothetical protein, conserved            |
| 6  | Tb927.6.2230  | <a href="#">Tb927.6.2230</a>  | <a href="#">Tb927.6.2230</a>  | 4 | 98  | 78  | -57  | 2385 | 704537  | hypothetical protein, conserved            |
| 8  | Tb927.8.6630  | <a href="#">Tb927.8.6630</a>  | <a href="#">Tb927.8.6630</a>  | 2 | 98  | 85  | -84  | 639  | 1916177 | hypothetical protein                       |
| 9  | Tb09.160.3090 | <a href="#">Tb09.160.3090</a> | <a href="#">Tb09.160.3090</a> | 5 | 98  | 41  | -6   | 2508 | 783199  | HSP70-like protein                         |
| 9  | Tb09.211.0330 | <a href="#">Tb09.211.0330</a> | <a href="#">Tb09.211.0330</a> | 3 | 98  | 45  | -378 | 1383 | 1322010 | chaperone protein DNAJ,                    |
| 9  | Tb09.v1.0420  | <a href="#">Tb09.v1.0420</a>  | <a href="#">Tb09.v1.0420</a>  | 4 | 98  | 119 | -6   | 603  | 1234736 | hypothetical protein, conserved            |
| 7  | Tb927.7.4770  | <a href="#">Tb927.7.4770</a>  | <a href="#">Tb927.7.4770</a>  | 4 | 97  | 207 | -75  | 597  | 1265132 | cyclophilin-type peptidyl-prolyl isomerase |

|    |               |                               |                               |   |    |     |      |      |         |                                              |
|----|---------------|-------------------------------|-------------------------------|---|----|-----|------|------|---------|----------------------------------------------|
| 7  | Tb927.7.4920  | <a href="#">Tb927.7.4920</a>  | <a href="#">Tb927.7.4920</a>  | 4 | 97 | 86  | -405 | 2226 | 1299282 | hypothetical protein, conserved              |
| 9  | Tb09.211.1010 | <a href="#">Tb09.211.1010</a> | <a href="#">Tb09.211.1010</a> | 6 | 97 | 133 | -21  | 990  | 1449935 | cholinephosphotransferase 2,                 |
| 9  | Tb09.211.2230 | <a href="#">Tb09.211.2230</a> | <a href="#">Tb09.211.2230</a> | 2 | 97 | 35  | -33  | 723  | 1664452 | hypothetical protein, conserved              |
| 10 | Tb10.26.0990  | <a href="#">Tb10.26.0990</a>  | <a href="#">Tb10.26.0990</a>  | 3 | 97 | 81  | -369 | 591  | 2629586 | hypothetical protein, conserved              |
| 10 | Tb10.61.0150  | <a href="#">Tb10.61.0150</a>  | <a href="#">Tb10.61.0150</a>  | 2 | 97 | 69  | -195 | 1539 | 3893675 | inosine-5'-monophosphate dehydrogenase       |
| 3  | Tb927.3.5490  | <a href="#">Tb927.3.5490</a>  | <a href="#">Tb927.3.5490</a>  | 2 | 96 | 24  | -42  | 2070 | 1535250 | flagellar transport protein,                 |
| 5  | Tb927.5.480   | <a href="#">Tb927.5.480</a>   | <a href="#">Tb927.5.480</a>   | 2 | 96 | 23  | -96  | 768  | 150618  | hypothetical protein, conserved              |
| 9  | Tb09.160.1180 | <a href="#">Tb09.160.1180</a> | <a href="#">Tb09.160.1180</a> | 7 | 96 | 70  | -9   | 1740 | 523916  | nucleolar protein                            |
| 7  | Tb927.7.4880  | <a href="#">Tb927.7.4880</a>  | <a href="#">Tb927.7.4880</a>  | 3 | 95 | 81  | -36  | 684  | 1281517 | hypothetical protein, conserved              |
| 9  | Tb09.160.1160 | <a href="#">Tb09.160.1160</a> | <a href="#">Tb09.160.1160</a> | 7 | 95 | 72  | -9   | 2283 | 521183  | nucleolar protein                            |
| 9  | Tb09.211.1020 | <a href="#">Tb09.211.1020</a> | <a href="#">Tb09.211.1020</a> | 6 | 95 | 118 | -153 | 972  | 1452422 | cholinephosphotransferase 2,                 |
| 10 | Tb10.26.0230  | <a href="#">Tb10.26.0230</a>  | <a href="#">Tb10.26.0230</a>  | 4 | 95 | 22  | -324 | 1083 | 2781988 | hypothetical protein, conserved              |
| 11 | Tb11.02.3790  | <a href="#">Tb11.02.3790</a>  | <a href="#">Tb11.02.3790</a>  | 3 | 95 | 20  | -84  | 1155 | 1673109 | hypothetical protein, conserved              |
| 11 | Tb11.02.3810  | <a href="#">Tb11.02.3810</a>  | <a href="#">Tb11.02.3810</a>  | 3 | 95 | 19  | -324 | 1380 | 1677123 | hypothetical protein, conserved              |
| 6  | Tb927.6.3170  | <a href="#">Tb927.6.3170</a>  | <a href="#">Tb927.6.3170</a>  | 2 | 94 | 16  | -72  | 1446 | 944321  | hypothetical protein, conserved              |
| 6  | Tb927.6.5100  | <a href="#">Tb927.6.5100</a>  | <a href="#">Tb927.6.5100</a>  | 7 | 94 | 667 | -21  | 2526 | 1394258 | serine/threonine-protein kinase,             |
| 7  | Tb927.7.980   | <a href="#">Tb927.7.980</a>   | <a href="#">Tb927.7.980</a>   | 3 | 94 | 17  | -255 | 2877 | 252806  | hypothetical protein, conserved              |
| 8  | Tb927.8.5070  | <a href="#">Tb927.8.5070</a>  | <a href="#">Tb927.8.5070</a>  | 4 | 94 | 189 | -15  | 393  | 1497534 | hypothetical protein, conserved              |
| 9  | Tb09.160.1140 | <a href="#">Tb09.160.1140</a> | <a href="#">Tb09.160.1140</a> | 3 | 94 | 18  | -189 | 1161 | 517076  | electron transport protein,                  |
| 2  | Tb927.2.6050  | <a href="#">Tb927.2.6050</a>  | <a href="#">Tb927.2.6050</a>  | 3 | 92 | 26  | -12  | 2568 | 1092934 | beta prime COP protein                       |
| 3  | Tb927.3.5070  | <a href="#">Tb927.3.5070</a>  | <a href="#">Tb927.3.5070</a>  | 3 | 92 | 14  | -111 | 1938 | 1421239 | hypothetical protein, conserved              |
| 10 | Tb10.389.1390 | <a href="#">Tb10.389.1390</a> | <a href="#">Tb10.389.1390</a> | 5 | 92 | 27  | -426 | 798  | 2925678 | hypothetical protein, conserved              |
| 4  | Tb927.4.1590  | <a href="#">Tb927.4.1590</a>  | <a href="#">Tb927.4.1590</a>  | 2 | 88 | 42  | -237 | 1293 | 410232  | hypothetical protein, conserved              |
| 4  | Tb927.4.680   | <a href="#">Tb927.4.680</a>   | <a href="#">Tb927.4.680</a>   | 3 | 88 | 25  | -261 | 1140 | 194973  | hypothetical protein, conserved              |
| 10 | Tb10.26.0920  | <a href="#">Tb10.26.0920</a>  | <a href="#">Tb10.26.0920</a>  | 2 | 88 | 8   | -93  | 750  | 2648015 | hypothetical protein, conserved              |
| 10 | Tb10.26.0900  | <a href="#">Tb10.26.0900</a>  | <a href="#">Tb10.26.0900</a>  | 7 | 87 | 52  | -45  | 4671 | 2656714 | hypothetical protein, conserved              |
| 7  | Tb927.7.1550  | <a href="#">Tb927.7.1550</a>  | <a href="#">Tb927.7.1550</a>  | 2 | 86 | 7   | -165 | 1464 | 386392  | RNA-editing 3' terminal uridylyl transferase |
| 11 | Tb11.03.0990  | <a href="#">Tb11.03.0990</a>  | <a href="#">Tb11.03.0990</a>  | 2 | 85 | 117 | -192 | 3708 | 28840   | expression site-associated gene 4,           |

|    |               |                               |                               |   |    |    |      |      |         |                                                            |
|----|---------------|-------------------------------|-------------------------------|---|----|----|------|------|---------|------------------------------------------------------------|
| 4  | Tb927.4.2550  | <a href="#">Tb927.4.2550</a>  | <a href="#">Tb927.4.2550</a>  | 5 | 84 | 12 | -90  | 909  | 671279  | hypothetical protein, conserved                            |
| 10 | Tb10.70.1440  | <a href="#">Tb10.70.1440</a>  | <a href="#">Tb10.70.1440</a>  | 2 | 75 | 4  | -93  | 1770 | 1391982 | GPI anchor biosynthesis protein                            |
| 7  | Tb927.7.7290  | <a href="#">Tb927.7.7290</a>  | <a href="#">Tb927.7.7290</a>  | 2 | 67 | 3  | -342 | 3048 | 2106650 | hypothetical protein, conserved                            |
| 10 | Tb10.26.0980  | <a href="#">Tb10.26.0980</a>  | <a href="#">Tb10.26.0980</a>  | 2 | 67 | 3  | -198 | 1452 | 2631353 | hypothetical protein, conserved                            |
| 11 | Tb11.01.4690  | <a href="#">Tb11.01.4690</a>  | <a href="#">Tb11.01.4690</a>  | 6 | 67 | 21 | -330 | 2124 | 3443911 | hypothetical protein, conserved                            |
| 11 | Tb11.02.2740  | <a href="#">Tb11.02.2740</a>  | <a href="#">Tb11.02.2740</a>  | 2 | 67 | 3  | -87  | 1254 | 1429902 | aspartate aminotransferase, mitochondrial                  |
| 10 | Tb10.389.0710 | <a href="#">Tb10.389.0710</a> | <a href="#">Tb10.389.0710</a> | 4 | 64 | 22 | -90  | 1011 | 3047285 | acetyltransferase,                                         |
| 10 | Tb10.26.0240  | <a href="#">Tb10.26.0240</a>  | <a href="#">Tb10.26.0240</a>  | 3 | 60 | 5  | -159 | 1362 | 2780365 | hypothetical protein, conserved                            |
| 8  | Tb927.8.5900  | <a href="#">Tb927.8.5900</a>  | <a href="#">Tb927.8.5900</a>  | 4 | 57 | 7  | -6   | 396  | 1735242 | hypothetical protein, conserved                            |
| 5  | Tb927.5.2890  | <a href="#">Tb927.5.2890</a>  | <a href="#">Tb927.5.2890</a>  | 3 | 56 | 18 | -102 | 6594 | 913081  | hypothetical protein, conserved                            |
| 6  | Tb927.6.1460  | <a href="#">Tb927.6.1460</a>  | <a href="#">Tb927.6.1460</a>  | 5 | 56 | 39 | -111 | 1356 | 515869  | cyclin 3,mitotic cyclin,                                   |
| 6  | Tb927.6.1490  | <a href="#">Tb927.6.1490</a>  | <a href="#">Tb927.6.1490</a>  | 2 | 56 | 16 | -126 | 1311 | 524460  | leucine-rich repeat protein (LRRP)                         |
| 4  | Tb927.4.4910  | <a href="#">Tb927.4.4910</a>  | <a href="#">Tb927.4.4910</a>  | 2 | 51 | 39 | -210 | 1413 | 1345523 | 3,2-trans-enoyl-CoA isomerase,<br>mitochondrial precursor, |
| 6  | Tb927.6.2960  | <a href="#">Tb927.6.2960</a>  | <a href="#">Tb927.6.2960</a>  | 2 | 50 | 6  | -129 | 3207 | 882763  | epsilon-adaptin,                                           |
| 8  | Tb927.8.1600  | <a href="#">Tb927.8.1600</a>  | <a href="#">Tb927.8.1600</a>  | 2 | 47 | 36 | -228 | 1983 | 531183  | lysyl-tRNA synthetase,                                     |
| 9  | Tb09.244.2830 | <a href="#">Tb09.244.2830</a> | <a href="#">Tb09.244.2830</a> | 5 | 29 | 24 | -42  | 1083 | 2292101 | hypothetical protein, conserved                            |
| 7  | Tb927.7.7490  | <a href="#">Tb927.7.7490</a>  | <a href="#">Tb927.7.7490</a>  | 2 | 25 | 8  | -204 | 1041 | 2165127 | hypothetical protein, conserved                            |

## CATEGORY 3

After obtaining ORF extension data for genes where I had upstream SAS predictions, I ran a predictive algorithm on 1,768 protein-coding genes for which I had no SAS data. 47 genes were predicted to have upstream ORF extensions, compared to the TrypDB ATG predictions. Nine of the 47 were predicted to be very unlikely extensions because polyY tracts that probably represent splice signals were apparent by visual inspection of the predicted extension sequences. (Prior to obtaining additional SAS data there were 74 genes predicted to have upstream extensions: the additional data, from 76-bp reads, showed SAS that are consistent with the use of the upstream ATG.) It is not known why the first in-frame ATG was not used to predict these ORFs in TrypDB. Some of these predicted extensions might be incorrect, if the upstream SAS represents an intermediate or aberrant splice site and the tag abundance was too low to find a further downstream SAS.

| Chr | GeneID       | <a href="#">TryDB</a>        | <a href="#">TriTryDB</a>     | Relative ATG Position | Predicted ORF Start | Predicted ORF Length | Original ORF Length | Abbreviated Description from TrypDB  |
|-----|--------------|------------------------------|------------------------------|-----------------------|---------------------|----------------------|---------------------|--------------------------------------|
| 1   | Tb927.1.3730 | <a href="#">Tb927.1.3730</a> | <a href="#">Tb927.1.3730</a> | -93                   | 793438              | 267                  | 174                 | hypothetical protein                 |
| 3   | Tb927.3.2500 | <a href="#">Tb927.3.2500</a> | <a href="#">Tb927.3.2500</a> | -102                  | 632487              | 1290                 | 1188                | hypothetical protein                 |
| 3   | Tb927.3.3230 | <a href="#">Tb927.3.3230</a> | <a href="#">Tb927.3.3230</a> | -138                  | 835188              | 1968                 | 1830                | hypothetical protein, conserved      |
| 4   | Tb927.4.1410 | <a href="#">Tb927.4.1410</a> | <a href="#">Tb927.4.1410</a> | -297                  | 367410              | 1845                 | 1548                | hypothetical protein, conserved      |
| 4   | Tb927.4.2400 | <a href="#">Tb927.4.2400</a> | <a href="#">Tb927.4.2400</a> | -117                  | 619197              | 4404                 | 4287                | hypothetical protein, conserved      |
| 4   | Tb927.4.2490 | <a href="#">Tb927.4.2490</a> | <a href="#">Tb927.4.2490</a> | -105                  | 652953              | 1353                 | 1248                | hypothetical protein, conserved      |
| 4   | Tb927.4.2580 | <a href="#">Tb927.4.2580</a> | <a href="#">Tb927.4.2580</a> | -27                   | 677636              | 3048                 | 3021                | hypothetical protein, conserved      |
| 4   | Tb927.4.2720 | <a href="#">Tb927.4.2720</a> | <a href="#">Tb927.4.2720</a> | -90                   | 716452              | 2310                 | 2220                | hypothetical protein, conserved      |
| 4   | Tb927.4.4130 | <a href="#">Tb927.4.4130</a> | <a href="#">Tb927.4.4130</a> | -213                  | 1094078             | 2784                 | 2571                | hypothetical protein, conserved      |
| 4   | Tb927.4.4670 | <a href="#">Tb927.4.4670</a> | <a href="#">Tb927.4.4670</a> | -87                   | 1291160             | 1539                 | 1452                | hypothetical protein, conserved      |
| 5   | Tb927.5.2800 | <a href="#">Tb927.5.2800</a> | <a href="#">Tb927.5.2800</a> | -111                  | 888774              | 3255                 | 3144                | hypothetical protein, conserved      |
| 5   | Tb927.5.3760 | <a href="#">Tb927.5.3760</a> | <a href="#">Tb927.5.3760</a> | -189                  | 1170071             | 1485                 | 1296                | meiotic recombination protein SPO11, |
| 7   | Tb927.7.310  | <a href="#">Tb927.7.310</a>  | <a href="#">Tb927.7.310</a>  | -141                  | 58581               | 1029                 | 888                 | hypothetical protein, conserved      |
| 7   | Tb927.7.4150 | <a href="#">Tb927.7.4150</a> | <a href="#">Tb927.7.4150</a> | -255                  | 1104777             | 3756                 | 3501                | hypothetical protein, conserved      |
| 7   | Tb927.7.7010 | <a href="#">Tb927.7.7010</a> | <a href="#">Tb927.7.7010</a> | -105                  | 2007048             | 570                  | 465                 | hypothetical protein, conserved      |
| 7   | Tb927.7.7550 | <a href="#">Tb927.7.7550</a> | <a href="#">Tb927.7.7550</a> | -111                  | 2203046             | 426                  | 315                 | hypothetical protein                 |

|    |                |                                |                                |      |         |      |      |                                                   |
|----|----------------|--------------------------------|--------------------------------|------|---------|------|------|---------------------------------------------------|
| 8  | Tb927.8.4560   | <a href="#">Tb927.8.4560</a>   | <a href="#">Tb927.8.4560</a>   | -21  | 1354850 | 3777 | 3756 | hypothetical protein, conserved                   |
| 8  | Tb927.8.5560   | <a href="#">Tb927.8.5560</a>   | <a href="#">Tb927.8.5560</a>   | -192 | 1638560 | 1794 | 1602 | hypothetical protein, conserved                   |
| 9  | Tb09.142.0310  | <a href="#">Tb09.142.0310</a>  | <a href="#">Tb09.142.0310</a>  | -45  | 158876  | 1029 | 984  | expression site-associated gene 1 (ESAG1) protein |
| 9  | Tb09.160.0940  | <a href="#">Tb09.160.0940</a>  | <a href="#">Tb09.160.0940</a>  | -120 | 481147  | 396  | 276  | hypothetical protein                              |
| 9  | Tb09.160.3980  | <a href="#">Tb09.160.3980</a>  | <a href="#">Tb09.160.3980</a>  | -360 | 894498  | 2997 | 2637 | hypothetical protein, conserved                   |
| 9  | Tb09.244.0340  | <a href="#">Tb09.244.0340</a>  | <a href="#">Tb09.244.0340</a>  | -42  | 2955321 | 276  | 234  | hypothetical protein                              |
| 9  | Tb09.244.2070  | <a href="#">Tb09.244.2070</a>  | <a href="#">Tb09.244.2070</a>  | -189 | 2472102 | 1020 | 831  | GTP-binding protein,                              |
| 9  | Tb09.v1.0030   | <a href="#">Tb09.v1.0030</a>   | <a href="#">Tb09.v1.0030</a>   | -54  | 274471  | 390  | 336  | hypothetical protein, conserved                   |
| 9  | Tb09.v1.0370   | <a href="#">Tb09.v1.0370</a>   | <a href="#">Tb09.v1.0370</a>   | -273 | 1224471 | 2772 | 2499 | hypothetical protein, conserved                   |
| 9  | Tb09.v1.0450   | <a href="#">Tb09.v1.0450</a>   | <a href="#">Tb09.v1.0450</a>   | -51  | 1245366 | 969  | 918  | hypothetical protein, conserved                   |
| 9  | Tb09.v1.0470   | <a href="#">Tb09.v1.0470</a>   | <a href="#">Tb09.v1.0470</a>   | -180 | 1251263 | 1110 | 930  | hypothetical protein, conserved                   |
| 10 | Tb10.26.0260   | <a href="#">Tb10.26.0260</a>   | <a href="#">Tb10.26.0260</a>   | -189 | 2775542 | 1476 | 1287 | hypothetical protein, conserved                   |
| 10 | Tb10.26.0780   | <a href="#">Tb10.26.0780</a>   | <a href="#">Tb10.26.0780</a>   | -33  | 2677861 | 1005 | 972  | hypothetical protein, conserved                   |
| 10 | Tb10.389.0470  | <a href="#">Tb10.389.0470</a>  | <a href="#">Tb10.389.0470</a>  | -204 | 3095858 | 2241 | 2037 | calpain-like cysteine peptidase,                  |
| 10 | Tb10.389.0600  | <a href="#">Tb10.389.0600</a>  | <a href="#">Tb10.389.0600</a>  | -192 | 3070836 | 3108 | 2916 | hypothetical protein, conserved                   |
| 10 | Tb10.61.1190   | <a href="#">Tb10.61.1190</a>   | <a href="#">Tb10.61.1190</a>   | -99  | 3659800 | 5037 | 4938 | hypothetical protein, conserved                   |
| 10 | Tb10.61.2747   | <a href="#">Tb10.61.2747</a>   | <a href="#">Tb10.61.2747</a>   | -3   | 3358370 | 1584 | 1581 | transporter,                                      |
| 10 | Tb10.6k15.3320 | <a href="#">Tb10.6k15.3320</a> | <a href="#">Tb10.6k15.3320</a> | -54  | 1839419 | 1995 | 1941 | ATP-binding cassette protein,                     |
| 10 | Tb10.70.1380   | <a href="#">Tb10.70.1380</a>   | <a href="#">Tb10.70.1380</a>   | -39  | 1402441 | 612  | 573  | 40S ribosomal protein S9,                         |
| 11 | Tb11.02.2240   | <a href="#">Tb11.02.2240</a>   | <a href="#">Tb11.02.2240</a>   | -183 | 1311482 | 3339 | 3156 | calpain-like protein,                             |
| 11 | Tb11.02.2950   | <a href="#">Tb11.02.2950</a>   | <a href="#">Tb11.02.2950</a>   | -99  | 1483471 | 456  | 357  | ATPase subunit 9,                                 |
| 11 | Tb11.02.3720   | <a href="#">Tb11.02.3720</a>   | <a href="#">Tb11.02.3720</a>   | -351 | 1655173 | 2532 | 2181 | hypothetical protein, conserved                   |

The following predicted extensions are unlikely: they contain a probable SAS.

|   |              |                              |                              |      |        |      |     |                                    |
|---|--------------|------------------------------|------------------------------|------|--------|------|-----|------------------------------------|
| 3 | Tb927.3.2520 | <a href="#">Tb927.3.2520</a> | <a href="#">Tb927.3.2520</a> | -114 | 636507 | 1089 | 975 | expression site-associated gene 1, |
|---|--------------|------------------------------|------------------------------|------|--------|------|-----|------------------------------------|

|   |               |                               |                               |      |         |      |      |                                         |
|---|---------------|-------------------------------|-------------------------------|------|---------|------|------|-----------------------------------------|
| 5 | Tb927.5.1670  | <a href="#">Tb927.5.1670</a>  | <a href="#">Tb927.5.1670</a>  | -363 | 526728  | 1410 | 1047 | hypothetical protein, conserved         |
| 6 | Tb927.6.1450  | <a href="#">Tb927.6.1450</a>  | <a href="#">Tb927.6.1450</a>  | -126 | 514081  | 969  | 843  | hypothetical protein, conserved         |
| 6 | Tb927.6.2920  | <a href="#">Tb927.6.2920</a>  | <a href="#">Tb927.6.2920</a>  | -294 | 874885  | 2253 | 1959 | hypothetical protein, conserved         |
| 6 | Tb927.6.2960  | <a href="#">Tb927.6.2960</a>  | <a href="#">Tb927.6.2960</a>  | -129 | 882763  | 3207 | 3078 | epsilon-adaptin,                        |
| 8 | Tb927.8.6670  | <a href="#">Tb927.8.6670</a>  | <a href="#">Tb927.8.6670</a>  | -252 | 1933066 | 1785 | 1533 | hypothetical protein, conserved         |
| 9 | Tb09.160.0370 | <a href="#">Tb09.160.0370</a> | <a href="#">Tb09.160.0370</a> | -144 | 335139  | 1284 | 1140 | hypothetical protein, conserved         |
| 9 | Tb09.160.5070 | <a href="#">Tb09.160.5070</a> | <a href="#">Tb09.160.5070</a> | -330 | 1081428 | 1152 | 822  | DNA topoisomerase type IB small subunit |
| 8 | Tb927.8.2810  | <a href="#">Tb927.8.2810</a>  | <a href="#">Tb927.8.2810</a>  | -381 | 839490  | 2988 | 2607 | 5'-3' exonuclease XRNC,                 |
